# Supplementary material for: Modified Gompertz sigmoidal model removing fine-ending of grain-size distribution
Source: publisher site journal article supplement (doi:10.1515/geo-2019-0003), 2019-02-26
Supplement: Supplementary file 1 [file geo-2019-0003_sm2.xlsx]

## Sheet: Supporting Information 2
Supporting Information 2
Article title:	Modified Gompertz sigmoidal model removing fine-ending of grain-size distribution
Journal name:	Open Geosciences
Author names:	Rui Yuan, Bo Yang, Yingfei Liu, Lingyu Huang
Corresponding author:	Bo Yang. State Key Laboratory of Oil and Gas Reservoir Geology and Exploitation, Chengdu University of Technology, Chengdu, Sichuan, 610059, China.yangbo15@cdut.edu.cn

## Sheet: parameters of GSD-GM
All parameters of 113 GSDGMs y =100*exp(-a*exp(-k*(x-xc)))
Depth	a	xc	k
1140.93	1.36665	1.80496	0.55507
1142.24	0.75901	2.04004	0.45908
1143.83	1.12749	2.26123	0.44061
1145.41	1.06948	2.16499	0.46928
1155.52	1.42939	1.84017	0.54415
1160.2	0.52305	3.1169	0.5631
1172.02	2.1632	1.93598	0.62207
1174.75	1.08937	1.35306	0.47158
1177.42	0.56178	4.76091	0.8482
1181.9	1.51067	1.65319	0.60749
1186.4	1.97596	1.57469	0.64051
1189.2	1.22956	1.81835	0.55069
1191.95	5.18343	1.53925	0.71114
1194.94	1.53835	1.76604	0.56787
1199.34	1.50383	1.93167	0.51889
1200.62	0.51734	3.49795	0.62726
1204.26	0.49323	3.49397	0.50925
1205.53	1.6336	2.1748	0.56887
1210.12	0.70759	2.95185	0.51223
1214.66	1.43931	1.78784	0.56396
1292.77	1.19005	2.55323	0.39109
1299.64	0.59934	4.5987	0.463
1301	0.45454	5.06412	0.71735
1302.34	0.54807	5.21458	0.81761
1303.37	1.77103	1.72588	0.58293
1315.05	1.04739	1.82622	0.57307
1317.92	2.48439	1.62739	0.63569
1319.17	0.99857	2.10237	0.47418
1321.24	1.36683	2.2247	0.45291
1329.31	1.51341	1.57731	0.64093
1332.64	1.39665	1.6466	0.6105
1333.17	1.12292	0.85697	0.52963
1338.07	0.7423	2.01547	0.42336
1349.45	0.74141	1.84777	0.54021
1353.21	1.37491	1.44261	0.6956
1354.39	1.04189	1.41654	0.71556
1355.05	0.6618	2.67229	0.63408
1358.92	1.02691	1.07492	0.67864
1364.75	1.37482	1.46996	0.68813
1378.37	1.25835	1.81462	0.69572
1380.1	1.01894	0.64862	0.64465
1380.8	4.48087	0.96407	1.04656
1381.7	2.19768	1.26332	0.79774
1382.31	0.82463	2.63708	0.84021
1383.5	0.34261	3.91187	0.9477
1386.72	2.41134	1.68235	0.6621
1431.23	0.49978	5.09126	0.71258
1436.46	1.62215	1.23055	0.81964
1451.78	1.10729	1.78878	0.96534
1452.92	0.98854	1.21983	0.86559
1453.53	0.919	1.53249	0.87037
1454.45	1.33789	1.2981	0.77871
1455.12	0.84092	2.21241	0.91683
1457.82	1.01213	1.27558	0.79033
1458.76	1.2991	1.1208	0.91357
1460.52	0.48844	4.42481	0.78302
1470.04	0.9881	1.27476	0.91231
1470.53	1.25487	1.64754	0.75281
1471.35	1.21518	0.90633	0.58218
1473.53	1.88347	1.0861	1.03917
1474.03	1.30012	0.72498	0.76051
1474.6	0.89064	1.45045	0.72609
1475.74	0.94159	1.71527	0.7914
1476.37	1.21357	1.04291	0.77998
1476.88	1.12992	1.34711	0.74475
1481.91	2.76311	2.09057	0.58088
1484.34	1.15298	1.48371	0.67848
1484.87	2.30024	1.21088	0.82948
1486.28	1.62133	1.03507	0.98736
1489.91	3.14006	1.51632	0.69271
1496.47	1.00412	0.84246	0.86681
1499.68	0.83451	0.9828	0.80137
1504.4	1.13005	1.27885	0.80384
1508.39	0.90583	2.50341	1.36297
1513.74	0.69956	4.00972	0.58024
1536.27	0.40297	5.72132	0.58864
1581.26	4.25389	0.93397	1.09816
1584.34	3.07347	1.78402	0.91672
1591.04	0.99777	1.78129	1.06469
1597.72	1.84887	2.00569	0.85226
1598.72	1.50798	0.83249	1.27112
1600.55	2.19254	0.82294	1.22767
1607.14	2.22204	1.20524	0.83341
1607.83	2.38386	1.09817	0.93483
1618.76	7.83819	1.0297	0.99259
1621.86	1.30108	1.21776	0.82618
1622.29	2.10121	1.12378	0.90735
1625.65	0.93523	1.38026	0.6801
1627.05	0.97469	1.6993	0.99595
1628.85	1.70844	1.95582	0.71942
1638.46	1.02025	1.32203	0.7589
1643.06	0.6955	3.15311	0.90233
1646.6	2.1042	1.5599	0.66869
1649	3.10831	1.47906	0.71628
1650.18	2.24143	1.1765	0.91927
1652.81	2.1898	0.99124	1.01642
1659.07	2.00583	1.68637	0.85474
1659.75	3.06297	1.40613	1.06731
1660.05	1.45822	1.55014	0.64609
1666.32	0.7582	2.66957	0.68646
1670.41	4.35974	1.41411	0.71902
1670.98	2.37705	1.09546	0.93679
1671.61	2.2225	1.21021	0.83432
1674.08	0.89715	1.81835	0.8251
1674.93	1.72647	1.04741	0.98841
1675.51	1.00364	1.09292	0.9637
1687.84	1.41323	1.25475	0.83577
1688.48	0.75535	2.93515	0.76074
1689.28	1.00658	1.33704	0.96612
1692.78	1.41558	1.15489	0.89065
1693.48	2.46481	1.21237	0.83811
1693.93	1.95758	1.69249	0.79229
1724.28	6.07008	1.16588	0.93321

## Sheet: frequency
frequency of fitted GSD
ϕ	-3	-2.75	-2.5	-2.25	-2	-1.75	-1.5	-1.25	-1	-0.75	-0.5	-0.25	0	0.25	0.5	0.75	1	1.25	1.5	1.75	2	2.25	2.5	2.75	3	3.25	3.5	3.75	4	5	6	7	8	9	10	11	12	13	14	15	CODf
1140.93	0	3.35974e-06	2.98843e-05	0.000197852	0.00101	0.00413	0.01383	0.039	0.09459	0.20117	0.38146	0.65444	1.02886	1.49892	2.04345	2.62917	3.21639	3.76559	4.24293	4.62395	4.89487	5.05217	5.10085	5.0521	4.92087	4.7238	4.47753	4.19752	3.89741	12.54	8.23593	5.10864	3.06613	1.80569	1.05187	0.60893	0.35124	0.20219	0.11625	0.06679	0.927009
1142.24	0	0.06025	0.11734	0.21006	0.34884	0.54172	0.79233	1.09857	1.45224	1.83976	2.24384	2.6455	3.02618	3.36955	3.66272	3.89689	4.06745	4.17364	4.21791	4.20517	4.14204	4.03604	3.89508	3.72692	3.53882	3.33736	3.12828	2.91642	2.70578	8.83782	6.12482	4.10302	2.69018	1.74002	1.11582	0.71166	0.45233	0.28688	0.1817	0.11498	0.875499
1143.83	0	0.00245	0.00672	0.01644	0.03626	0.07282	0.13453	0.23054	0.36937	0.55712	0.79604	1.08353	1.41209	1.76989	2.14216	2.51278	2.86594	3.18753	3.46619	3.69384	3.86583	3.98077	4.03999	4.04708	4.00717	3.92643	3.81147	3.66899	3.50541	12.1579	9.11571	6.47419	4.43998	2.97697	1.9672	1.28781	0.83798	0.54316	0.35119	0.2267	0.918519
1145.41	0	0.0016	0.00496	0.01339	0.03202	0.06867	0.1337	0.23884	0.39511	0.61047	0.88752	1.22225	1.60398	2.01647	2.44002	2.85383	3.23833	3.57703	3.85764	4.07254	4.21865	4.29692	4.31146	4.2687	4.17648	4.04332	3.87781	3.68813	3.48176	11.7397	8.41969	5.73779	3.78677	2.44944	1.56458	0.99154	0.62529	0.39311	0.24666	0.15459	0.941419
1155.52	0	2.62108e-06	2.31051e-05	0.000152627	0.000782903	0.00322	0.01089	0.03108	0.07644	0.16499	0.31773	0.5537	0.88421	1.30817	1.81041	2.36343	2.93197	3.47873	3.96986	4.37883	4.68858	4.89168	4.98924	4.98906	4.90345	4.74715	4.53572	4.28416	4.00613	13.0864	8.78297	5.54708	3.38143	2.01923	1.19143	0.69812	0.40741	0.2372	0.13792	0.08013	0.904636
1160.2	0	5.82008e-05	0.000361047	0.00174	0.00671	0.02133	0.05735	0.13315	0.27203	0.4972	0.82481	1.25753	1.7815	2.36756	2.97627	3.5649	4.09413	4.53314	4.86221	5.07305	5.16743	5.15485	5.04985	4.86962	4.63193	4.35371	4.05009	3.73394	3.41569	10.6792	6.76764	4.0963	2.4152	1.40285	0.80792	0.46303	0.26464	0.15101	0.08609	0.04906	0.946849
1172.02	0	4.6485e-16	1.45468e-13	1.98495e-11	1.32881e-09	4.8258e-08	1.03593e-06	1.41456e-05	0.000130855	0.000865652	0.00429	0.01659	0.05179	0.13455	0.29848	0.57806	0.99639	1.55394	2.22416	2.95748	3.69199	4.36611	4.92929	5.34823	5.60848	5.71228	5.6744	5.5174	5.26729	17.5666	11.6448	7.00477	3.99793	2.21807	1.21199	0.65684	0.35442	0.19079	0.10257	0.05511	0.99587
1174.75	0	0.03239	0.06964	0.13585	0.24295	0.40218	0.62151	0.90341	1.24355	1.63078	2.04835	2.47604	2.89267	3.27844	3.61675	3.89541	4.10699	4.24872	4.32185	4.33083	4.28237	4.18457	4.04616	3.87587	3.68196	3.47198	3.2525	3.02914	2.80649	9.12496	6.26223	4.147	2.68565	1.71518	1.08589	0.68376	0.42909	0.2687	0.16804	0.105	0.861151
1177.42	0	2.48486e-141	4.40151e-114	4.84632e-92	3.27768e-74	8.68583e-60	4.03761e-48	1.10687e-38	4.772e-31	7.15346e-25	7.08403e-20	7.7883e-16	1.44634e-12	6.36665e-10	8.72661e-08	4.63697e-06	0.000113889	0.00149	0.01165	0.05974	0.21716	0.5959	1.29996	2.35241	3.65637	5.02226	6.23944	7.14507	7.65892	28.9524	18.9561	9.76566	4.52871	2.00671	0.87196	0.37572	0.16131	0.06915	0.02962	0.01269	0.96955
1181.9	0	2.93577e-08	6.32375e-07	8.74839e-06	8.25628e-05	0.00055995	0.00285	0.01137	0.03663	0.09818	0.22461	0.44825	0.79524	1.27482	1.87277	2.55201	3.25981	3.93854	4.53614	5.01369	5.34875	5.53511	5.57999	5.5001	5.31751	5.05625	4.73963	4.38864	4.02099	12.5025	7.7316	4.51379	2.55349	1.4199	0.78218	0.42868	0.23429	0.12785	0.06971	0.03799	0.896896
1186.4	0	2.01003e-12	2.12467e-10	1.12128e-08	3.26651e-07	5.72125e-06	6.47959e-05	0.000504983	0.00286	0.01228	0.0417	0.11579	0.27056	0.54545	0.96926	1.54625	2.24959	3.02521	3.80394	4.51662	5.1068	5.5381	5.79583	5.88422	5.82132	5.63341	5.34998	4.99999	4.60945	14.3909	8.80959	5.02563	2.76177	1.488	0.79339	0.42071	0.22244	0.11743	0.06194	0.03266	0.956055
1189.2	0	2.20214e-05	0.00014971	0.00078515	0.00328	0.01124	0.03237	0.08006	0.17339	0.33437	0.58267	0.92934	1.37201	1.89343	2.46362	3.04505	3.59881	4.09027	4.49309	4.79105	4.97809	5.05689	5.03674	4.93127	4.75628	4.52804	4.26201	3.97204	3.66996	11.7118	7.63441	4.72524	2.83825	1.67553	0.97929	0.56907	0.32959	0.19052	0.11001	0.06348	0.904218
1191.95	0	2.84629e-46	1.57911e-38	4.79954e-32	1.28258e-26	4.47757e-22	2.84451e-18	4.33895e-15	2.00349e-12	3.3974e-10	2.48529e-08	8.96783e-07	1.7849e-05	0.000215159	0.0017	0.00939	0.03842	0.12195	0.31264	0.66961	1.23283	1.99883	2.91254	3.88	4.79421	5.56152	6.11909	6.44037	6.53108	23.6268	16.2224	9.40738	5.0148	2.56418	1.28448	0.63697	0.31431	0.15472	0.07607	0.03738	0.993137
1194.94	0	1.98313e-07	2.72573e-06	2.6199e-05	0.000184356	0.000988461	0.00418	0.01439	0.04136	0.10165	0.21798	0.41514	0.71308	1.11969	1.62619	2.20693	2.82367	3.43243	3.99095	4.46452	4.82955	5.07445	5.19864	5.21023	5.12329	4.95514	4.72421	4.44826	4.14337	13.3758	8.77071	5.40025	3.20796	1.86724	1.07436	0.61412	0.34974	0.19876	0.11282	0.06399	0.903707
1199.34	0	3.49928e-06	2.69515e-05	0.000160132	0.000756818	0.00292	0.00945	0.02613	0.06293	0.13419	0.25711	0.44835	0.71963	1.07382	1.50276	1.98768	2.50182	3.01455	3.49569	3.91927	4.26589	4.52383	4.68882	4.76308	4.75378	4.6714	4.52826	4.33721	4.11071	13.837	9.71146	6.37772	4.02523	2.48095	1.50767	0.90853	0.54474	0.32565	0.19433	0.11584	0.924727
1200.62	0	4.79955e-10	2.08186e-08	5.18421e-07	8.01385e-06	8.22201e-05	0.000592962	0.00316	0.01296	0.04252	0.11508	0.26404	0.52574	0.927	1.47273	2.13979	2.87996	3.63024	4.32627	4.91393	5.3566	5.63727	5.75673	5.72926	5.57769	5.32879	5.00961	4.64509	4.25664	13.1865	8.05227	4.62048	2.56421	1.39784	0.75475	0.40545	0.21721	0.1162	0.06211	0.03319	0.966229
1204.26	0	0.000566876	0.00222	0.00726	0.02038	0.04985	0.10807	0.21053	0.37326	0.60897	0.92331	1.31226	1.76175	2.24933	2.74748	3.22755	3.66337	4.03399	4.32515	4.52958	4.64646	4.68022	4.63909	4.53373	4.37589	4.17745	3.94965	3.70264	3.44515	11.222	7.61233	4.92079	3.08982	1.90648	1.16402	0.70622	0.42684	0.25739	0.155	0.09326	0.938054
1205.53	0	2.03054e-10	7.10261e-09	1.53972e-07	2.20013e-06	2.18623e-05	0.000158281	0.00086956	0.00376	0.01316	0.03839	0.09558	0.20722	0.39832	0.68961	1.0901	1.59218	2.17109	2.78896	3.40167	3.96633	4.44741	4.82043	5.07305	5.2041	5.22135	5.1387	4.97353	4.74434	15.9948	11.0023	6.95814	4.19479	2.46102	1.42173	0.81418	0.46395	0.26364	0.14957	0.08478	0.918488
1210.12	0	0.000165744	0.000764502	0.0029	0.00924	0.02526	0.06038	0.12811	0.24475	0.42625	0.68421	1.02212	1.43323	1.90066	2.3997	2.90146	3.377	3.80081	4.15331	4.42203	4.60161	4.69297	4.70204	4.63818	4.51278	4.33802	4.12592	3.88762	3.63304	11.9247	8.15165	5.2865	3.32152	2.04761	1.24797	0.75542	0.4554	0.27386	0.16445	0.09866	0.899292
1214.66	0	7.83484e-07	8.78811e-06	7.09086e-05	0.000429196	0.00202	0.00765	0.02392	0.06334	0.14507	0.29284	0.52959	0.8703	1.31588	1.85044	2.44315	3.05355	3.63873	4.15994	4.58745	4.90287	5.09923	5.17944	5.15386	5.0376	4.84812	4.60328	4.3199	4.01291	12.9006	8.43338	5.19386	3.09154	1.80475	1.04196	0.59778	0.34173	0.19495	0.11109	0.06326	0.937015
1292.77	0	0.0048	0.01093	0.02285	0.04421	0.07976	0.13499	0.21562	0.3268	0.47225	0.65355	0.86965	1.11672	1.38838	1.67624	1.97067	2.26157	2.53921	2.79487	3.02134	3.21321	3.36699	3.481	3.55524	3.59112	3.59114	3.55863	3.49742	3.41163	12.4397	10.0953	7.72521	5.68049	4.06561	2.85704	1.98302	1.36488	0.93411	0.63685	0.43306	0.936818
1299.64	0	1.35213e-06	9.34791e-06	5.18336e-05	0.000236004	0.000901098	0.00294	0.00834	0.02085	0.04663	0.09437	0.17472	0.29877	0.47592	0.71166	1.00584	1.35193	1.73747	2.14551	2.55669	2.9515	3.31226	3.62459	3.87827	4.06748	4.19053	4.24924	4.2482	4.19393	15.443	12.3143	8.99961	6.22408	4.15711	2.7162	1.75031	1.1181	0.71033	0.44971	0.28409	0.986216
1301	0	2.11092e-52	1.36999e-43	3.17836e-36	4.5546e-30	6.36774e-25	1.27271e-20	5.00403e-17	5.05265e-14	1.63628e-11	2.04497e-09	1.15029e-07	3.30945e-06	5.41778e-05	0.000551709	0.00377	0.01836	0.06739	0.19483	0.46088	0.92104	1.59768	2.46101	3.43147	4.40141	5.26419	5.93794	6.37743	6.57407	24.4183	17.1423	10.0102	5.33494	2.71828	1.35486	0.66806	0.32768	0.16032	0.07834	0.03825	0.971321
1302.34	0	6.05306e-159	2.51655e-129	3.50049e-105	1.67563e-85	1.84526e-69	2.1996e-56	1.00293e-45	4.89473e-37	5.91544e-30	3.50734e-24	1.78128e-19	1.22041e-15	1.6329e-12	5.7643e-10	6.85257e-08	3.34255e-06	7.85035e-05	0.00101	0.00794	0.04148	0.155	0.43955	0.99376	1.8655	3.00682	4.27761	5.49452	6.49201	29.2638	22.9095	13.0975	6.48842	3.01466	1.36134	0.60704	0.26918	0.11907	0.05261	0.02324	0.986496
1303.37	0	3.46246e-09	8.90688e-08	1.46224e-06	1.62518e-05	0.000128707	0.000759324	0.00347	0.01269	0.03828	0.09767	0.21555	0.41942	0.73176	1.16154	1.69874	2.31431	2.96516	3.60241	4.17985	4.66062	5.02079	5.25004	5.35012	5.33195	5.21241	5.01133	4.74907	4.44479	14.43	9.45983	5.7784	3.3924	1.94788	1.10465	0.62212	0.34901	0.19537	0.10923	0.06103	0.936917
1315.05	0	4.85851e-05	0.000319106	0.00161	0.00643	0.02101	0.05767	0.13597	0.28084	0.51711	0.86168	1.31663	1.86591	2.47711	3.10728	3.71067	4.24614	4.68235	5.00028	5.19324	5.26504	5.22732	5.09658	4.89159	4.6313	4.33336	4.01329	3.68401	3.35584	10.3936	6.49099	3.8773	2.25848	1.29697	0.73885	0.419	0.23701	0.13387	0.07556	0.04262	0.941533
1317.92	0	3.64304e-16	1.32744e-13	2.02852e-11	1.47462e-09	5.6756e-08	1.26678e-06	1.77194e-05	0.000165977	0.0011	0.00545	0.02088	0.06445	0.16508	0.36048	0.68659	1.16339	1.78358	2.51016	3.28355	4.03492	4.70038	5.23139	5.59991	5.79824	5.83547	5.73226	5.51553	5.21407	17.0331	10.9711	6.44797	3.60885	1.96803	1.05854	0.5652	0.30062	0.15957	0.08461	0.04483	0.990359
1319.17	0	0.00335	0.00959	0.02413	0.05411	0.10949	0.2022	0.34424	0.54517	0.8096	1.13545	1.51348	1.92819	2.35974	2.78652	3.18764	3.54502	3.84481	4.07805	4.24061	4.33273	4.35818	4.32331	4.2361	4.1054	3.94016	3.74899	3.53977	3.31949	11.0408	7.77722	5.2289	3.41478	2.18997	1.38869	0.87441	0.54817	0.34272	0.21391	0.13337	0.874754
1321.24	0	0.000177042	0.000678155	0.00223	0.00637	0.0161	0.03645	0.07475	0.14033	0.2434	0.39339	0.59685	0.8558	1.16667	1.52029	1.90277	2.29717	2.68543	3.05027	3.37675	3.6533	3.87224	4.02978	4.12564	4.16247	4.14514	4.08001	3.97429	3.83546	13.5369	10.3139	7.35903	5.03528	3.35451	2.19709	1.42353	0.916	0.58684	0.37492	0.2391	0.935851
1329.31	0	2.93528e-09	1.04799e-07	2.18417e-06	2.87043e-05	0.000254072	0.0016	0.00756	0.02781	0.08265	0.20469	0.43363	0.80386	1.32949	1.99461	2.75347	3.54028	4.28407	4.92267	5.41219	5.73053	5.87589	5.86224	5.71372	5.45927	5.12845	4.74856	4.34298	3.93057	11.881	7.02188	3.9309	2.13827	1.14565	0.60893	0.3223	0.17021	0.08978	0.04733	0.02494	0.944655
1332.64	0	1.26353e-07	2.23591e-06	2.60503e-05	0.000211585	0.00126	0.00572	0.02063	0.06087	0.15117	0.32358	0.60935	1.02772	1.57641	2.22849	2.93667	3.64314	4.29096	4.83344	5.23972	5.49606	5.60407	5.57695	5.43526	5.20301	4.90455	4.56245	4.19627	3.82202	11.7526	7.17018	4.14868	2.33205	1.29043	0.70797	0.38662	0.2106	0.11456	0.06227	0.03383	0.927631
1333.17	0	0.03341	0.07928	0.16642	0.31375	0.53825	0.84998	1.24819	1.71974	2.24057	2.77944	3.30278	3.77944	4.18427	4.50018	4.71856	4.83863	4.8659	4.81039	4.68481	4.503	4.27875	4.02491	3.75284	3.47219	3.19083	2.91492	2.64904	2.39647	7.38327	4.65899	2.85757	1.72355	1.02934	0.61118	0.36165	0.21356	0.12597	0.07425	0.04374	0.896999
1338.07	0	0.17465	0.28308	0.43261	0.627	0.86639	1.14684	1.46047	1.79625	2.14107	2.48111	2.8031	3.09535	3.34853	3.55603	3.71404	3.8214	3.87924	3.89048	3.85941	3.79119	3.69143	3.56585	3.42	3.25908	3.08782	2.91036	2.73028	2.55058	8.48791	6.08907	4.23309	2.88279	1.93686	1.28985	0.854	0.56329	0.37061	0.24344	0.15974	0.58518
1349.45	0	0.01	0.02865	0.07079	0.15357	0.2973	0.52091	0.83641	1.24416	1.73099	2.27144	2.83191	3.3761	3.87037	4.28768	4.60995	4.82844	4.94294	4.96001	4.89092	4.74971	4.55142	4.31084	4.04157	3.75552	3.46266	3.171	2.8867	2.61428	8.05666	5.0662	3.08607	1.84531	1.09152	0.64158	0.37573	0.21956	0.12815	0.07474	0.04357	0.93506
1353.21	0	9.23024e-10	5.27131e-08	1.56542e-06	2.6748e-05	0.000286313	0.00206	0.01063	0.04125	0.12591	0.31383	0.65905	1.19774	1.9268	2.79675	3.72253	4.60601	5.35945	5.92173	6.26424	6.38823	6.317	6.08675	5.73845	5.31184	4.84176	4.35647	3.87737	3.41951	9.78215	5.32131	2.77181	1.41278	0.71232	0.35721	0.17865	0.08922	0.04453	0.02222	0.01108	0.897164
1354.39	0	1.17792e-07	3.34935e-06	5.43622e-05	0.000550213	0.00374	0.01818	0.06664	0.19252	0.45537	0.91038	1.58031	2.43654	3.40103	4.36747	5.22991	5.90647	6.35128	6.55481	6.53624	6.33286	5.98981	5.55234	5.06078	4.54814	4.0395	3.5525	3.09854	2.68399	7.42256	3.8619	1.94656	0.966	0.47575	0.23344	0.11433	0.05595	0.02736	0.01338	0.00654	0.974631
1355.05	0	1.09646e-07	2.20128e-06	2.81462e-05	0.000244317	0.00152	0.00711	0.02605	0.07732	0.19161	0.40689	0.75699	1.25753	1.8961	2.63147	3.4021	4.13977	4.7831	5.28713	5.6274	5.7992	5.81362	5.69238	5.46266	5.15294	4.79001	4.39725	3.99378	3.59438	10.7737	6.32787	3.54339	1.93439	1.04184	0.55712	0.29678	0.15778	0.08379	0.04447	0.0236	0.982469
1358.92	0	9.67069e-05	0.00079446	0.00461	0.01995	0.06717	0.18286	0.41566	0.81097	1.39007	2.13528	2.98934	3.86904	4.68597	5.36563	5.85923	6.14684	6.23385	6.1438	5.91052	5.57126	5.16177	4.71332	4.2513	3.79502	3.35819	2.94977	2.57491	2.23589	6.25053	3.34096	1.74046	0.89492	0.45711	0.2327	0.11826	0.06005	0.03048	0.01546	0.00785	0.898016
1364.75	0	1.26622e-09	6.60433e-08	1.82827e-06	2.95988e-05	0.000304109	0.00212	0.01071	0.04088	0.12343	0.30548	0.63897	1.15928	1.86503	2.71072	3.61623	4.48757	5.23921	5.80994	6.16928	6.3156	6.26916	6.06352	5.7377	5.33021	4.87537	4.4014	3.92997	3.47663	10.0122	5.50315	2.89317	1.48727	0.75597	0.38207	0.19255	0.0969	0.04873	0.0245	0.01231	0.926421
1378.37	0	8.19561e-12	1.00091e-09	5.6456e-08	1.65891e-06	2.80902e-05	0.000298365	0.00214	0.01094	0.04225	0.12846	0.31904	0.668	1.21089	1.9437	2.81603	3.74225	4.62415	5.37435	5.93235	6.27021	6.38974	6.31462	6.08127	5.73071	5.30264	4.83177	4.34625	3.86732	11.2303	6.2068	3.25865	1.66739	0.84227	0.42275	0.2115	0.10565	0.05273	0.02631	0.01312	0.935402
1380.1	0	0.00878	0.03177	0.09298	0.22696	0.47448	0.86893	1.42119	2.11063	2.8868	3.68066	4.4201	5.044	5.51097	5.8021	5.91875	5.87753	5.70441	5.42942	5.08255	4.69101	4.27779	3.86117	3.45483	3.06837	2.70794	2.37701	2.07698	1.80774	5.10351	2.79473	1.49989	0.79649	0.42061	0.22147	0.11643	0.06116	0.03212	0.01686	0.00885	0.765922
1380.8	0	1.27048e-93	8.9159e-72	5.84934e-55	5.15927e-42	4.76283e-32	2.23366e-24	1.79547e-18	6.30797e-14	1.99071e-10	9.81615e-08	1.15531e-05	0.000448163	0.00733	0.06095	0.2988	0.96844	2.27199	4.14375	6.21428	8.00686	9.17241	9.59457	9.35552	8.64109	7.65435	6.56516	5.49275	4.50836	10.6925	4.07289	1.4718	0.52205	0.18397	0.06468	0.02272	0.00798	0.0028	0.000983995	0.000345526	0.965016
1381.7	0	3.53182e-22	6.14117e-18	1.82699e-14	1.27884e-11	2.7319e-09	2.20142e-07	7.9506e-06	0.000148102	0.0016	0.01094	0.05159	0.17851	0.47833	1.038	1.8931	2.99219	4.20395	5.3614	6.31469	6.96716	7.28574	7.29095	7.03755	6.59484	6.03182	5.4082	4.77062	4.15233	11.3832	5.65471	2.662	1.22303	0.55577	0.25131	0.11338	0.0511	0.02302	0.01037	0.00467	0.952922
1382.31	0	8.00876e-32	1.49266e-25	1.80456e-20	2.37604e-16	5.18468e-13	2.63326e-10	4.09478e-08	2.43098e-06	6.58051e-05	0.000937319	0.00789	0.04319	0.16606	0.47839	1.08838	2.04213	3.27448	4.61969	5.87274	6.85924	7.47839	7.70991	7.59567	7.21228	6.6464	5.97805	5.27208	4.57583	12.371	5.93664	2.68282	1.18119	0.51422	0.22277	0.09631	0.0416	0.01796	0.00775	0.00335	0.952198
1383.5	0	7.4752e-81	1.57813e-63	7.38015e-50	4.51152e-39	1.46293e-30	7.59899e-24	1.51233e-18	2.29464e-14	4.56687e-11	1.8277e-08	2.05662e-06	8.45674e-05	0.00156	0.01517	0.08834	0.3416	0.95215	2.04407	3.56459	5.26949	6.83245	7.98427	8.59285	8.66446	8.29786	7.62955	6.79286	5.89607	15.5328	6.87464	2.80624	1.10986	0.43358	0.16858	0.06542	0.02537	0.00984	0.00381	0.00148	0.949442
1386.72	0	1.97754e-18	2.00287e-15	7.04916e-13	1.01168e-10	6.77598e-09	2.37332e-07	4.78583e-06	6.02764e-05	0.00050814	0.00304	0.01359	0.04735	0.13341	0.31372	0.63251	1.11878	1.77047	2.54892	3.38636	4.20221	4.92117	5.48669	5.86728	6.05615	6.06625	5.92365	5.66087	5.31164	17.0193	10.6023	6.03056	3.27182	1.73219	0.90554	0.47031	0.24344	0.12579	0.06494	0.03351	0.996654
1431.23	0	1.07443e-56	3.09362e-47	2.54801e-39	1.07214e-32	3.74454e-27	1.62934e-22	1.24069e-18	2.19664e-15	1.14659e-12	2.1508e-10	1.70983e-08	6.60788e-07	1.39186e-05	0.00017582	0.00144	0.00823	0.03458	0.11218	0.29276	0.63621	1.18535	1.94058	2.85006	3.82113	4.74594	5.52847	6.10301	6.44049	24.9624	18.3229	10.9768	5.94155	3.05862	1.53608	0.76213	0.37588	0.18484	0.09077	0.04454	0.986708
1436.46	0	3.98295e-17	1.02132e-13	6.11036e-11	1.11499e-08	7.70853e-07	2.4064e-05	0.000391045	0.00371	0.02268	0.09622	0.30274	0.74491	1.49813	2.55381	3.80218	5.06723	6.16852	6.97364	7.42162	7.51831	7.31586	6.88896	6.31561	5.66496	4.9917	4.33511	3.72062	3.16261	8.31237	3.91706	1.77784	0.79362	0.35169	0.15535	0.06852	0.0302	0.01331	0.00587	0.00258	0.962773
1451.78	0	3.55117e-37	6.23451e-29	1.86831e-22	2.28749e-17	2.2713e-13	3.13274e-10	9.14973e-08	7.86327e-06	0.000256834	0.00389	0.032	0.16162	0.55374	1.39327	2.74367	4.44928	6.18771	7.62193	8.53125	8.85475	8.65995	8.08208	7.26995	6.35265	5.42603	4.55226	3.76579	3.0809	7.41074	2.98425	1.16102	0.44578	0.1703	0.06494	0.02474	0.00942	0.00359	0.00137	0.000520712	0.997863
1452.92	0	4.57945e-12	1.80104e-09	2.2059e-07	1.05137e-05	0.00023301	0.00277	0.01983	0.09393	0.31774	0.81751	1.6842	2.89735	4.30706	5.68896	6.82941	7.58931	7.92404	7.86754	7.50071	6.92069	6.21917	5.47111	4.7312	4.0352	3.40347	2.84501	2.36105	1.94804	4.84457	2.11454	0.90362	0.38272	0.16149	0.06803	0.02864	0.01206	0.00507	0.00213	0.000898425	0.987239
1453.53	0	2.56534e-15	4.50006e-12	1.82924e-09	2.28766e-07	1.10368e-05	0.000246079	0.00293	0.02096	0.09892	0.33313	0.85266	1.74696	2.98862	4.4186	5.80595	6.93574	7.67233	7.97696	7.8894	7.49482	6.89273	6.17556	5.41786	4.67332	3.97654	3.34673	2.79193	2.31261	5.78023	2.5299	1.0793	0.45553	0.19139	0.08026	0.03363	0.01409	0.0059	0.00247	0.00104	0.994047
1454.45	0	2.56546e-12	6.48779e-10	6.13853e-08	2.5769e-06	5.51809e-05	0.000675959	0.00521	0.02728	0.1038	0.30282	0.70884	1.38267	2.3193	3.43415	4.58696	5.62702	6.43485	6.94459	7.14525	7.06797	6.7684	6.31061	5.75568	5.15522	4.54898	3.96498	3.42114	2.92739	7.83986	3.83686	1.81385	0.84392	0.38977	0.17942	0.08246	0.03787	0.01739	0.00798	0.00366	0.97079
1455.12	0	2.82116e-33	3.36853e-26	1.42831e-20	4.26086e-16	1.53993e-12	1.03814e-09	1.83734e-07	1.11797e-05	0.000289262	0.00377	0.02819	0.13513	0.45263	1.13628	2.26317	3.74454	5.34099	6.76592	7.79649	8.3302	8.38011	8.03521	7.41551	6.63841	5.80048	4.97152	4.19615	3.49874	8.74636	3.74369	1.5382	0.62172	0.24965	0.09998	0.04	0.016	0.0064	0.00256	0.00102	0.980571
1457.82	0	2.57974e-09	2.02376e-07	7.1978e-06	0.000133145	0.00143	0.00986	0.04676	0.16306	0.44084	0.96571	1.77816	2.83701	4.02212	5.1737	6.14287	6.8286	7.19059	7.24196	7.03159	6.62508	6.08978	5.4853	4.8592	4.24607	3.66886	3.14102	2.66884	2.25359	5.89562	2.80221	1.29852	0.59481	0.27104	0.12321	0.05595	0.0254	0.01152	0.00523	0.00237	0.961667
1458.76	0	4.23531e-18	3.82474e-14	5.37503e-11	1.71624e-08	1.67963e-06	6.38057e-05	0.00113	0.01093	0.06433	0.2545	0.73123	1.62456	2.93615	4.49763	6.03529	7.28532	8.08143	8.37966	8.23364	7.75038	7.05021	6.24092	5.40591	4.60239	3.86474	3.20995	2.64294	2.16102	5.25093	2.19021	0.8924	0.3602	0.14484	0.05815	0.02333	0.00936	0.00375	0.00151	0.000604046	0.97911
1460.52	0	3.91063e-57	9.46996e-47	3.26812e-38	3.42229e-31	2.02428e-25	1.12731e-20	8.99587e-17	1.45259e-13	6.29988e-11	9.25367e-09	5.56394e-07	1.59871e-05	0.000249191	0.00234	0.01441	0.06258	0.20345	0.52025	1.09061	1.93982	3.01223	4.18157	5.29218	6.20615	6.8348	7.14749	7.16263	6.93034	22.6466	13.4899	6.96663	3.36759	1.5791	0.73022	0.33552	0.15372	0.07033	0.03216	0.0147	0.96245
1470.04	0	1.33389e-15	3.68466e-12	2.01997e-09	3.0489e-07	1.64091e-05	0.000386177	0.00467	0.03305	0.15174	0.49164	1.20347	2.3518	3.83621	5.41449	6.80665	7.80051	8.30271	8.33112	7.97546	7.3539	6.58103	5.75073	4.93069	4.16414	3.47466	2.87167	2.35526	1.92	4.6456	1.93095	0.78626	0.31752	0.1278	0.05137	0.02064	0.00829	0.00333	0.00134	0.000536921	0.984145
1470.53	0	1.16835e-13	4.24986e-11	5.60355e-09	3.17852e-07	8.93156e-06	0.000139687	0.00134	0.00853	0.03861	0.13136	0.35227	0.77455	1.4435	2.3443	3.39544	4.47156	5.44124	6.20062	6.69137	6.90187	6.85701	6.60388	6.1982	5.69441	5.13969	4.57136	4.01669	3.49389	9.6588	4.94178	2.42046	1.16133	0.5518	0.26099	0.12317	0.05807	0.02737	0.01289	0.00607	0.896533
1471.35	0	0.00293	0.01098	0.03378	0.08776	0.19672	0.38807	0.68528	1.09932	1.62275	2.22887	2.87621	3.51637	4.10261	4.59673	4.97311	5.21971	5.33679	5.33414	5.22792	5.03762	4.78353	4.48497	4.15915	3.82056	3.48085	3.14892	2.83121	2.53209	7.57578	4.53382	2.63233	1.50262	0.84964	0.47788	0.26798	0.15003	0.08392	0.04691	0.02622	0.874073
1473.53	0	8.80642e-43	1.05711e-32	6.272e-25	6.19805e-19	2.60341e-14	9.57141e-11	5.37164e-08	7.05092e-06	0.000299819	0.00529	0.04701	0.24336	0.82552	2.01165	3.78648	5.82885	7.6745	8.95053	9.50247	9.38071	8.75395	7.8215	6.75756	5.68887	4.69425	3.81413	3.06228	2.43613	5.54064	2.03949	0.7317	0.26013	0.09218	0.03263	0.01155	0.00408	0.00144	0.000511147	0.000180818	0.991673
1474.03	0	1.13825e-06	2.63524e-05	0.000348752	0.0029	0.01629	0.06624	0.20557	0.50932	1.04632	1.83957	2.84183	3.94333	5.00569	5.90216	6.54633	6.90214	6.97832	6.81452	6.46601	5.99111	5.44289	4.86497	4.29023	3.74147	3.23296	2.77236	2.36244	2.00266	5.30159	2.58437	1.23198	0.58118	0.27283	0.12778	0.05979	0.02796	0.01307	0.00611	0.00286	0.918539
1474.6	0	6.65199e-07	1.47722e-05	0.000193309	0.00162	0.00936	0.03949	0.12791	0.33198	0.71551	1.31973	2.1365	3.10101	4.10806	5.04202	5.80569	6.33788	6.61744	6.65709	6.49222	6.16945	5.73726	5.2399	4.71411	4.18811	3.682	3.20885	2.77618	2.38727	6.51002	3.32229	1.64945	0.80806	0.39331	0.19084	0.09246	0.04476	0.02166	0.01048	0.00507	0.985958
1475.74	0	9.81905e-13	3.20309e-10	3.68316e-08	1.79409e-06	4.30059e-05	0.000573483	0.00471	0.02582	0.10155	0.30314	0.7205	1.41865	2.39153	3.54721	4.7349	5.7949	6.60355	7.09602	7.26604	7.15093	6.81213	6.31811	5.7326	5.10839	4.48526	3.89057	3.34123	2.84606	7.54799	3.63635	1.6944	0.77765	0.35446	0.16106	0.07308	0.03314	0.01502	0.00681	0.00309	0.981166
1476.37	0	6.95908e-09	4.33948e-07	1.28845e-05	0.000206826	0.00199	0.01257	0.05573	0.18454	0.47958	1.01972	1.83644	2.88294	4.04036	5.15616	6.09067	6.75026	7.09828	7.14787	6.94551	6.5534	6.03554	5.44891	4.83923	4.2401	3.67405	3.15457	2.6882	2.27662	5.99567	2.8825	1.35058	0.62536	0.288	0.1323	0.06071	0.02784	0.01277	0.00585	0.00268	0.979065
1476.88	0	4.18142e-09	2.3968e-07	6.84143e-06	0.000109048	0.00107	0.00695	0.03214	0.11169	0.30566	0.6851	1.29993	2.14652	3.1569	4.21601	5.19608	5.99021	6.53253	6.80237	6.81656	6.61627	6.25386	5.78254	5.24983	4.69432	4.14496	3.62174	3.13715	2.69784	7.33199	3.69859	1.80753	0.87013	0.41587	0.19809	0.0942	0.04476	0.02126	0.0101	0.0048	0.932086
1481.91	0	1.07646e-18	5.37584e-16	1.15737e-13	1.2022e-11	6.63891e-10	2.11913e-08	4.20259e-07	5.51177e-06	5.0464e-05	0.000338062	0.00173	0.00696	0.02287	0.06289	0.14816	0.30526	0.5599	0.92845	1.41077	1.9873	2.62166	3.26748	3.87685	4.40803	4.83051	5.12717	5.29377	5.33667	19.8628	15.1265	10.0671	6.20847	3.6682	2.11581	1.20406	0.68005	0.38247	0.2146	0.12025	0.99886
1484.34	0	1.36907e-07	3.23144e-06	4.6014e-05	0.000426486	0.00274	0.01295	0.04696	0.13614	0.32646	0.66648	1.18719	1.88406	2.71146	3.59237	4.43783	5.1673	5.72317	6.07651	6.22532	6.18825	5.99664	5.68723	5.29666	4.85779	4.39794	3.93829	3.49427	3.07624	8.80283	4.82544	2.54653	1.31813	0.67562	0.34457	0.17529	0.08906	0.04522	0.02295	0.01165	0.981818
1484.87	0	2.02141e-25	2.01835e-20	2.3336e-16	4.6771e-13	2.25421e-10	3.40502e-08	1.99625e-06	5.39772e-05	0.000774002	0.00659	0.03663	0.14323	0.41989	0.9721	1.85515	3.02303	4.32989	5.582	6.60422	7.28569	7.5923	7.55313	7.23572	6.72192	6.09045	5.40724	4.72197	4.06847	10.9	5.21135	2.36656	1.05071	0.46192	0.2022	0.08834	0.03857	0.01683	0.00734	0.0032	0.933496
1486.28	0	2.75067e-28	8.0417e-22	9.05601e-17	8.00807e-13	9.69594e-10	2.47847e-07	1.87137e-05	0.000541119	0.00733	0.05441	0.25076	0.79208	1.85551	3.43297	5.2737	6.99891	8.28022	8.95156	9.01703	8.59381	7.84308	6.91926	5.94445	5.00212	4.14144	3.38565	2.7405	2.20116	5.13159	1.98441	0.74967	0.28075	0.1048	0.03907	0.01456	0.00543	0.00202	0.000753042	0.000280554	0.990108
1489.91	0	6.39665e-25	9.35592e-21	2.97735e-17	2.62621e-14	7.86689e-12	9.48732e-10	5.31104e-08	1.55474e-06	2.63013e-05	0.000279672	0.00201	0.01032	0.04002	0.12224	0.30507	0.64185	1.16909	1.88533	2.74361	3.66135	4.54205	5.29841	5.86858	6.22253	6.35978	6.30208	6.0844	5.74693	18.487	11.3884	6.32594	3.33514	1.71281	0.86815	0.43714	0.21939	0.10992	0.05503	0.02754	0.996052
1496.47	0	1.51956e-08	1.2324e-06	4.20055e-05	0.000708224	0.00673	0.04016	0.16384	0.49061	1.14285	2.17133	3.49721	4.92771	6.23166	7.22126	7.79793	7.95455	7.75	7.27614	6.63028	5.89808	5.14597	4.42016	3.74923	3.14807	2.62179	2.16919	1.78524	1.46299	3.60004	1.55404	0.66053	0.27893	0.11747	0.04941	0.02077	0.00873	0.00367	0.00154	0.000648375	0.911661
1499.68	0	5.91805e-06	0.000117927	0.00134	0.00959	0.04672	0.16591	0.45366	1	1.84589	2.94437	4.16531	5.33923	6.31181	6.98209	7.3141	7.32729	7.07671	6.63279	6.06587	5.4369	4.79351	4.16961	3.58707	3.05813	2.58795	2.17683	1.82195	1.51874	3.88479	1.7956	0.81651	0.36858	0.16583	0.0745	0.03345	0.01501	0.00674	0.00302	0.00136	0.898858
1504.4	0	3.06292e-11	5.78939e-09	4.19066e-07	1.37783e-05	0.000236424	0.00237	0.01527	0.0682	0.22506	0.57884	1.21238	2.14449	3.30119	4.53371	5.66965	6.5658	7.13934	7.37236	7.29769	6.97783	6.48538	5.88934	5.24738	4.60323	3.98708	3.41762	2.90462	2.45148	6.39164	3.00924	1.37783	0.62302	0.28014	0.12565	0.05629	0.02521	0.01128	0.00505	0.00226	0.967886
1508.39	0	0	0	6.84967e-255	6.38501e-181	2.6024e-128	6.82287e-91	2.80313e-64	2.37908e-45	6.90785e-32	2.59864e-22	1.67949e-15	1.17229e-10	3.26621e-07	9.18333e-05	0.00501	0.08339	0.58525	2.18076	5.1164	8.57559	11.2705	12.4334	12.0971	10.758	8.97195	7.14732	5.51079	4.15125	8.14353	2.20119	0.57126	0.14671	0.03758	0.00962	0.00246	0.000629921	0.000161197	4.12504e-05	1.0556e-05	0.984043
1513.74	0	4.47912e-14	5.26692e-12	3.24096e-10	1.13704e-08	2.44908e-07	3.45253e-06	3.3671e-05	0.000238376	0.00128	0.00537	0.01832	0.05202	0.12607	0.26622	0.4989	0.84296	1.302	1.86046	2.48511	3.13114	3.75051	4.29982	4.74611	5.06949	5.26315	5.33141	5.28678	5.14682	17.9645	12.7682	8.17483	4.93441	2.88139	1.65156	0.93683	0.52831	0.29696	0.16662	0.09339	0.979968
1536.27	0	2.36226e-24	7.58727e-21	8.06816e-18	3.30265e-15	5.92523e-13	5.20927e-11	2.47037e-09	6.86329e-08	1.19951e-06	1.40243e-05	0.000115685	0.000705066	0.0033	0.01234	0.03779	0.09758	0.21723	0.42534	0.74521	1.18595	1.73671	2.36672	3.03081	3.67811	4.26101	4.74207	5.09753	5.31791	21.0465	17.0316	11.6746	7.28939	4.31996	2.4868	1.40857	0.7907	0.44165	0.246	0.13681	0.976054
1581.26	0	2.6813e-104	5.94044e-79	1.08241e-59	4.68724e-45	6.21625e-34	1.76133e-25	4.66592e-19	3.54797e-14	1.816e-10	1.19468e-07	1.64729e-05	0.000687558	0.01145	0.09368	0.44238	1.36507	3.03309	5.23392	7.43847	9.11133	9.96139	9.9856	9.36894	8.35811	7.17549	5.98279	4.87866	3.91159	8.87189	3.15687	1.07587	0.36139	0.12081	0.04032	0.01345	0.00449	0.0015	0.000498891	0.000166373	0.962852
1584.34	0	6.0666e-84	1.72442e-66	1.30488e-52	1.41869e-41	8.46852e-33	8.05917e-26	2.85415e-20	7.38064e-16	2.38143e-12	1.46711e-09	2.41689e-07	1.38882e-05	0.000343246	0.00431	0.0313	0.14653	0.48153	1.1905	2.34233	3.83784	5.43159	6.83814	7.8409	8.34485	8.36873	8.0045	7.37272	6.58988	18.2894	8.64408	3.69702	1.51865	0.6138	0.24648	0.09872	0.0395	0.0158	0.00632	0.00253	0.983108
1591.04	0	1.10864e-52	4.50558e-40	2.07054e-30	5.25284e-23	2.47953e-17	5.52532e-13	1.18599e-09	4.22992e-07	3.79583e-05	0.00117	0.01587	0.11261	0.48349	1.40339	3.00469	5.08112	7.1593	8.76216	9.62087	9.71714	9.20385	8.29798	7.20314	6.07357	5.00818	4.05962	3.24783	2.57237	5.78219	2.07791	0.72683	0.25187	0.087	0.03002	0.01035	0.00357	0.00123	0.000424592	0.000146414	0.983309
1597.72	0	5.88993e-45	4.37985e-36	6.46291e-29	4.01511e-23	1.92864e-18	1.17051e-14	1.33436e-11	3.93299e-09	3.87478e-07	1.56776e-05	0.000307327	0.00334	0.02232	0.10069	0.32902	0.82654	1.67606	2.85528	4.222	5.56508	6.68245	7.44018	7.79195	7.76573	7.43525	6.89145	6.22188	5.49931	15.2526	7.45902	3.37323	1.47507	0.63582	0.27239	0.11639	0.04967	0.02119	0.00904	0.00385	0.991581
1598.72	0	6.16817e-61	5.3209e-44	1.12526e-31	1.04984e-22	3.5405e-16	1.99457e-11	5.71684e-08	1.87148e-05	0.00125	0.0261	0.22805	1.04206	2.93686	5.78008	8.72226	10.8225	11.6306	11.2497	10.0746	8.52875	6.92976	5.46454	4.21617	3.20171	2.40337	1.78896	1.32348	0.97475	1.9026	0.54036	0.15211	0.04271	0.01198	0.00336	0.000943141	0.000264569	7.42162e-05	2.08189e-05	5.84007e-06	0.993663
1600.55	0	3.09136e-75	5.13853e-55	3.86748e-40	3.40646e-29	3.84213e-21	3.22638e-15	7.36474e-11	1.18433e-07	2.69742e-05	0.00145	0.02641	0.21468	0.94866	2.65015	5.24919	8.04205	10.177	11.1753	11.048	10.106	8.72937	7.22804	5.80127	4.55043	3.50944	2.6731	2.0175	1.51245	3.04811	0.91128	0.26857	0.07882	0.0231	0.00677	0.00198	0.000581131	0.000170257	4.98811e-05	1.46139e-05	0.972958
1607.14	0	8.53973e-25	6.82956e-20	6.53375e-16	1.11444e-12	4.68261e-10	6.29428e-08	3.3414e-06	8.30225e-05	0.00111	0.00887	0.04678	0.17494	0.49375	1.10687	2.05546	3.27286	4.5968	5.8286	6.79973	7.4125	7.64665	7.54197	7.17216	6.62112	5.96683	5.27289	4.58608	3.9375	10.4822	4.97049	2.24375	0.99133	0.43391	0.18915	0.08231	0.03579	0.01556	0.00676	0.00294	0.945793
1607.83	0	1.61775e-36	1.2157e-28	2.08616e-22	1.797e-17	1.44936e-13	1.79216e-10	5.01394e-08	4.31034e-06	0.000144753	0.00229	0.01989	0.10646	0.38669	1.02979	2.13965	3.64661	5.30698	6.81099	7.90978	8.48467	8.54538	8.18674	7.53822	6.7263	5.85416	4.99554	4.19673	3.48226	8.60855	3.61286	1.45628	0.57774	0.22777	0.08958	0.03519	0.01382	0.00543	0.00213	0.000836913	0.97714
1618.76	0	1.02222e-143	7.44636e-112	5.40029e-87	1.34795e-67	1.83773e-52	1.183e-40	1.93491e-31	2.98941e-24	1.21536e-18	2.89186e-14	7.51209e-11	3.46189e-08	4.1252e-06	0.000170052	0.00304	0.02798	0.15268	0.55006	1.42723	2.8582	4.6676	6.49302	7.96402	8.85039	9.10399	8.81536	8.14165	7.24658	19.5707	8.63905	3.41803	1.29794	0.48539	0.1805	0.06698	0.02483	0.00921	0.00341	0.00126	0.980118
1621.86	0	1.02777e-13	6.43083e-11	1.20677e-08	8.47624e-07	2.66511e-05	0.000433552	0.00411	0.02491	0.10491	0.32718	0.79768	1.58947	2.68514	3.96326	5.23902	6.32937	7.10537	7.5131	7.56605	7.32255	6.86123	6.26179	5.59346	4.90998	4.24922	3.63511	3.08063	2.59082	6.68794	3.08559	1.38215	0.61114	0.26869	0.11784	0.05162	0.02261	0.0099	0.00433	0.0019	0.93649
1622.29	0	2.12738e-29	3.57068e-23	3.2682e-18	2.9436e-14	4.17492e-11	1.355e-08	1.35327e-06	5.25567e-05	0.000955125	0.00941	0.05657	0.22826	0.66773	1.50784	2.76535	4.29156	5.82562	7.10423	7.95153	8.31023	8.22226	7.7871	7.12195	6.33467	5.51057	4.70944	3.96828	3.30627	8.27306	3.56102	1.47515	0.60166	0.24386	0.09859	0.03982	0.01607	0.00649	0.00262	0.00106	0.986782
1625.65	0	1.71889e-05	0.000187949	0.00139	0.00738	0.02957	0.09321	0.23988	0.5197	0.97318	1.61064	2.40112	3.27666	4.14937	4.93272	5.55902	5.98847	6.20989	6.23555	6.09348	5.8196	5.45143	5.02376	4.56621	4.1023	3.64948	3.21983	2.82096	2.45696	6.90194	3.70632	1.9339	0.99446	0.5076	0.25813	0.13101	0.06643	0.03367	0.01706	0.00864	0.978035
1627.05	0	2.6675e-34	1.84909e-26	2.39665e-20	1.39622e-15	7.24273e-12	5.69676e-09	1.02711e-06	5.84258e-05	0.00134	0.01505	0.0958	0.38936	1.10989	2.3914	4.13338	6.00795	7.62286	8.69474	9.12416	8.97052	8.38143	7.52554	6.55036	5.56496	4.63919	3.81077	3.09444	2.49031	5.81119	2.23951	0.8403	0.31219	0.11556	0.04272	0.01578	0.00583	0.00215	0.000795574	0.000293865	0.995429
1628.85	0	1.22611e-20	4.95745e-17	5.10559e-14	1.67596e-11	2.11312e-09	1.19491e-07	3.44694e-06	5.64683e-05	0.000574628	0.00392	0.01904	0.0697	0.20091	0.47375	0.94375	1.63196	2.50624	3.4845	4.45734	5.31758	5.98402	6.41288	6.59726	6.55886	6.33695	5.97797	5.5278	5.02689	15.0652	8.51138	4.45755	2.24931	1.11459	0.54743	0.26771	0.13065	0.06369	0.03103	0.01512	0.965896
1638.46	0	1.80139e-08	8.58615e-07	2.0764e-05	0.000285281	0.00245	0.01414	0.05891	0.18657	0.4704	0.98092	1.74677	2.72813	3.82111	4.88946	5.80466	6.47597	6.86228	6.96794	6.82961	6.50101	6.04014	5.50055	4.92672	4.35257	3.80188	3.28978	2.82459	2.40962	6.44644	3.17928	1.52524	0.7223	0.33998	0.15957	0.0748	0.03504	0.01641	0.00768	0.0036	0.928252
1643.06	0	7.23749e-61	2.56312e-48	2.65251e-38	2.60646e-30	6.22861e-24	7.66708e-19	8.8485e-15	1.54369e-11	5.9551e-09	6.87033e-07	3.01026e-05	0.000605239	0.00649	0.0419	0.17942	0.55169	1.29881	2.46625	3.93993	5.47902	6.81739	7.75964	8.22417	8.23313	7.87454	7.26189	6.5046	5.69224	15.3563	7.12219	3.05127	1.26548	0.51796	0.21087	0.08566	0.03477	0.01411	0.00572	0.00232	0.930814
1646.6	0	4.87207e-15	1.57756e-12	2.09227e-10	1.30138e-08	4.25468e-07	8.04958e-06	9.56e-05	0.000763675	0.00435	0.0186	0.06221	0.16897	0.38443	0.75239	1.29583	2.00227	2.82172	3.67787	4.48677	5.17499	5.6917	6.01298	6.13943	6.09013	5.89531	5.58982	5.20811	4.78104	14.7266	8.7714	4.85614	2.5891	1.35393	0.70102	0.36112	0.18554	0.0952	0.04881	0.02502	0.954752
1649	0	1.21044e-26	4.57096e-22	3.06623e-18	4.84906e-15	2.28953e-12	3.92955e-10	2.88762e-08	1.041e-06	2.06208e-05	0.000246729	0.00193	0.01056	0.04274	0.13421	0.3404	0.72148	1.31519	2.11244	3.05118	4.03169	4.94424	5.69593	6.2272	6.51607	6.5727	6.42935	6.12959	5.71953	17.9146	10.6083	5.69651	2.915	1.45679	0.71967	0.35351	0.17317	0.08472	0.04142	0.02024	0.982515
1650.18	0	1.07954e-34	2.61808e-27	1.93411e-21	8.9134e-17	4.52905e-13	3.98759e-10	8.70227e-08	6.24397e-06	0.000183998	0.00265	0.02156	0.11024	0.38849	1.01512	2.08643	3.53811	5.14438	6.61488	7.71107	8.3127	8.41984	8.11542	7.51899	6.75078	5.91134	5.07433	4.28747	3.57734	8.94726	3.82682	1.56949	0.63296	0.25356	0.1013	0.04043	0.01613	0.00643	0.00257	0.00102	0.994828
1652.81	0	2.36951e-41	8.69649e-32	2.27936e-24	1.29316e-18	3.75299e-14	1.0854e-10	5.242e-08	6.29555e-06	0.000255262	0.00442	0.03915	0.20469	0.70607	1.75638	3.3804	5.32196	7.16126	8.52522	9.22495	9.26725	8.78691	7.96545	6.97309	5.9411	4.95642	4.06794	3.29666	2.64546	6.12091	2.31597	0.85177	0.31006	0.11244	0.04072	0.01474	0.00534	0.00193	0.000698753	0.000252872	0.964473
1659.07	0	2.35694e-37	6.37093e-30	6.40012e-24	4.50197e-19	3.69815e-15	5.36046e-12	1.91202e-09	2.19232e-07	1.00105e-05	0.000216135	0.00253	0.01804	0.08548	0.29052	0.75294	1.56504	2.71873	4.08234	5.44621	6.60152	7.40393	7.79778	7.80511	7.49737	6.96597	6.30037	5.57574	4.84845	13.1025	6.23943	2.7853	1.20944	0.51901	0.22161	0.09442	0.04019	0.0171	0.00728	0.0031	0.956804
1659.75	0	4.93747e-111	9.88795e-85	1.37091e-64	3.6457e-49	2.36675e-37	2.63103e-28	2.22628e-21	4.49425e-16	5.19134e-12	6.7017e-09	1.61174e-06	0.000106447	0.00259	0.029	0.17745	0.67799	1.79549	3.57751	5.71878	7.71116	9.11911	9.74806	9.64173	8.98426	7.99688	6.87227	5.74883	4.71072	11.0905	4.14931	1.46919	0.51039	0.17615	0.06065	0.02087	0.00718	0.00247	0.000849215	0.000292074	0.968369
1660.05	0	6.34281e-09	2.07048e-07	3.98057e-06	4.8649e-05	0.000403426	0.0024	0.01075	0.03772	0.10752	0.25653	0.52576	0.94636	1.52476	2.23506	3.02246	3.81575	4.54312	5.14574	5.58562	5.8474	5.93549	5.8687	5.67433	5.38292	5.02438	4.62547	4.20851	3.79107	11.3547	6.62965	3.67746	1.9856	1.05702	0.55853	0.29398	0.15442	0.08103	0.04249	0.02228	0.88103
1666.32	0	2.5516e-12	3.53447e-10	2.23873e-08	7.31558e-07	1.36479e-05	0.000158309	0.00123	0.00676	0.02784	0.0897	0.23468	0.5147	0.9724	1.61936	2.42405	3.31613	4.20437	4.99922	5.63105	6.05957	6.27433	6.28912	6.1337	5.84566	5.46384	5.02393	4.55608	4.08399	12.0311	6.77936	3.61251	1.87137	0.95569	0.48457	0.24481	0.12345	0.0622	0.03132	0.01577	0.945755
1670.41	0	1.56444e-36	2.59619e-30	4.0829e-25	8.96622e-21	3.80078e-17	4.075e-14	1.38423e-11	1.79692e-09	1.04168e-07	3.06941e-06	5.12047e-05	0.000529223	0.00365	0.01798	0.06644	0.19311	0.45861	0.91914	1.59765	2.4644	3.43927	4.41363	5.27989	5.95552	6.39511	6.59023	6.56147	6.34743	21.123	13.2827	7.33533	3.79978	1.90756	0.94307	0.46277	0.22626	0.11043	0.05385	0.02625	0.970748
1670.98	0	1.34227e-36	1.08477e-28	1.95791e-22	1.74554e-17	1.44033e-13	1.80713e-10	5.10037e-08	4.40557e-06	0.000148252	0.00235	0.02036	0.10874	0.39411	1.04698	2.16992	3.68909	5.35619	6.85902	7.94937	8.51126	8.55763	8.18587	7.52692	6.70772	5.83128	4.9708	4.17192	3.45862	8.53522	3.57262	1.43678	0.5688	0.22379	0.08784	0.03444	0.0135	0.00529	0.00207	0.000812648	0.986008
1671.61	0	5.28809e-25	4.68003e-20	4.85102e-16	8.81578e-13	3.89469e-10	5.44717e-08	2.98415e-06	7.60221e-05	0.00103	0.00842	0.04495	0.16974	0.48283	1.08901	2.03192	3.24733	4.57391	5.8122	6.79176	7.41292	7.654	7.55412	7.18693	6.6367	5.9819	5.28661	4.59804	3.94757	10.5061	4.97824	2.24532	0.99113	0.43342	0.18877	0.08207	0.03565	0.01548	0.00672	0.00292	0.955418
1674.08	0	1.28511e-15	1.80724e-12	6.5711e-10	7.93057e-08	3.8875e-06	9.11108e-05	0.00117	0.00906	0.04679	0.17263	0.48325	1.07865	2.00002	3.1862	4.48365	5.70138	6.67433	7.30355	7.56432	7.4909	7.15211	6.62845	5.99606	5.31805	4.64154	3.99847	3.40804	2.87974	7.4904	3.48405	1.56722	0.69468	0.30594	0.13436	0.05893	0.02583	0.01132	0.00496	0.00217	0.968621
1674.93	0	1.02171e-30	1.0312e-23	3.04723e-18	5.71116e-14	1.24135e-10	5.00831e-08	5.40404e-06	0.000206846	0.00349	0.0309	0.16348	0.5758	1.46962	2.90847	4.71021	6.51472	7.96011	8.82474	9.06511	8.7722	8.10106	7.21257	6.24044	5.27991	4.3898	3.60021	2.92129	2.3507	5.49342	2.12802	0.8039	0.30085	0.1122	0.04179	0.01556	0.00579	0.00216	0.00080208	0.00029851	0.95625
1675.51	0	2.03976e-16	1.25032e-12	1.18369e-09	2.57644e-07	1.75847e-05	0.000479133	0.00629	0.04621	0.21343	0.68147	1.62213	3.05817	4.79293	6.49024	7.83009	8.62365	8.83906	8.56109	7.93022	7.09246	6.17039	5.25281	4.3959	3.62968	2.9655	2.40282	1.93422	1.54904	3.61393	1.41493	0.54515	0.20875	0.07975	0.03044	0.01161	0.00443	0.00169	0.000644858	0.000246001	0.986466
1687.84	0	3.61171e-16	7.02111e-13	3.26911e-10	4.76329e-08	2.69411e-06	7.03618e-05	0.000976303	0.00807	0.04356	0.16599	0.47537	1.07772	2.01861	3.23522	4.56619	5.81074	6.79667	7.42287	7.66695	7.568	7.20009	6.64805	5.9909	5.29317	4.60233	3.94991	3.35435	2.82427	7.28956	3.3478	1.48821	0.65225	0.28411	0.12343	0.05356	0.02323	0.01007	0.00437	0.00189	0.827061
1688.48	0	1.63349e-23	3.20651e-19	1.13594e-15	9.76475e-13	2.59988e-10	2.62094e-08	1.17989e-06	2.71674e-05	0.000357844	0.00296	0.01659	0.06725	0.20816	0.51458	1.05511	1.85197	2.85695	3.95952	5.02103	5.91499	6.55554	6.90731	6.97961	6.81246	6.46134	5.98459	5.43525	4.8568	14.0064	7.45615	3.70408	1.78126	0.84364	0.39673	0.18594	0.08701	0.04069	0.01902	0.00889	0.973116
1689.28	0	2.13187e-21	1.5611e-16	1.03326e-12	1.03473e-09	2.34636e-07	1.64981e-05	0.000459301	0.00613	0.04548	0.21167	0.67931	1.62232	3.06461	4.80801	6.51308	7.85694	8.64978	8.8605	8.57561	7.93732	7.09288	6.16552	5.24423	4.38508	3.6178	2.95346	2.39122	1.92345	4.5137	1.77494	0.68396	0.26152	0.09971	0.03797	0.01445	0.0055	0.00209	0.000796699	0.000303191	0.979344
1692.78	0	1.22042e-18	1.15213e-14	1.7491e-11	6.14236e-09	6.66393e-07	2.81038e-05	0.000552939	0.00587	0.03783	0.16257	0.50353	1.19669	2.29663	3.70993	5.21673	6.56129	7.54502	8.07399	8.15544	7.86508	7.30876	6.59279	5.80695	5.0181	4.27063	3.59028	2.98889	2.46878	6.11901	2.63082	1.10052	0.45521	0.18742	0.07702	0.03162	0.01298	0.00533	0.00219	0.000897327	0.970323
1693.48	0	2.31295e-28	9.25351e-23	3.23183e-18	1.56214e-14	1.51792e-11	4.00988e-09	3.67348e-07	1.41964e-05	0.000271016	0.0029	0.01939	0.08782	0.2895	0.7358	1.51208	2.6125	3.91839	5.23745	6.37383	7.18707	7.61675	7.67544	7.42438	6.94675	6.32681	5.63737	4.93457	4.25754	11.4096	5.43353	2.45041	1.07923	0.47047	0.20418	0.08844	0.03828	0.01656	0.00716	0.0031	0.968411
1693.93	0	1.92786e-27	2.78514e-22	4.75818e-18	1.41052e-14	9.93286e-12	2.14815e-09	1.75927e-07	6.47157e-06	0.000122909	0.00135	0.00944	0.04533	0.15957	0.4345	0.95693	1.76897	2.83042	4.02082	5.17898	6.1543	6.84443	7.20846	7.25959	7.04722	6.63764	6.09881	5.49085	4.86161	13.7142	7.03009	3.36803	1.56461	0.71673	0.32625	0.14808	0.06712	0.03041	0.01377	0.00624	0.936342
1724.28	0	1.35524e-100	2.13461e-79	1.30545e-62	2.56552e-49	8.63812e-39	1.87538e-30	7.49922e-24	1.26815e-18	1.75143e-14	3.32598e-11	1.31073e-08	1.48238e-06	6.20535e-05	0.00117	0.01176	0.07065	0.28181	0.80937	1.78717	3.19864	4.84176	6.41328	7.63907	8.36265	8.56114	8.31012	7.73298	6.95895	19.4247	9.14431	3.86208	1.56224	0.62126	0.2454	0.09668	0.03805	0.01497	0.00589	0.00232	0.959071

## Sheet: frequency residual
frequency residual of fitted GSD
ϕ	-3	-2.75	-2.5	-2.25	-2	-1.75	-1.5	-1.25	-1	-0.75	-0.5	-0.25	0	0.25	0.5	0.75	1	1.25	1.5	1.75	2	2.25	2.5	2.75	3	3.25	3.5	3.75	4	5	6	7	8
1140.93	0	-3.35974e-06	-2.98843e-05	-0.000197852	-0.00101	-0.00413	-0.01383	-0.039	-0.09459	-0.20117	-0.38146	-0.65444	-1.02886	-0.86545	-0.11027	0.66723	1.3043	1.47466	1.32783	0.94	0.4223	-0.10686	-0.55572	-0.86869	-0.97677	-0.94609	-0.81794	-0.62593	-0.39181	0.86978	2.16719	0.17737	-0.73072
1142.24	0	-0.06025	-0.02803	0.12257	0.15666	0.93293	0.24629	-0.34431	0.69497	0.62058	-1.28229	-1.47793	-0.96826	-0.41154	0.13302	0.55374	0.78624	0.76314	0.5867	0.31234	0.00134	-0.28497	-0.49914	-0.60454	-0.55377	-0.40568	-0.20486	0.00475	0.19105	1.67033	1.2613	0.01498	-0.582
1143.83	0	-0.00245	-0.00672	-0.01644	-0.03626	-0.07282	-0.13453	-0.23054	-0.36937	-0.55712	-0.79604	-1.00036	-0.6446	0.21873	1.02453	1.59704	1.76383	1.44825	0.87675	0.22324	-0.3583	-0.76714	-0.96658	-0.96111	-0.81956	-0.62084	-0.42274	-0.25764	-0.13113	0.3733	1.50876	1.1653	0.00459
1145.41	0	-0.0016	-0.00496	-0.01339	-0.03202	-0.06867	-0.07049	-0.00797	-0.05318	0.18738	-0.63869	-0.82758	-0.26376	0.30134	0.79413	1.0514	0.9945	0.63726	0.17098	-0.27714	-0.61772	-0.80666	-0.83509	-0.70637	-0.47756	-0.20257	0.06402	0.28222	0.43301	1.97281	1.14978	-0.09948	-0.80233
1155.52	0	-2.62108e-06	-2.31051e-05	-0.000152627	-0.000782903	-0.00322	-0.01089	-0.03108	-0.07644	-0.16499	-0.31773	-0.5537	-0.88421	-1.08095	-0.46998	0.4467	1.2722	1.60842	1.57229	1.21082	0.62989	-0.03224	-0.64627	-1.10491	-1.27768	-1.22249	-0.98648	-0.63169	-0.22311	2.19233	2.13163	-0.24741	-0.83275
1160.2	0	-5.82008e-05	-0.000361047	0.23906	0.83024	0.55831	0.32529	0.09907	0.53501	0.33975	-0.58401	-1.25749	-1.38881	-0.9176	-0.32635	0.22013	0.6561	0.74565	0.6192	0.34277	0.0089	-0.28684	-0.47502	-0.51873	-0.40206	-0.20987	-0.00925	0.15139	0.25332	1.12933	0.75438	-0.21574	-0.69792
1172.02	0	-4.6485e-16	-1.45468e-13	-1.98495e-11	-1.32881e-09	-4.8258e-08	-1.03593e-06	-1.41456e-05	-0.000130855	-0.000865652	-0.00429	-0.01659	-0.05179	-0.13455	-0.29848	-0.2692	0.15957	0.34094	0.34578	0.23676	0.08166	-0.06929	-0.17015	-0.18525	-0.16655	-0.08916	0.01816	0.12609	0.21099	0.67472	-0.45859	-0.70129	-0.51885
1174.75	0	-0.03239	0.30892	0.84866	0.42119	0.87619	0.22239	-0.54247	0.01096	-0.79445	-1.21164	-0.81164	-0.29901	0.23261	0.60479	0.70088	0.48363	0.08669	-0.30896	-0.58449	-0.68652	-0.62423	-0.4429	-0.19199	0.06574	0.30132	0.4914	0.62493	0.7014	2.5548	0.98969	-0.68751	-1.19718
1177.42	0	-2.48486e-141	-4.40151e-114	-4.84632e-92	-3.27768e-74	-8.68583e-60	-4.03761e-48	-1.10687e-38	-4.772e-31	-7.15346e-25	-7.08403e-20	-7.7883e-16	-1.44634e-12	-6.36665e-10	-8.72661e-08	0.00424	0.4069	0.62239	0.59361	0.39855	0.11021	-0.22998	-0.57591	-0.76469	-0.83707	-0.67775	-0.27384	0.29288	0.86097	3.6514	-3.3714	-3.06285	-0.56702
1181.9	0	-2.93577e-08	-6.32375e-07	-8.74839e-06	-8.25628e-05	-0.00055995	-0.00285	-0.01137	-0.03663	-0.09818	-0.22461	-0.44825	-0.79524	-1.27482	-1.10635	-0.24011	0.83318	1.53057	1.87968	1.81323	1.35961	0.64144	-0.1767	-0.9334	-1.35839	-1.4999	-1.3983	-1.12543	-0.75813	0.39584	2.04339	0.40512	-0.28479
1186.4	0	-2.01003e-12	-2.12467e-10	-1.12128e-08	-3.26651e-07	-5.72125e-06	-6.47959e-05	-0.000504983	-0.00286	-0.01228	-0.0417	-0.11579	-0.27056	-0.54545	-0.96926	-0.65122	-0.0661	0.32436	0.65449	0.90783	1.03781	0.99355	0.75064	0.3082	-0.16147	-0.56998	-0.85327	-0.98486	-0.97346	-2.27326	0.46178	1.20245	0.53175
1189.2	0	-2.20214e-05	-0.00014971	-0.00078515	-0.00328	-0.01124	-0.03237	-0.08006	-0.17339	-0.33437	-0.58267	-0.92934	-1.18027	-0.69165	0.2041	1.01297	1.61461	1.70972	1.47102	0.99254	0.39335	-0.20602	-0.71183	-1.05991	-1.16206	-1.09807	-0.92131	-0.68376	-0.4253	0.47182	1.81085	0.72552	-0.22444
1191.95	0	-2.84629e-46	-1.57911e-38	-4.79954e-32	-1.28258e-26	-4.47757e-22	-2.84451e-18	-4.33895e-15	-2.00349e-12	-3.3974e-10	-2.48529e-08	-8.96783e-07	-1.7849e-05	-0.000215159	-0.0017	-0.00805	0.10487	0.20601	0.14667	0.01576	-0.11579	-0.20362	-0.2117	-0.09417	-0.05549	-0.02251	0.00847	0.05402	0.12843	1.13912	-0.20373	-1.84274	-1.09378
1194.94	0	-1.98313e-07	-2.72573e-06	-2.6199e-05	-0.000184356	-0.000988461	-0.00418	-0.01439	-0.04136	-0.10165	-0.21798	-0.41514	-0.71308	-1.11969	-1.39171	-0.60071	0.56376	1.38949	1.89589	1.98893	1.65836	0.99262	0.1441	-0.71145	-1.2571	-1.5013	-1.46657	-1.22801	-0.87957	-0.40193	1.32459	0.89035	0.35021
1199.34	0	-3.49928e-06	-2.69515e-05	-0.000160132	-0.000756818	-0.00292	-0.00945	-0.02613	-0.06293	-0.13419	-0.25711	-0.44835	-0.71963	-1.07382	-0.70739	0.11745	0.938	1.36158	1.4788	1.29929	0.88175	0.32604	-0.25537	-0.75704	-1.03554	-1.12599	-1.06117	-0.88485	-0.63663	0.31615	2.714	1.04823	-0.58786
1200.62	0	-4.79955e-10	0.56205	1.40535	0.79034	0.49431	0.36819	0.16644	0.26747	0.18693	-0.04906	-0.264	-0.52571	-0.92697	-1.1009	-0.86737	-0.52838	-0.3456	-0.18727	-0.03878	0.08227	0.14566	0.1346	0.04963	-0.02736	-0.05079	-0.00488	0.10058	0.23502	1.44414	0.13624	-0.87215	-0.77005
1204.26	0	-0.000566876	0.22635	0.94612	1.62823	0.08337	0.00843	-0.00244	0.14195	0.07794	-0.72565	-1.31221	-1.29545	-0.68701	-0.09392	0.30478	0.43283	0.28313	0.08838	-0.03705	-0.05937	-0.01419	0.03278	0.01625	-0.04794	-0.13636	-0.21219	-0.23944	-0.19619	0.62603	1.86029	0.43087	-0.68708
1205.53	0	-2.03054e-10	-7.10261e-09	-1.53972e-07	-2.20013e-06	-2.18623e-05	-0.000158281	-0.00086956	-0.00376	-0.01316	-0.03839	-0.09558	-0.20722	-0.39832	-0.68961	-1.07938	-0.52281	-0.09273	0.29839	0.71515	1.14473	1.42893	1.42394	1.02635	0.36331	-0.38156	-1.04205	-1.48594	-1.64321	-3.48624	2.00757	1.75879	0.38511
1210.12	0	-0.000165744	-0.000764502	-0.0029	-0.00924	-0.02526	-0.06038	-0.08454	0.5908	0.08578	-0.5369	-0.7908	-0.36815	0.17832	0.64079	0.9162	0.92891	0.61705	0.14793	-0.35659	-0.77955	-1.03237	-1.06756	-0.86442	-0.50487	-0.075	0.33694	0.66493	0.87559	3.34281	1.08791	-0.78966	-1.32641
1214.66	0	-7.83484e-07	-8.78811e-06	-7.09086e-05	-0.000429196	-0.00202	0.08858	0.21106	0.05233	-0.01011	-0.25401	-0.52956	-0.87028	-1.31585	-0.95806	-0.06492	0.85243	1.35082	1.53348	1.4048	1.01774	0.46872	-0.12889	-0.66521	-0.95925	-1.051	-0.97989	-0.80525	-0.58369	-0.41628	0.99348	0.69303	0.13242
1292.77	0	-0.0048	-0.01093	-0.02285	-0.04421	-0.07976	-0.13499	-0.21562	-0.3268	-0.47225	-0.65355	-0.86965	-0.58686	0.38729	1.26304	1.73837	1.6567	1.11267	0.40006	-0.26119	-0.73117	-0.9567	-0.95436	-0.76665	-0.52477	-0.28574	-0.09774	0.02129	0.07907	0.3827	0.8847	1.39347	0.64896
1299.64	0	-1.35213e-06	-9.34791e-06	-5.18336e-05	-0.000236004	-0.000901098	-0.00294	-0.00834	-0.02085	-0.04663	-0.09437	-0.17472	-0.29877	-0.47592	-0.54648	0.15251	0.8061	0.94246	0.76479	0.4156	0.03434	-0.27968	-0.47345	-0.52007	-0.47877	-0.37904	-0.25902	-0.1396	-0.02479	0.89338	1.09635	0.02499	-0.24276
1301	0	-2.11092e-52	-1.36999e-43	-3.17836e-36	-4.5546e-30	-6.36774e-25	-1.27271e-20	-5.00403e-17	-5.05265e-14	-1.63628e-11	-2.04497e-09	-1.15029e-07	-3.30945e-06	-5.41778e-05	-0.000551709	0.06191	0.5099	0.68741	0.64253	0.43502	0.11888	-0.25284	-0.6039	-0.80084	-0.90294	-0.82365	-0.56366	-0.16281	0.3031	3.64516	0.04767	-2.77316	-1.52527
1302.34	0	-6.05306e-159	-2.51655e-129	-3.50049e-105	-1.67563e-85	-1.84526e-69	-2.1996e-56	-1.00293e-45	-4.89473e-37	-5.91544e-30	-3.50734e-24	-1.78128e-19	-1.22041e-15	-1.6329e-12	-5.7643e-10	-6.85257e-08	-3.34255e-06	0.02106	0.14621	0.30441	0.36883	0.32482	0.17827	-0.00973	-0.26131	-0.51671	-0.697	-0.71772	-0.53361	1.7158	1.84089	-2.66797	-2.10525
1303.37	0	-3.46246e-09	-8.90688e-08	-1.46224e-06	-1.62518e-05	-0.000128707	-0.000759324	-0.00347	-0.01269	-0.03828	-0.09767	-0.21555	-0.41942	-0.73176	-1.16154	-0.77371	0.01687	0.60053	1.05226	1.32662	1.37579	1.17416	0.74144	0.12362	-0.44635	-0.8906	-1.15316	-1.22392	-1.12848	-1.9918	1.15402	1.33354	0.53119
1315.05	0	-4.85851e-05	-0.000319106	-0.00161	-0.00643	0.24589	1.01764	0.68715	0.34134	0.14396	-0.67148	-1.31661	-1.32385	-0.76235	-0.24706	0.2614	0.72153	0.87504	0.82017	0.58708	0.2394	-0.13779	-0.46438	-0.67403	-0.66996	-0.52251	-0.29438	-0.05475	0.14282	1.11436	0.59531	-0.08396	-0.40764
1317.92	0	-3.64304e-16	-1.32744e-13	-2.02852e-11	-1.47462e-09	-5.6756e-08	-1.26678e-06	-1.77194e-05	-0.000165977	-0.0011	-0.00545	-0.02088	-0.06445	-0.16508	-0.36048	-0.5895	-0.13151	0.17168	0.36987	0.49559	0.53136	0.45605	0.26885	-0.00803	-0.29121	-0.47756	-0.523	-0.42418	-0.21671	1.01773	0.52153	-0.78286	-0.62019
1319.17	0	-0.00335	-0.00959	-0.02413	-0.05411	-0.10949	-0.2022	-0.28505	0.5899	-0.5932	-1.05424	-1.05998	-0.35036	0.34237	0.97088	1.39166	1.48647	1.19783	0.71068	0.15597	-0.35216	-0.73692	-0.96786	-1.04215	-0.96639	-0.80103	-0.58191	-0.3344	-0.07502	1.87641	2.37708	0.36441	-0.57425
1321.24	0	-0.000177042	-0.000678155	-0.00223	-0.00637	-0.0161	-0.03645	-0.02545	0.80521	0.04275	-0.31108	-0.59681	-0.85576	-1.16664	-0.90972	-0.01323	0.93688	1.42584	1.52563	1.2594	0.73012	0.09158	-0.50377	-0.92663	-1.07327	-1.01076	-0.80768	-0.54135	-0.27485	0.6285	1.59727	1.22642	0.3142
1329.31	0	-2.93528e-09	-1.04799e-07	-2.18417e-06	-2.87043e-05	-0.000254072	-0.0016	-0.00756	-0.02781	-0.08265	-0.20469	-0.43363	-0.45625	-0.19946	-0.07584	-0.03802	0.04656	0.11441	0.30115	0.57352	0.82228	0.91975	0.77495	0.34379	-0.15207	-0.60712	-0.92725	-1.07186	-1.05264	-2.53589	-0.09803	1.04273	1.04498
1332.64	0	-1.26353e-07	-2.23591e-06	-2.60503e-05	-0.000211585	-0.00126	-0.00572	-0.02063	-0.06087	-0.15117	-0.32358	-0.60935	-0.99071	-0.83793	-0.30441	0.18477	0.75325	1.09688	1.27159	1.23742	0.99349	0.58477	0.08077	-0.44725	-0.79604	-0.98567	-1.02834	-0.96139	-0.82927	-1.84162	0.1224	1.18093	1.00817
1333.17	0	0.47997	1.50632	0.17064	0.06838	0.08148	-0.35416	-0.82162	-0.86866	-0.78157	-1.07588	-0.40725	0.24286	0.77223	1.02538	0.9476	0.56144	0.09742	-0.29518	-0.5333	-0.60313	-0.53887	-0.39465	-0.22079	-0.03685	0.12489	0.24652	0.31864	0.34151	0.87759	0.08563	-0.23795	-0.34583
1338.07	0	0.48996	2.0197	0.70666	0.48871	-0.17955	-0.59031	-0.9539	-0.78679	-0.98994	-2.03263	-1.89149	-0.85407	0.22242	1.20142	1.84623	1.99557	1.67558	1.11978	0.49436	-0.07748	-0.52808	-0.84177	-1.02639	-1.05837	-1.00342	-0.88776	-0.73076	-0.54547	-0.16328	1.83633	1.44141	0.35997
1349.45	0	-0.01	-0.02865	0.06289	0.31102	0.22324	-0.08424	-0.42356	-0.48704	-0.30278	-0.97295	-0.45996	0.22975	0.87419	1.23138	1.17766	0.70681	0.0899	-0.44665	-0.75926	-0.80413	-0.62815	-0.33357	-0.04201	0.15503	0.23495	0.20979	0.1184	0.00777	-0.51013	0.03635	0.3095	0.13552
1353.21	0	-9.23024e-10	-5.27131e-08	-1.56542e-06	-2.6748e-05	-0.000286313	-0.00206	-0.01063	-0.04125	-0.12591	-0.31383	-0.65905	-1.19774	-1.14948	-0.42539	0.35987	1.17459	1.58659	1.69956	1.49142	0.99914	0.3241	-0.4056	-1.06426	-1.37778	-1.42682	-1.26911	-0.99452	-0.69123	-0.78589	0.59607	1.20165	0.93889
1354.39	0	-1.17792e-07	-3.34935e-06	-5.43622e-05	-0.000550213	-0.00374	-0.01818	-0.03021	0.50635	-0.19182	-0.7888	-0.92355	-0.36657	0.08217	0.47184	0.7499	0.86697	0.69374	0.40186	0.06715	-0.23942	-0.46068	-0.5701	-0.5698	-0.41522	-0.21458	-0.0307	0.0921	0.13835	0.02419	-0.23905	0.10217	0.1538
1355.05	0	-1.09646e-07	-2.20128e-06	-2.81462e-05	-0.000244317	-0.00152	0.26982	0.71982	0.4977	0.53473	-0.19793	-0.75695	-1.00211	-0.71937	-0.25793	0.13508	0.43498	0.42403	0.27542	0.07689	-0.09429	-0.19063	-0.20056	-0.14395	-0.02667	0.09058	0.16483	0.17535	0.12768	-0.33173	-0.36201	-0.06354	-0.07854
1358.92	0	-9.67069e-05	0.28202	0.81341	0.76302	1.03559	0.59655	0.10116	0.61071	-0.46288	-1.76301	-2.06448	-1.43662	-0.74599	-0.0011	0.64701	1.03655	1.00478	0.72404	0.31368	-0.09532	-0.39637	-0.5393	-0.52461	-0.34556	-0.1328	0.04293	0.14226	0.16241	0.15276	0.12142	0.23683	0.11063
1364.75	0	-1.26622e-09	-6.60433e-08	-1.82827e-06	-2.95988e-05	-0.000304109	-0.00212	0.06497	1.41044	0.02119	-0.26388	-0.63893	-1.15924	-1.46157	-0.88245	-0.00487	0.83563	1.20153	1.26094	1.06342	0.69319	0.24864	-0.19015	-0.57729	-0.76205	-0.81984	-0.78777	-0.70446	-0.59834	-1.33481	0.24948	0.85905	0.65206
1378.37	0	-8.19561e-12	-1.00091e-09	-5.6456e-08	-1.65891e-06	-2.80902e-05	-0.000298365	-0.00214	-0.01094	-0.04225	-0.12846	-0.31904	-0.668	-1.15235	-0.83852	-0.19173	0.5526	1.02712	1.31635	1.36619	1.15655	0.7241	0.14721	-0.48375	-0.89587	-1.10497	-1.12324	-1.00185	-0.80574	-1.46516	0.12375	0.84549	0.83306
1380.1	0	0.18779	0.9893	1.12558	0.69049	1.29309	0.3595	-0.93457	-0.86764	-1.55502	-2.5379	-1.8265	-0.78508	0.31719	1.22766	1.71643	1.65395	1.20077	0.59371	0.00682	-0.44436	-0.71293	-0.8149	-0.79713	-0.66677	-0.51838	-0.38696	-0.28735	-0.21711	-0.39242	0.3765	0.56867	0.42119
1380.8	0	-1.27048e-93	-8.9159e-72	-5.84934e-55	-5.15927e-42	-4.76283e-32	-2.23366e-24	-1.79547e-18	-6.30797e-14	-1.99071e-10	-9.81615e-08	-1.15531e-05	-0.000448163	-0.00733	-0.06095	-0.2988	-0.74075	-0.1315	0.07568	0.11595	0.31725	0.62193	0.83446	0.67544	0.2498	-0.28235	-0.7691	-1.08796	-1.18561	-2.85077	0.28381	1.07639	1.08662
1381.7	0	-3.53182e-22	-6.14117e-18	-1.82699e-14	-1.27884e-11	-2.7319e-09	-2.20142e-07	-7.9506e-06	-0.000148102	-0.0016	-0.01094	-0.05159	-0.17851	-0.47833	-1.038	-0.6747	-0.02114	0.35738	0.70502	0.97148	1.07886	0.96681	0.61965	0.04907	-0.45557	-0.83362	-1.03626	-1.06602	-0.96286	-2.08097	-0.01808	0.8624	0.94997
1382.31	0	-8.00876e-32	-1.49266e-25	-1.80456e-20	-2.37604e-16	-5.18468e-13	-2.63326e-10	-4.09478e-08	-2.43098e-06	-6.58051e-05	-0.000937319	-0.00789	-0.04319	-0.16606	-0.47839	-0.99429	-0.33791	0.02972	0.2845	0.55917	0.81663	0.9564	0.88385	0.50969	0.02135	-0.46761	-0.85911	-1.08956	-1.14168	-2.91963	-0.02625	0.94225	1.05448
1383.5	0	-7.4752e-81	-1.57813e-63	-7.38015e-50	-4.51152e-39	-1.46293e-30	0.12654	0.3309	0.22816	0.26621	0.07659	4.6915e-05	-3.55958e-05	-0.00151	0.30173	0.67576	0.82681	0.56808	-0.05342	-0.85034	-1.50588	-1.72412	-1.35048	-0.44642	0.45635	1.19597	1.55365	1.46258	1.00613	-1.83151	-2.50177	-0.26912	0.03676
1386.72	0	-1.97754e-18	-2.00287e-15	-7.04916e-13	-1.01168e-10	-6.77598e-09	-2.37332e-07	-4.78583e-06	-6.02764e-05	-0.00050814	-0.00304	-0.01359	-0.04735	-0.13341	-0.31372	-0.24913	0.1214	0.26476	0.26971	0.1987	0.09948	-0.000810035	-0.07798	-0.10569	-0.10662	-0.04041	0.06495	0.16861	0.23218	0.21018	-0.88982	-0.45599	-0.24168
1431.23	0	-1.07443e-56	-3.09362e-47	-2.54801e-39	-1.07214e-32	-3.74454e-27	-1.62934e-22	-1.24069e-18	-2.19664e-15	-1.14659e-12	-2.1508e-10	-1.70983e-08	-6.60788e-07	-1.39186e-05	-0.00017582	0.00428	0.53685	0.77615	0.69404	0.38083	-0.05108	-0.48916	-0.81411	-0.85917	-0.74019	-0.45029	-0.07103	0.30076	0.58057	2.07078	-0.81139	-1.72346	-1.24578
1436.46	0	-3.98295e-17	-1.02132e-13	-6.11036e-11	-1.11499e-08	-7.70853e-07	-2.4064e-05	0.01566	0.30421	0.00529	-0.08819	-0.3027	-0.74488	-1.06883	-0.59049	0.08641	0.78547	1.05628	1.06819	0.85192	0.48284	0.06337	-0.32251	-0.63566	-0.71464	-0.67712	-0.58295	-0.48225	-0.40185	-1.19531	-0.13801	0.63303	0.71131
1451.78	0	-3.55117e-37	-6.23451e-29	-1.86831e-22	-2.28749e-17	-2.2713e-13	-3.13274e-10	-9.14973e-08	-7.86327e-06	-0.000256834	-0.00389	-0.032	-0.16162	-0.35774	-0.00664	0.25779	0.30944	0.08969	-0.06261	-0.07388	0.01474	0.11339	0.1365	0.0113	-0.05983	-0.11152	-0.13514	-0.13321	-0.11435	-0.32716	0.00533	0.30918	0.36545
1452.92	0	-4.57945e-12	-1.80104e-09	-2.2059e-07	-1.05137e-05	-0.00023301	0.24319	0.72029	0.68667	0.41555	-0.58011	-1.02432	-0.58794	-0.34809	-0.11302	0.13973	0.33704	0.28007	0.14985	0.01266	-0.08201	-0.1174	-0.1171	-0.128	-0.05734	0.00533	0.04439	0.05552	0.04495	-0.04765	0.03179	0.12708	0.13482
1453.53	0	-2.56534e-15	-4.50006e-12	-1.82924e-09	-2.28766e-07	-1.10368e-05	-0.000246079	-0.00293	-0.02096	-0.09892	-0.33313	-0.52445	-0.1712	0.16951	0.32189	0.37771	0.4119	0.27342	0.15334	0.06289	-0.01354	-0.0918	-0.18577	-0.30801	-0.29887	-0.2443	-0.17024	-0.10193	-0.05328	-0.07228	0.31527	0.42638	0.28828
1454.45	0	-2.56546e-12	-6.48779e-10	-6.13853e-08	-2.5769e-06	-5.51809e-05	-0.000675959	-0.00521	-0.02728	-0.1038	-0.30282	-0.70884	-0.78311	-0.27526	0.21276	0.62076	0.91402	0.84082	0.62754	0.35876	0.09887	-0.11706	-0.29014	-0.45115	-0.49313	-0.49532	-0.47841	-0.45391	-0.42237	-1.12241	0.27726	0.76017	0.55668
1455.12	0	-2.82116e-33	-3.36853e-26	-1.42831e-20	-4.26086e-16	-1.53993e-12	-1.03814e-09	-1.83734e-07	-1.11797e-05	-0.000289262	-0.00377	0.1279	0.45852	0.58864	0.44598	0.00902	-0.46296	-0.87143	-0.93398	-0.61618	-0.06999	0.46356	0.76702	0.6784	0.41057	0.07107	-0.22799	-0.41705	-0.47834	-1.18263	0.05341	0.47016	0.54267
1457.82	0	-2.57974e-09	-2.02376e-07	-7.1978e-06	-0.000133145	-0.00143	0.06386	0.16602	0.03952	-0.18763	-0.86271	-1.06668	-0.36639	0.20762	0.71512	1.05387	1.10818	0.78033	0.3151	-0.15226	-0.51742	-0.72379	-0.77079	-0.69249	-0.46273	-0.20254	0.03123	0.20208	0.29731	0.95052	0.2405	0.09212	0.09609
1458.76	0	-4.23531e-18	-3.82474e-14	-5.37503e-11	-1.71624e-08	-1.67963e-06	0.07366	0.21165	0.19165	0.18888	-0.18166	-0.66035	-0.6541	-0.22034	-0.0365	0.12852	0.40777	0.4995	0.5443	0.50086	0.34532	0.09276	-0.22586	-0.57895	-0.71683	-0.73412	-0.65234	-0.50805	-0.33849	-0.0029	0.95782	0.84519	0.50922
1460.52	0	-3.91063e-57	-9.46996e-47	-3.26812e-38	-3.42229e-31	-2.02428e-25	-1.12731e-20	-8.99587e-17	-1.45259e-13	-6.29988e-11	-9.25367e-09	-5.56394e-07	-1.59871e-05	-0.000249191	-0.00234	0.53363	0.92918	0.90188	0.54009	-0.0637	-0.74498	-1.28737	-1.45944	-1.04795	-0.38596	0.41345	1.09545	1.46172	1.43343	0.41532	-3.70018	-1.50089	-0.29196
1470.04	0	-1.33389e-15	-3.68466e-12	-2.01997e-09	-3.0489e-07	-1.64091e-05	0.21631	0.63099	0.59764	0.287	-0.3654	-0.94429	-0.82751	-0.43889	-0.14412	0.17954	0.51111	0.54595	0.44812	0.25014	0.0122	-0.19982	-0.3555	-0.463	-0.39716	-0.28547	-0.1681	-0.07327	-0.01227	0.05648	0.28875	0.42906	0.30808
1470.53	0	-1.16835e-13	-4.24986e-11	-5.60355e-09	-3.17852e-07	-8.93156e-06	-0.000139687	-0.00134	-0.00853	-0.03861	-0.13136	-0.35227	-0.77455	-1.36954	-0.99701	-0.20272	0.71851	1.35759	1.74315	1.75539	1.37114	0.68483	-0.14621	-0.95778	-1.39122	-1.52315	-1.41292	-1.16041	-0.86277	-1.29747	0.55915	1.25622	1.00294
1471.35	0	0.79539	2.42729	0.34342	0.19505	0.46136	0.12868	-0.293	-0.33577	-0.51984	-1.7454	-1.79948	-1.19354	-0.53367	0.10851	0.57827	0.77446	0.65483	0.39893	0.12062	-0.09377	-0.2036	-0.21563	-0.16421	-0.04674	0.07388	0.16856	0.22192	0.23324	0.5137	-0.02253	-0.3505	-0.43631
1473.53	0	-8.80642e-43	-1.05711e-32	-6.272e-25	-6.19805e-19	-2.60341e-14	0.21564	0.57758	0.43657	0.1634	0.04183	-0.04697	-0.24333	-0.77946	-0.55332	-0.25001	-0.03517	0.00818	0.15123	0.32416	0.40541	0.32637	0.0882	-0.27028	-0.40813	-0.42032	-0.34129	-0.22623	-0.12257	-0.19075	0.16128	0.53172	0.44792
1474.03	0	-1.13825e-06	0.27978	0.94797	1.25484	0.50552	0.31474	0.00558	-0.04134	-0.11035	-1.48138	-1.91061	-1.29049	-0.63123	0.09151	0.72599	1.10166	1.05038	0.75429	0.32288	-0.12271	-0.47871	-0.6925	-0.75592	-0.61375	-0.402	-0.18841	-0.02014	0.08491	0.49811	0.54727	0.38222	0.16018
1474.6	0	-6.65199e-07	-1.47722e-05	-0.000193309	-0.00162	0.24269	0.8385	0.45286	0.57385	-0.05451	-0.86305	-0.68278	-0.46012	-0.27448	-0.10608	0.00739	0.07804	0.04334	0.02201	0.02679	0.04883	0.07166	0.07293	0.02678	0.03317	0.04508	0.05521	0.05708	0.04962	0.01561	0.06119	0.05146	0.01347
1475.74	0	-9.81905e-13	-3.20309e-10	-3.68316e-08	-1.79409e-06	-4.30059e-05	0.24568	0.73853	0.76359	0.32602	-0.1801	-0.72045	-0.86376	-0.49293	-0.2207	0.03181	0.30146	0.29793	0.18009	-0.00712	-0.19828	-0.32437	-0.34454	-0.25789	-0.02389	0.2335	0.43484	0.52806	0.50189	0.42867	-0.62737	-0.23311	-0.07829
1476.37	0	0.30209	0.98745	0.24779	-0.000170223	0.28465	0.17663	0.09965	0.35554	-0.11007	-0.8184	-0.99028	-0.63949	-0.39962	-0.1615	0.08071	0.30604	0.33162	0.27025	0.13685	-0.03374	-0.18946	-0.28749	-0.30515	-0.1543	0.04831	0.23288	0.34452	0.36086	0.37464	-0.39282	-0.06833	0.00766
1476.88	0	-4.18142e-09	-2.3968e-07	-6.84143e-06	-0.000109048	-0.00107	-0.00695	-0.03214	-0.11169	-0.30566	-0.6851	-1.15238	-0.93992	-0.12911	0.63297	1.26823	1.61885	1.43157	0.95625	0.34425	-0.24952	-0.70499	-0.96845	-1.04231	-0.89015	-0.65833	-0.42435	-0.23845	-0.11665	-0.05295	0.55948	0.6101	0.32598
1481.91	0	-1.07646e-18	-5.37584e-16	-1.15737e-13	-1.2022e-11	-6.63891e-10	-2.11913e-08	-4.20259e-07	-5.51177e-06	-5.0464e-05	-0.000338062	-0.00173	-0.00696	-0.02287	-0.06289	-0.14452	0.06116	0.15844	0.09809	-0.01646	-0.10333	-0.12494	-0.07429	0.04706	0.09111	0.10574	0.09008	0.05844	0.03137	0.12385	-0.04885	-0.63852	-0.48789
1484.34	0	-1.36907e-07	-3.23144e-06	-4.6014e-05	-0.000426486	-0.00274	0.32609	0.7358	0.11469	0.01839	-0.56725	-0.93192	-0.62572	-0.14925	0.25038	0.5176	0.60218	0.3992	0.12002	-0.13218	-0.2914	-0.33725	-0.29119	-0.20247	-0.06364	0.06472	0.15642	0.20157	0.20483	0.3413	-0.20311	-0.35024	-0.24696
1484.87	0	-2.02141e-25	-2.01835e-20	-2.3336e-16	-4.6771e-13	-2.25421e-10	-3.40502e-08	-1.99625e-06	-5.39772e-05	-0.000774002	-0.00659	-0.03663	-0.14323	-0.41989	-0.9721	-0.94627	-0.22463	0.24213	0.70854	1.12252	1.34142	1.25129	0.81847	0.07272	-0.58976	-1.07735	-1.32301	-1.3361	-1.1782	-2.36397	0.02411	1.09665	1.27231
1486.28	0	-2.75067e-28	-8.0417e-22	-9.05601e-17	-8.00807e-13	-9.69594e-10	-2.47847e-07	-1.87137e-05	-0.000541119	-0.00733	-0.05441	-0.25076	-0.60602	-0.34889	0.10284	0.30916	0.5129	0.43641	0.35266	0.26835	0.162	0.0217	-0.16145	-0.39984	-0.46514	-0.4613	-0.40685	-0.32612	-0.23992	-0.35077	0.37527	0.70323	0.6236
1489.91	0	-6.39665e-25	-9.35592e-21	-2.97735e-17	-2.62621e-14	-7.86689e-12	-9.48732e-10	-5.31104e-08	-1.55474e-06	-2.63013e-05	-0.000279672	-0.00201	-0.01032	-0.04002	-0.12224	-0.30234	-0.29583	0.0402	0.18723	0.19222	0.13775	0.08929	0.07449	0.10083	0.08159	0.0791	0.08518	0.09213	0.09291	-0.15416	-1.02096	-0.81772	-0.33026
1496.47	0	-1.51956e-08	-1.2324e-06	-4.20055e-05	-0.000708224	0.46252	1.69393	1.02224	0.83587	-0.42194	-1.63438	-1.63761	-1.41598	-0.98476	-0.24536	0.58699	1.21723	1.32798	1.05498	0.52193	-0.08906	-0.60549	-0.92818	-1.02502	-0.84246	-0.56479	-0.28367	-0.06121	0.07904	0.56309	0.59683	0.52714	0.32282
1499.68	0	-5.91805e-06	-0.000117927	-0.00134	-0.00959	0.47039	1.65047	0.43021	-0.32014	-0.63971	-1.95171	-1.50358	-0.75496	0.13256	0.98018	1.5079	1.48731	1.00731	0.33462	-0.3182	-0.79426	-1.02381	-1.02612	-0.86764	-0.58849	-0.31794	-0.10606	0.02979	0.09922	0.52566	0.7528	0.58148	0.31524
1504.4	0	-3.06292e-11	-5.78939e-09	-4.19066e-07	-1.37783e-05	-0.000236424	-0.00237	0.03076	0.81471	0.38813	-0.40243	-1.06264	-0.98597	-0.44151	0.02709	0.48246	0.87558	0.89261	0.69689	0.34806	-0.05925	-0.42031	-0.66356	-0.75964	-0.61763	-0.38401	-0.1401	0.05246	0.16529	0.53525	0.24989	0.30963	0.23495
1508.39	0	0	0	-6.84967e-255	-6.38501e-181	-2.6024e-128	-6.82287e-91	-2.80313e-64	-2.37908e-45	-6.90785e-32	-2.59864e-22	-1.67949e-15	-1.17229e-10	-3.26621e-07	-9.18333e-05	-0.00501	-0.08339	-0.02018	0.82179	0.37637	-0.56266	-0.97226	-0.57201	0.1497	0.64374	0.75111	0.47335	0.00212	-0.43421	-2.27818	0.37638	0.59337	0.55166
1513.74	0	-4.47912e-14	-5.26692e-12	-3.24096e-10	-1.13704e-08	-2.44908e-07	-3.45253e-06	-3.3671e-05	-0.000238376	-0.00128	-0.00537	-0.01832	-0.05202	-0.12607	-0.26622	-0.39841	0.13221	0.44487	0.54666	0.46711	0.25194	-0.03868	-0.32697	-0.51243	-0.55971	-0.43259	-0.16844	0.16094	0.47049	2.34887	-0.8053	-1.51393	-0.47735
1536.27	0	-2.36226e-24	-7.58727e-21	-8.06816e-18	-3.30265e-15	-5.92523e-13	-5.20927e-11	-2.47037e-09	-6.86329e-08	-1.19951e-06	-1.40243e-05	-0.000115685	-0.000705066	-0.0033	-0.01234	0.17487	0.68165	0.9252	0.8816	0.59283	0.14198	-0.37024	-0.83275	-1.10174	-1.17416	-1.03341	-0.7371	-0.37133	-0.01744	1.98823	2.41732	0.16778	-1.54679
1581.26	0	-2.6813e-104	-5.94044e-79	-1.08241e-59	-4.68724e-45	-6.21625e-34	-1.76133e-25	-4.66592e-19	-3.54797e-14	-1.816e-10	-1.19468e-07	-1.64729e-05	-0.000687558	-0.01145	-0.09368	-0.42684	0.21389	0.24641	-0.1664	-0.3979	-0.22038	0.27926	0.77811	0.84256	0.51314	-0.06178	-0.67525	-1.13144	-1.3187	-3.00706	0.68701	1.00051	0.98957
1584.34	0	-6.0666e-84	-1.72442e-66	-1.30488e-52	-1.41869e-41	-8.46852e-33	-8.05917e-26	-2.85415e-20	-7.38064e-16	-2.38143e-12	-1.46711e-09	-2.41689e-07	-1.38882e-05	-0.000343246	-0.00431	-0.0313	-0.14653	-0.3196	-0.14189	-0.03741	-0.10231	-0.05215	0.15257	0.44568	0.52367	0.47746	0.30653	0.06115	-0.18902	-2.30709	-1.85557	-0.24227	0.65377
1591.04	0	-1.10864e-52	-4.50558e-40	-2.07054e-30	-5.25284e-23	-2.47953e-17	-5.52532e-13	-1.18599e-09	-4.22992e-07	-3.79583e-05	-0.00117	-0.01587	-0.11261	-0.48349	-0.45712	-0.0697	0.19134	0.1842	0.32066	0.556	0.70844	0.61839	0.23055	-0.41178	-0.80994	-0.98596	-0.92701	-0.69455	-0.38559	0.44406	0.7443	0.67758	0.56684
1597.72	0	-5.88993e-45	-4.37985e-36	-6.46291e-29	-4.01511e-23	-1.92864e-18	-1.17051e-14	-1.33436e-11	-3.93299e-09	-3.87478e-07	-1.56776e-05	-0.000307327	-0.00334	-0.02232	-0.10069	-0.32902	-0.65063	-0.06231	0.19421	0.26323	0.29748	0.33369	0.35036	0.28757	0.13406	-0.01828	-0.1452	-0.23097	-0.27256	-1.24977	-1.00287	-0.24872	0.35867
1598.72	0	-6.16817e-61	-5.3209e-44	-1.12526e-31	-1.04984e-22	-3.5405e-16	-1.99457e-11	-5.71684e-08	-1.87148e-05	-0.00125	-0.0261	-0.22805	-0.18449	0.2446	0.04871	-0.22485	-0.04472	0.15924	0.43616	0.53248	0.35284	-0.01861	-0.437	-0.76619	-0.72001	-0.52057	-0.26172	-0.03023	0.12288	0.59999	0.40095	0.4348	0.14783
1600.55	0	-3.09136e-75	-5.13853e-55	-3.86748e-40	-3.40646e-29	-3.84213e-21	-3.22638e-15	-7.36474e-11	-1.18433e-07	-2.69742e-05	-0.00145	-0.02641	-0.21468	-0.72402	-0.35746	-0.05056	0.28001	0.44529	0.75824	0.96873	0.82951	0.30523	-0.45825	-1.22469	-1.43603	-1.2939	-0.90958	-0.44134	-0.02792	1.28149	0.88322	0.79691	0.52477
1607.14	0	-8.53973e-25	-6.82956e-20	-6.53375e-16	-1.11444e-12	-4.68261e-10	-6.29428e-08	-3.3414e-06	-8.30225e-05	-0.00111	-0.00887	-0.04678	-0.17494	-0.49375	-1.10687	-0.71723	-0.03025	0.37842	0.79576	1.11537	1.22798	1.05879	0.60301	-0.09603	-0.66736	-1.05887	-1.23023	-1.20295	-1.0354	-1.88202	0.37354	1.00948	0.92562
1607.83	0	-1.61775e-36	-1.2157e-28	-2.08616e-22	-1.797e-17	-1.44936e-13	-1.79216e-10	-5.01394e-08	-4.31034e-06	-0.000144753	-0.00229	-0.01989	-0.10646	-0.38669	-0.26669	0.0493	0.18089	0.00717	-0.05219	0.08714	0.35343	0.58355	0.61374	0.31247	-0.06355	-0.44416	-0.73468	-0.8809	-0.87566	-1.85493	0.35419	0.77375	0.73542
1618.76	0	-1.02222e-143	-7.44636e-112	-5.40029e-87	-1.34795e-67	-1.83773e-52	-1.183e-40	-1.93491e-31	-2.98941e-24	-1.21536e-18	-2.89186e-14	-7.51209e-11	-3.46189e-08	-4.1252e-06	-0.000170052	-0.00304	-0.02798	-0.1242	-0.01949	0.32254	0.11077	-0.28872	-0.47387	-0.24897	0.06057	0.44216	0.70554	0.73292	0.51672	-1.92808	-2.75263	-0.27637	0.57154
1621.86	0	-1.02777e-13	-6.43083e-11	-1.20677e-08	-8.47624e-07	-2.66511e-05	-0.000433552	-0.00411	-0.02491	-0.10491	-0.32718	-0.76482	-0.78061	-0.26746	0.1299	0.48015	0.79971	0.84212	0.80744	0.70735	0.52661	0.25225	-0.12016	-0.58623	-0.88634	-1.06869	-1.1217	-1.06081	-0.9183	-1.83562	0.33343	1.26499	1.32978
1622.29	0	-2.12738e-29	-3.57068e-23	-3.2682e-18	-2.9436e-14	-4.17492e-11	-1.355e-08	-1.35327e-06	-5.25567e-05	-0.000955125	-0.00941	-0.05657	-0.22826	-0.58666	-0.30817	0.04143	0.26565	0.25989	0.29145	0.37965	0.45746	0.43809	0.2633	-0.09614	-0.36669	-0.5514	-0.62798	-0.60673	-0.51741	-0.98814	0.14385	0.55632	0.58153
1625.65	0	-1.71889e-05	-0.000187949	-0.00139	-0.00738	-0.02957	-0.09321	-0.17384	0.74693	-0.05324	-0.31345	0.09236	0.31357	0.38266	0.22967	-0.09999	-0.47756	-0.72119	-0.72163	-0.49703	-0.14694	0.20528	0.45817	0.54272	0.54242	0.47401	0.37109	0.26088	0.16224	0.02274	-0.19023	-0.26707	-0.21312
1627.05	0	-2.6675e-34	-1.84909e-26	-2.39665e-20	-1.39622e-15	-7.24273e-12	-5.69676e-09	-1.02711e-06	-5.84258e-05	-0.00134	-0.01505	-0.0958	-0.38936	-0.1896	0.19534	0.14977	0.13516	0.01566	0.04927	0.18686	0.30542	0.30375	0.1361	-0.1975	-0.37474	-0.44606	-0.41096	-0.30385	-0.17206	0.00965	0.26582	0.46277	0.41056
1628.85	0	-1.22611e-20	-4.95745e-17	-5.10559e-14	-1.67596e-11	-2.11312e-09	-1.19491e-07	-3.44694e-06	-5.64683e-05	-0.000574628	-0.00392	-0.01904	-0.0697	-0.20091	-0.47375	-0.93211	-0.45349	-0.09239	0.19077	0.50783	0.80145	0.97557	0.94628	0.64887	0.20369	-0.24764	-0.60617	-0.81331	-0.86136	-2.42303	-0.90479	0.25897	0.93764
1638.46	0	-1.80139e-08	-8.58615e-07	-2.0764e-05	-0.000285281	-0.00245	-0.01414	-0.05891	-0.18657	-0.4704	-0.98092	-1.16385	-0.39825	0.37378	1.12568	1.59237	1.59343	1.07469	0.36472	-0.31566	-0.8042	-1.03104	-1.01843	-0.84042	-0.53914	-0.24065	1.21369e-05	0.1605	0.24577	0.95612	0.64256	0.25553	0.081
1643.06	0	-7.23749e-61	-2.56312e-48	-2.65251e-38	-2.60646e-30	-6.22861e-24	-7.66708e-19	-8.8485e-15	-1.54369e-11	-5.9551e-09	-6.87033e-07	-3.01026e-05	-0.000605239	-0.00649	0.17601	0.5484	0.74272	0.52297	-0.00114	-0.63123	-1.1081	-1.22384	-0.88574	-0.15399	0.56928	1.16233	1.43152	1.29358	0.79755	-3.24295	-3.49391	0.18446	0.84605
1646.6	0	-4.87207e-15	-1.57756e-12	-2.09227e-10	-1.30138e-08	-4.25468e-07	-8.04958e-06	-9.56e-05	-0.000763675	-0.00435	-0.0186	-0.06221	-0.16897	-0.38443	-0.21687	0.13537	0.34702	0.26506	0.07985	-0.10871	-0.22721	-0.23034	-0.09585	0.16696	0.43671	0.65473	0.7229	0.58809	0.26683	-2.80142	-2.65422	-0.07472	0.54876
1649	0	-1.21044e-26	-4.57096e-22	-3.06623e-18	-4.84906e-15	-2.28953e-12	-3.92955e-10	-2.88762e-08	-1.041e-06	-2.06208e-05	-0.000246729	-0.00193	-0.01056	-0.04274	-0.13421	-0.00939	0.20988	0.15448	-0.03497	-0.22402	-0.31203	-0.26428	-0.09251	0.16178	0.3289	0.45475	0.51011	0.47907	0.36122	-0.91407	-2.50604	-0.86848	0.34546
1650.18	0	-1.07954e-34	-2.61808e-27	-1.93411e-21	-8.9134e-17	-4.52905e-13	-3.98759e-10	-8.70227e-08	-6.24397e-06	-0.000183998	-0.00265	-0.02156	-0.11024	-0.38849	-0.09969	0.21143	0.27585	0.07183	-0.07422	-0.06384	0.06946	0.21621	0.26453	0.12425	-0.01407	-0.13337	-0.20777	-0.23545	-0.23033	-0.87867	-0.54108	0.08458	0.38817
1652.81	0	-2.36951e-41	-8.69649e-32	-2.27936e-24	-1.29316e-18	-3.75299e-14	-1.0854e-10	-5.242e-08	-6.29555e-06	-0.000255262	-0.00442	-0.03915	-0.20469	-0.70607	-0.51527	-0.14406	0.13434	0.28335	0.57192	0.88713	1.02585	0.84317	0.31115	-0.50092	-1.0551	-1.35366	-1.36626	-1.14747	-0.79905	-0.30142	0.89843	0.92724	0.80201
1659.07	0	-2.35694e-37	-6.37093e-30	-6.40012e-24	-4.50197e-19	-3.69815e-15	-5.36046e-12	-1.91202e-09	-2.19232e-07	-1.00105e-05	-0.000216135	-0.00253	-0.01804	-0.08548	-0.29052	-0.74418	-0.59589	-0.14565	0.09466	0.33472	0.65441	0.9281	1.00357	0.72469	0.22658	-0.32337	-0.78718	-1.07045	-1.14524	-2.96893	-0.37297	0.69641	1.05012
1659.75	0	-4.93747e-111	-9.88795e-85	-1.37091e-64	-3.6457e-49	-2.36675e-37	-2.63103e-28	-2.22628e-21	-4.49425e-16	-5.19134e-12	-6.7017e-09	-1.61174e-06	-0.000106447	-0.00259	-0.029	-0.17745	-0.5587	-0.40843	0.0314	0.11198	0.23759	0.50705	0.76319	0.70711	0.35369	-0.14764	-0.6512	-1.01685	-1.16482	-2.92657	0.16019	0.83486	1.04981
1660.05	0	-6.34281e-09	-2.07048e-07	-3.98057e-06	-4.8649e-05	-0.000403426	-0.0024	-0.01075	-0.03772	-0.10752	-0.25653	-0.52576	-0.94636	-1.423	-0.95169	-0.05615	0.89784	1.47023	1.75339	1.7158	1.37595	0.8064	0.1072	-0.61824	-1.09046	-1.33697	-1.37348	-1.25512	-1.05091	-2.22235	-0.17216	1.03758	1.26339
1666.32	0	-2.5516e-12	-3.53447e-10	-2.23873e-08	-7.31558e-07	-1.36479e-05	-0.000158309	-0.00123	-0.00676	-0.02784	-0.0897	-0.23468	-0.45154	-0.20337	0.29754	0.62777	0.7729	0.53513	0.12085	-0.33376	-0.69544	-0.86203	-0.77738	-0.42629	0.08181	0.62097	1.03932	1.21978	1.11778	0.06307	-2.76249	-0.77892	-0.09608
1670.41	0	-1.56444e-36	-2.59619e-30	-4.0829e-25	-8.96622e-21	-3.80078e-17	-4.075e-14	-1.38423e-11	-1.79692e-09	-1.04168e-07	-3.06941e-06	-5.12047e-05	-0.000529223	-0.00365	-0.01798	0.00689	0.37576	0.43918	0.22509	-0.16309	-0.5699	-0.82737	-0.78513	-0.33173	0.2161	0.77414	1.15246	1.22846	0.98601	-1.28778	-3.39225	-0.90004	0.02596
1670.98	0	-1.34227e-36	-1.08477e-28	-1.95791e-22	-1.74554e-17	-1.44033e-13	-1.80713e-10	-5.10037e-08	-4.40557e-06	-0.000148252	-0.00235	-0.02036	-0.10874	-0.39411	-0.3693	-0.02302	0.1941	0.09727	0.08854	0.22282	0.42181	0.5455	0.47187	0.11912	-0.22579	-0.51706	-0.69315	-0.73619	-0.6654	-1.20447	0.27865	0.53345	0.55255
1671.61	0	-5.28809e-25	-4.68003e-20	-4.85102e-16	-8.81578e-13	-3.89469e-10	-5.44717e-08	-2.98415e-06	-7.60221e-05	-0.00103	-0.00842	-0.04495	-0.16974	-0.48283	-0.72171	-0.37092	0.04375	0.19614	0.39256	0.63286	0.83081	0.87398	0.68156	0.20906	-0.26673	-0.67404	-0.94517	-1.0584	-1.02978	-2.50891	-0.12034	0.79917	0.99176
1674.08	0	-1.28511e-15	-1.80724e-12	-6.5711e-10	-7.93057e-08	-3.8875e-06	-9.11108e-05	-0.00117	-0.00906	-0.04679	-0.17263	-0.32727	-0.03738	0.4446	0.66176	0.61437	0.32306	-0.24247	-0.74697	-0.99857	-0.90329	-0.49583	0.07884	0.60053	0.92187	0.98396	0.81434	0.5052	0.16896	-1.06741	-0.64001	-0.20475	0.06165
1674.93	0	-1.02171e-30	-1.0312e-23	-3.04723e-18	-5.71116e-14	-1.24135e-10	0.55842	1.22124	0.17645	0.27918	0.0504	-0.16343	-0.57575	-1.14869	-1.00187	-0.70534	-0.22973	0.23275	0.74501	1.07288	1.045	0.64917	-0.00474	-0.75477	-1.12077	-1.19621	-1.02733	-0.71624	-0.37322	0.43643	0.86024	0.80811	0.61799
1675.51	0	-2.03976e-16	-1.25032e-12	-1.18369e-09	-2.57644e-07	-1.75847e-05	0.17686	0.48807	0.38018	0.12768	-0.48008	-0.62531	-0.31348	-0.30036	-0.24979	-0.01139	0.37163	0.55131	0.58448	0.43523	0.14568	-0.18847	-0.48268	-0.68477	-0.62675	-0.46415	-0.26281	-0.08008	0.05034	0.46546	0.3944	0.38556	0.28931
1677.84	0	-0.00705	3.71376	2.04635	1.89119	0.57111	-0.73103	-2.05922	-0.35211	-1.62252	-2.52607	-1.95059	-0.93661	0.02989	0.78103	1.20487	1.24089	1.02449	0.70759	0.41109	0.21132	0.13302	0.15773	0.24532	0.35948	0.44426	0.47402	0.4427	0.36126	0.28673	-0.68805	-0.76252	-0.58947
1688.48	0	-1.63349e-23	-3.20651e-19	-1.13594e-15	-9.76475e-13	-2.59988e-10	-2.62094e-08	-1.17989e-06	-2.71674e-05	-0.000357844	-0.00296	-0.01659	-0.06725	-0.14281	0.13893	0.42342	0.5054	0.2666	-0.08585	-0.40545	-0.58519	-0.58516	-0.41997	-0.14787	0.12549	0.3918	0.60525	0.73015	0.74212	0.74448	-2.26881	-1.26363	-0.16858
1689.28	0	-2.13187e-21	-1.5611e-16	-1.03326e-12	-1.03473e-09	0.28832	1.26544	1.05081	0.47286	0.31377	-0.10832	-0.63991	-0.78974	-0.60879	-0.72898	-0.77033	-0.49013	-0.22981	0.08075	0.32717	0.4394	0.41356	0.27442	0.04324	-0.04584	-0.08415	-0.08515	-0.06928	-0.05414	-0.32191	-0.24198	0.14368	0.25891
1692.78	0	-1.22042e-18	-1.15213e-14	-1.7491e-11	-6.14236e-09	-6.66393e-07	-2.81038e-05	-0.000552939	-0.00587	-0.03783	-0.16257	-0.1873	0.0448	-0.01258	-0.16397	-0.27624	-0.12336	0.0647	0.37951	0.68307	0.81986	0.69724	0.30427	-0.3085	-0.74254	-1.00572	-1.06912	-0.9637	-0.75435	-0.97402	0.44089	0.82774	0.80098
1693.48	0	-2.31295e-28	-9.25351e-23	-3.23183e-18	-1.56214e-14	-1.51792e-11	-4.00988e-09	-3.67348e-07	-1.41964e-05	-0.000271016	-0.0029	-0.01939	-0.08782	-0.2895	-0.7358	-0.37426	0.11362	0.24994	0.32975	0.39763	0.45733	0.4764	0.41348	0.21159	-0.00261	-0.20612	-0.37863	-0.50983	-0.59702	-2.55494	-1.08065	0.45316	0.93507
1693.93	0	-1.92786e-27	-2.78514e-22	-4.75818e-18	-1.41052e-14	-9.93286e-12	-2.14815e-09	-1.75927e-07	-6.47157e-06	-0.000122909	-0.00135	-0.00944	-0.04533	-0.15957	-0.4345	-0.9498	-0.93399	-0.31531	0.17342	0.66837	1.14168	1.42207	1.35857	0.84105	0.11385	-0.61105	-1.16111	-1.43759	-1.43289	-3.03932	-0.22119	0.59495	1.16955
1724.28	0	-1.35524e-100	-2.13461e-79	-1.30545e-62	-2.56552e-49	-8.63812e-39	-1.87538e-30	-7.49922e-24	-1.26815e-18	-1.75143e-14	-3.32598e-11	-1.31073e-08	-1.48238e-06	-6.20535e-05	-0.00117	-0.01176	-0.07065	-0.28181	-0.44758	-0.146	8.59138e-05	-0.08547	-0.0681	0.35581	0.66292	0.83617	0.76679	0.44899	-0.02861	-4.03246	-2.68014	0.24642	1.0465

## Sheet: cumulative probability
cumulative probability of fitted GSD
ϕ	-3	-2.99	-2.98	-2.97	-2.96	-2.95	-2.94	-2.93	-2.92	-2.91	-2.9	-2.89	-2.88	-2.87	-2.86	-2.85	-2.84	-2.83	-2.82	-2.81	-2.8	-2.79	-2.78	-2.77	-2.76	-2.75	-2.74	-2.73	-2.72	-2.71	-2.7	-2.69	-2.68	-2.67	-2.66	-2.65	-2.64	-2.63	-2.62	-2.61	-2.6	-2.59	-2.58	-2.57	-2.56	-2.55	-2.54	-2.53	-2.52
1140.93	2.84693e-07	3.17453e-07	3.5377e-07	3.94005e-07	4.38554e-07	4.87851e-07	5.4237e-07	6.02627e-07	6.69189e-07	7.42672e-07	8.23749e-07	9.13153e-07	1.01168e-06	1.12021e-06	1.23968e-06	1.37112e-06	1.51565e-06	1.67449e-06	1.84895e-06	2.04047e-06	2.2506e-06	2.48102e-06	2.73356e-06	3.01019e-06	3.31305e-06	3.64444e-06	4.00686e-06	4.40301e-06	4.83581e-06	5.30839e-06	5.82415e-06	6.38674e-06	7.00011e-06	7.66848e-06	8.39643e-06	9.18887e-06	1.00511e-05	1.09887e-05	1.20079e-05	1.31152e-05	1.43176e-05	1.56227e-05	1.70385e-05	1.85736e-05	2.02374e-05	2.20398e-05	2.39914e-05	2.61035e-05	2.83883e-05
1142.24	0.0464	0.04806	0.04978	0.05154	0.05336	0.05523	0.05716	0.05915	0.0612	0.06331	0.06548	0.06772	0.07002	0.07239	0.07483	0.07733	0.07991	0.08257	0.0853	0.0881	0.09099	0.09395	0.097	0.10013	0.10335	0.10666	0.11005	0.11354	0.11712	0.1208	0.12458	0.12845	0.13243	0.13651	0.1407	0.14499	0.1494	0.15392	0.15855	0.1633	0.16817	0.17317	0.17829	0.18353	0.1889	0.19441	0.20005	0.20582	0.21174
1143.83	0.00106	0.00112	0.00118	0.00124	0.0013	0.00136	0.00143	0.00151	0.00158	0.00166	0.00174	0.00183	0.00192	0.00201	0.00211	0.00221	0.00232	0.00243	0.00255	0.00267	0.00279	0.00292	0.00306	0.00321	0.00335	0.00351	0.00367	0.00384	0.00402	0.0042	0.00439	0.00459	0.00479	0.00501	0.00523	0.00546	0.0057	0.00595	0.00621	0.00648	0.00676	0.00706	0.00736	0.00767	0.008	0.00834	0.00869	0.00905	0.00943
1145.41	0.000570977	0.000604181	0.000639147	0.000675958	0.000714702	0.00075547	0.000798355	0.000843457	0.000890878	0.000940724	0.000993106	0.00105	0.00111	0.00117	0.00123	0.0013	0.00137	0.00144	0.00152	0.0016	0.00168	0.00177	0.00187	0.00196	0.00207	0.00217	0.00229	0.0024	0.00252	0.00265	0.00279	0.00293	0.00307	0.00323	0.00339	0.00355	0.00373	0.00391	0.0041	0.0043	0.00451	0.00472	0.00495	0.00519	0.00543	0.00569	0.00595	0.00623	0.00652
1155.52	2.26407e-07	2.52235e-07	2.80844e-07	3.12515e-07	3.47557e-07	3.86306e-07	4.29127e-07	4.76424e-07	5.28634e-07	5.86234e-07	6.49746e-07	7.19737e-07	7.96824e-07	8.81681e-07	9.75039e-07	1.07769e-06	1.19051e-06	1.31442e-06	1.45046e-06	1.59971e-06	1.76339e-06	1.94279e-06	2.13931e-06	2.35448e-06	2.58995e-06	2.84749e-06	3.12903e-06	3.43665e-06	3.77259e-06	4.13927e-06	4.53931e-06	4.97552e-06	5.45093e-06	5.96881e-06	6.53268e-06	7.14631e-06	7.81377e-06	8.53943e-06	9.32799e-06	1.01845e-05	1.11143e-05	1.21233e-05	1.32177e-05	1.4404e-05	1.56896e-05	1.70819e-05	1.85892e-05	2.02203e-05	2.19844e-05
1160.2	7.65974e-06	8.39789e-06	9.20242e-06	1.00789e-05	1.10331e-05	1.20716e-05	1.32012e-05	1.44291e-05	1.57635e-05	1.72127e-05	1.87859e-05	2.04927e-05	2.23438e-05	2.43502e-05	2.65239e-05	2.88779e-05	3.14257e-05	3.41821e-05	3.71628e-05	4.03843e-05	4.38647e-05	4.76229e-05	5.16792e-05	5.60553e-05	6.07742e-05	6.58605e-05	7.13402e-05	7.72412e-05	8.3593e-05	9.0427e-05	9.77765e-05	0.000105677	0.000114166	0.000123283	0.000133072	0.000143575	0.000154842	0.000166922	0.000179868	0.000193738	0.00020859	0.000224487	0.000241496	0.000259687	0.000279135	0.000299918	0.000322118	0.000345823	0.000371124
1172.02	5.64273e-19	7.53457e-19	1.00427e-18	1.33618e-18	1.77465e-18	2.35286e-18	3.114e-18	4.11422e-18	5.42632e-18	7.14461e-18	9.39097e-18	1.23227e-17	1.61425e-17	2.11109e-17	2.75626e-17	3.59266e-17	4.67518e-17	6.07395e-17	7.87842e-17	1.02025e-16	1.3191e-16	1.70277e-16	2.19456e-16	2.82395e-16	3.62815e-16	4.65415e-16	5.96106e-16	7.62325e-16	9.73408e-16	1.24106e-15	1.57991e-15	2.00828e-15	2.54901e-15	3.23053e-15	4.08827e-15	5.1662e-15	6.51887e-15	8.21385e-15	1.03347e-14	1.29847e-14	1.62911e-14	2.04108e-14	2.55364e-14	3.19049e-14	3.98066e-14	4.95971e-14	6.17115e-14	7.66809e-14	9.51531e-14
1174.75	0.02063	0.02147	0.02235	0.02325	0.02418	0.02515	0.02615	0.02718	0.02825	0.02936	0.0305	0.03169	0.03291	0.03418	0.03548	0.03684	0.03823	0.03967	0.04116	0.0427	0.04429	0.04593	0.04762	0.04936	0.05116	0.05302	0.05494	0.05691	0.05895	0.06105	0.06321	0.06544	0.06773	0.0701	0.07254	0.07505	0.07763	0.08029	0.08303	0.08584	0.08874	0.09173	0.0948	0.09795	0.1012	0.10453	0.10796	0.11149	0.11511
1177.42	5.13677e-175	1.58363e-173	4.74284e-172	1.38024e-170	3.90398e-169	1.07349e-167	2.87035e-166	7.46478e-165	1.88863e-163	4.64971e-162	1.11418e-160	2.59915e-159	5.9041e-158	1.30623e-156	2.81533e-155	5.91256e-154	1.21019e-152	2.41467e-151	4.69766e-150	8.91288e-149	1.64953e-147	2.9785e-146	5.24832e-145	9.02652e-144	1.5156e-142	2.48486e-141	3.97887e-140	6.22364e-139	9.51135e-138	1.42049e-136	2.07356e-135	2.95911e-134	4.1291e-133	5.63483e-132	7.52177e-131	9.82322e-130	1.25534e-128	1.57009e-127	1.9223e-126	2.30424e-125	2.70473e-124	3.10948e-123	3.50181e-122	3.8638e-121	4.17764e-120	4.42705e-119	4.59874e-118	4.68357e-117	4.67738e-116
1181.9	8.28681e-10	9.67171e-10	1.12775e-09	1.31376e-09	1.52905e-09	1.77797e-09	2.06554e-09	2.39743e-09	2.78015e-09	3.22107e-09	3.72859e-09	4.31225e-09	4.98289e-09	5.75279e-09	6.63586e-09	7.64788e-09	8.80666e-09	1.01324e-08	1.16477e-08	1.33784e-08	1.53534e-08	1.76052e-08	2.01705e-08	2.30907e-08	2.6412e-08	3.01864e-08	3.44723e-08	3.9335e-08	4.48479e-08	5.10928e-08	5.81613e-08	6.61558e-08	7.51906e-08	8.53929e-08	9.69048e-08	1.09884e-07	1.24508e-07	1.40971e-07	1.5949e-07	1.80308e-07	2.03691e-07	2.29937e-07	2.59375e-07	2.92367e-07	3.29318e-07	3.70671e-07	4.16918e-07	4.68602e-07	5.2632e-07
1186.4	8.44786e-15	1.06996e-14	1.35312e-14	1.70864e-14	2.15437e-14	2.71235e-14	3.40983e-14	4.28041e-14	5.36547e-14	6.71589e-14	8.39415e-14	1.04769e-13	1.30579e-13	1.62518e-13	2.01988e-13	2.50694e-13	3.10718e-13	3.84584e-13	4.75364e-13	5.86777e-13	7.2333e-13	8.9047e-13	1.09478e-12	1.34419e-12	1.64825e-12	2.01847e-12	2.46866e-12	3.01536e-12	3.67844e-12	4.48165e-12	5.45335e-12	6.62742e-12	8.04425e-12	9.7519e-12	1.18075e-11	1.4279e-11	1.72469e-11	2.08065e-11	2.50708e-11	3.01731e-11	3.62709e-11	4.35498e-11	5.22284e-11	6.25638e-11	7.48581e-11	8.94659e-11	1.06803e-10	1.27355e-10	1.51691e-10
1189.2	2.60614e-06	2.86845e-06	3.1555e-06	3.46945e-06	3.81266e-06	4.18765e-06	4.59715e-06	5.04411e-06	5.53171e-06	6.06337e-06	6.64277e-06	7.2739e-06	7.96102e-06	8.70874e-06	9.52198e-06	1.04061e-05	1.13667e-05	1.241e-05	1.35425e-05	1.47712e-05	1.61038e-05	1.75483e-05	1.91133e-05	2.08082e-05	2.26427e-05	2.46276e-05	2.67741e-05	2.90943e-05	3.16011e-05	3.43084e-05	3.72309e-05	4.03841e-05	4.37848e-05	4.74508e-05	5.14011e-05	5.56558e-05	6.02363e-05	6.51655e-05	7.04676e-05	7.61685e-05	8.22953e-05	8.88772e-05	9.5945e-05	0.000103531	0.000111671	0.0001204	0.000129758	0.000139786	0.000150527
1191.95	1.59728e-55	4.03508e-55	1.01268e-54	2.52498e-54	6.25508e-54	1.53963e-53	3.76554e-53	9.15139e-53	2.21011e-52	5.30427e-52	1.26516e-51	2.99908e-51	7.06602e-51	1.65472e-50	3.85173e-50	8.91224e-50	2.04992e-49	4.68729e-49	1.06552e-48	2.40811e-48	5.41103e-48	1.20891e-47	2.68554e-47	5.93217e-47	1.30304e-46	2.84629e-46	6.18295e-46	1.33575e-45	2.87002e-45	6.13325e-45	1.30364e-44	2.75618e-44	5.7963e-44	1.21257e-43	2.52343e-43	5.22421e-43	1.076e-42	2.20484e-42	4.49506e-42	9.11804e-42	1.84031e-41	3.6959e-41	7.38588e-41	1.46877e-40	2.90663e-40	5.72435e-40	1.12196e-39	2.18854e-39	4.24891e-39
1194.94	9.86639e-09	1.12413e-08	1.27984e-08	1.45605e-08	1.6553e-08	1.88046e-08	2.1347e-08	2.42157e-08	2.74504e-08	3.10951e-08	3.51988e-08	3.98161e-08	4.50077e-08	5.0841e-08	5.73906e-08	6.47396e-08	7.29798e-08	8.22131e-08	9.25521e-08	1.04121e-07	1.17059e-07	1.31516e-07	1.47662e-07	1.65682e-07	1.85779e-07	2.08179e-07	2.33129e-07	2.60903e-07	2.91799e-07	3.26147e-07	3.64309e-07	4.06681e-07	4.53699e-07	5.05839e-07	5.63624e-07	6.27625e-07	6.98468e-07	7.76837e-07	8.63479e-07	9.5921e-07	1.06492e-06	1.18158e-06	1.31025e-06	1.45208e-06	1.60832e-06	1.78035e-06	1.96964e-06	2.17782e-06	2.40663e-06
1199.34	3.63116e-07	4.01537e-07	4.43793e-07	4.90241e-07	5.41272e-07	5.97309e-07	6.58811e-07	7.26278e-07	8.00249e-07	8.81312e-07	9.70102e-07	1.06731e-06	1.17367e-06	1.29e-06	1.41717e-06	1.55612e-06	1.70786e-06	1.87349e-06	2.05421e-06	2.25128e-06	2.4661e-06	2.70013e-06	2.95499e-06	3.2324e-06	3.5342e-06	3.8624e-06	4.21914e-06	4.60672e-06	5.02761e-06	5.48448e-06	5.98018e-06	6.51775e-06	7.10049e-06	7.7319e-06	8.41574e-06	9.15605e-06	9.95714e-06	1.08236e-05	1.17604e-05	1.27728e-05	1.38664e-05	1.50473e-05	1.63218e-05	1.76968e-05	1.91796e-05	2.0778e-05	2.25003e-05	2.43554e-05	2.63525e-05
1200.62	5.82958e-12	7.05328e-12	8.52369e-12	1.02885e-11	1.2404e-11	1.49371e-11	1.79665e-11	2.15855e-11	2.59036e-11	3.10502e-11	3.71772e-11	4.4463e-11	5.31172e-11	6.33854e-11	7.5555e-11	8.99621e-11	1.07e-10	1.27126e-10	1.50875e-10	1.7887e-10	2.11833e-10	2.50606e-10	2.96164e-10	3.49638e-10	4.1234e-10	4.85784e-10	5.71725e-10	6.72183e-10	7.89495e-10	9.26347e-10	1.08584e-09	1.27152e-09	1.48749e-09	1.73843e-09	2.02973e-09	2.36755e-09	2.75893e-09	3.21194e-09	3.73578e-09	4.34095e-09	5.03943e-09	5.84483e-09	6.77267e-09	7.84057e-09	9.06856e-09	1.04793e-08	1.20986e-08	1.39556e-08	1.60832e-08
1204.26	0.000141634	0.000151662	0.000162344	0.000173718	0.000185824	0.000198707	0.00021241	0.000226982	0.000242471	0.000258931	0.000276415	0.000294983	0.000314693	0.000335611	0.000357802	0.000381336	0.000406286	0.00043273	0.000460747	0.000490421	0.000521842	0.0005551	0.000590293	0.000627521	0.00066689	0.000708509	0.000752495	0.000798967	0.00084805	0.000899877	0.000954582	0.00101	0.00107	0.00114	0.00121	0.00128	0.00135	0.00143	0.00151	0.0016	0.00169	0.00179	0.00189	0.002	0.00211	0.00223	0.00236	0.00249	0.00263
1205.53	3.38034e-12	4.03065e-12	4.80128e-12	5.71357e-12	6.7925e-12	8.06725e-12	9.57189e-12	1.13462e-11	1.34363e-11	1.58963e-11	1.87887e-11	2.21864e-11	2.61738e-11	3.08489e-11	3.63252e-11	4.27339e-11	5.02271e-11	5.898e-11	6.91953e-11	8.11062e-11	9.49818e-11	1.11132e-10	1.29912e-10	1.51731e-10	1.77059e-10	2.06434e-10	2.40473e-10	2.79882e-10	3.25469e-10	3.78158e-10	4.39003e-10	5.09206e-10	5.90139e-10	6.83363e-10	7.90656e-10	9.14038e-10	1.0558e-09	1.21856e-09	1.40527e-09	1.61927e-09	1.86436e-09	2.14483e-09	2.46554e-09	2.83195e-09	3.25027e-09	3.72747e-09	4.2714e-09	4.89093e-09	5.59602e-09
1210.12	3.30772e-05	3.56976e-05	3.85105e-05	4.15291e-05	4.47669e-05	4.82387e-05	5.196e-05	5.5947e-05	6.02172e-05	6.4789e-05	6.96818e-05	7.49163e-05	8.05142e-05	8.64985e-05	9.28935e-05	9.97251e-05	0.00010702	0.000114808	0.000123117	0.000131981	0.000141434	0.000151509	0.000162245	0.000173681	0.000185859	0.000198821	0.000212615	0.000227287	0.000242889	0.000259474	0.000277098	0.00029582	0.000315701	0.000336807	0.000359204	0.000382965	0.000408164	0.00043488	0.000463194	0.000493193	0.000524966	0.000558608	0.000594217	0.000631897	0.000671755	0.000713904	0.000758461	0.000805551	0.000855301
1214.66	4.98327e-08	5.6212e-08	6.3365e-08	7.13801e-08	8.03553e-08	9.03987e-08	1.0163e-07	1.14182e-07	1.28199e-07	1.43844e-07	1.61294e-07	1.80744e-07	2.0241e-07	2.26529e-07	2.53361e-07	2.83193e-07	3.1634e-07	3.53147e-07	3.93992e-07	4.3929e-07	4.89498e-07	5.45111e-07	6.06676e-07	6.74788e-07	7.50098e-07	8.33316e-07	9.2522e-07	1.02666e-06	1.13855e-06	1.26189e-06	1.3978e-06	1.54745e-06	1.71214e-06	1.89329e-06	2.09241e-06	2.31118e-06	2.5514e-06	2.81501e-06	3.10415e-06	3.4211e-06	3.76835e-06	4.14859e-06	4.56474e-06	5.01992e-06	5.51755e-06	6.06129e-06	6.65509e-06	7.30322e-06	8.01029e-06
1292.77	0.00292	0.00304	0.00317	0.0033	0.00343	0.00357	0.00372	0.00387	0.00403	0.00419	0.00436	0.00453	0.00471	0.0049	0.00509	0.00529	0.0055	0.00571	0.00594	0.00617	0.0064	0.00665	0.0069	0.00717	0.00744	0.00772	0.00801	0.00831	0.00862	0.00894	0.00927	0.00962	0.00997	0.01033	0.01071	0.0111	0.0115	0.01192	0.01234	0.01279	0.01324	0.01371	0.0142	0.01469	0.01521	0.01574	0.01629	0.01685	0.01743
1299.64	1.66756e-07	1.83075e-07	2.00904e-07	2.20375e-07	2.4163e-07	2.64823e-07	2.90118e-07	3.17696e-07	3.4775e-07	3.80487e-07	4.16134e-07	4.54932e-07	4.97142e-07	5.43047e-07	5.92948e-07	6.47171e-07	7.06068e-07	7.70015e-07	8.39417e-07	9.1471e-07	9.96361e-07	1.08487e-06	1.18078e-06	1.28467e-06	1.39715e-06	1.51889e-06	1.6506e-06	1.79304e-06	1.94703e-06	2.11345e-06	2.29321e-06	2.48733e-06	2.69687e-06	2.92297e-06	3.16685e-06	3.4298e-06	3.71322e-06	4.01858e-06	4.34748e-06	4.70157e-06	5.08268e-06	5.49269e-06	5.93365e-06	6.40773e-06	6.91723e-06	7.46461e-06	8.05246e-06	8.68357e-06	9.36088e-06
1301	6.04345e-63	1.73904e-62	4.96653e-62	1.40779e-61	3.96087e-61	1.10619e-60	3.06679e-60	8.44055e-60	2.30629e-59	6.2566e-59	1.68525e-58	4.50727e-58	1.19704e-57	3.15699e-57	8.2685e-57	2.15076e-56	5.55633e-56	1.42573e-55	3.63383e-55	9.19994e-55	2.31378e-54	5.78092e-54	1.43492e-53	3.53866e-53	8.67055e-53	2.11092e-52	5.10665e-52	1.2276e-51	2.93262e-51	6.96227e-51	1.64271e-50	3.8522e-50	8.97861e-50	2.0801e-49	4.79015e-49	1.09654e-48	2.49535e-48	5.64526e-48	1.2697e-47	2.83926e-47	6.31262e-47	1.39551e-46	3.06757e-46	6.70519e-46	1.45747e-45	3.1505e-45	6.77274e-45	1.44802e-44	3.07911e-44
1302.34	2.79148e-195	1.11257e-193	4.3032e-192	1.61558e-190	5.88901e-189	2.08468e-187	7.16845e-186	2.39497e-184	7.77617e-183	2.45428e-181	7.5314e-180	2.2476e-178	6.52459e-177	1.84279e-175	5.06505e-174	1.35511e-172	3.52972e-171	8.9532e-170	2.21199e-168	5.32409e-167	1.2487e-165	2.85441e-164	6.36071e-163	1.38204e-161	2.92851e-160	6.05306e-159	1.22065e-157	2.40208e-156	4.61366e-155	8.65073e-154	1.58378e-152	2.83175e-151	4.94557e-150	8.43848e-149	1.40695e-147	2.29268e-146	3.65207e-145	5.68782e-144	8.66248e-143	1.29035e-141	1.88028e-140	2.68079e-139	3.74029e-138	5.10773e-137	6.82818e-136	8.93745e-135	1.14558e-133	1.4382e-132	1.76875e-131
1303.37	8.12663e-11	9.55393e-11	1.12214e-10	1.31675e-10	1.54368e-10	1.80804e-10	2.11574e-10	2.47353e-10	2.88921e-10	3.37171e-10	3.93124e-10	4.57954e-10	5.33003e-10	6.19803e-10	7.20107e-10	8.35914e-10	9.69504e-10	1.12348e-09	1.30078e-09	1.5048e-09	1.73933e-09	2.00872e-09	2.3179e-09	2.67245e-09	3.07867e-09	3.54373e-09	4.07571e-09	4.68373e-09	5.37811e-09	6.17048e-09	7.07394e-09	8.10324e-09	9.27498e-09	1.06078e-08	1.21227e-08	1.38433e-08	1.57958e-08	1.80099e-08	2.05186e-08	2.33592e-08	2.65729e-08	3.02062e-08	3.43106e-08	3.8944e-08	4.41704e-08	5.00617e-08	5.66974e-08	6.41662e-08	7.25667e-08
1315.05	5.90888e-06	6.49847e-06	7.14301e-06	7.84723e-06	8.61624e-06	9.45557e-06	1.03711e-05	1.13694e-05	1.24571e-05	1.36418e-05	1.49315e-05	1.63346e-05	1.78604e-05	1.95187e-05	2.13202e-05	2.32762e-05	2.5399e-05	2.77015e-05	3.01978e-05	3.29028e-05	3.58325e-05	3.90041e-05	4.24358e-05	4.61472e-05	5.01592e-05	5.4494e-05	5.91754e-05	6.42287e-05	6.96809e-05	7.55607e-05	8.18987e-05	8.87276e-05	9.60818e-05	0.000103998	0.000112516	0.000121677	0.000131525	0.000142106	0.000153471	0.000165672	0.000178765	0.000192809	0.000207866	0.000224003	0.000241289	0.000259799	0.000279611	0.000300807	0.000323475
1317.92	3.61603e-19	4.87266e-19	6.55359e-19	8.79786e-19	1.17887e-18	1.57669e-18	2.10488e-18	2.80488e-18	3.73088e-18	4.95361e-18	6.56528e-18	8.68579e-18	1.14708e-17	1.51222e-17	1.9901e-17	2.61445e-17	3.42873e-17	4.4889e-17	5.86685e-17	7.65481e-17	9.97082e-17	1.29658e-16	1.68324e-16	2.1816e-16	2.82286e-16	3.64666e-16	4.70322e-16	6.05614e-16	7.78576e-16	9.99342e-16	1.28068e-15	1.63864e-15	2.09339e-15	2.67018e-15	3.40066e-15	4.32433e-15	5.49052e-15	6.96068e-15	8.81123e-15	1.11371e-14	1.40561e-14	1.77139e-14	2.2291e-14	2.80099e-14	3.5145e-14	4.40345e-14	5.50936e-14	6.88324e-14	8.5876e-14
1319.17	0.00134	0.00141	0.00148	0.00157	0.00165	0.00174	0.00183	0.00193	0.00203	0.00213	0.00225	0.00236	0.00248	0.00261	0.00275	0.00289	0.00303	0.00319	0.00335	0.00351	0.00369	0.00387	0.00406	0.00426	0.00447	0.00468	0.00491	0.00515	0.00539	0.00565	0.00592	0.00619	0.00649	0.00679	0.0071	0.00743	0.00777	0.00813	0.0085	0.00889	0.00929	0.0097	0.01014	0.01059	0.01106	0.01154	0.01205	0.01257	0.01312
1321.24	4.7129e-05	5.03359e-05	5.3745e-05	5.7368e-05	6.12172e-05	6.53055e-05	6.96465e-05	7.42544e-05	7.91443e-05	8.43319e-05	8.98337e-05	9.56672e-05	0.00010185	0.000108403	0.000115344	0.000122695	0.000130479	0.000138717	0.000147435	0.000156658	0.000166412	0.000176725	0.000187627	0.000199146	0.000211317	0.000224171	0.000237743	0.00025207	0.00026719	0.000283142	0.000299968	0.000317711	0.000336416	0.00035613	0.000376903	0.000398785	0.00042183	0.000446093	0.000471633	0.000498509	0.000526785	0.000556527	0.000587801	0.00062068	0.000655236	0.000691547	0.000729692	0.000769755	0.000811821
1329.31	4.41478e-11	5.29472e-11	6.34268e-11	7.5893e-11	9.07053e-11	1.08285e-10	1.29126e-10	1.53805e-10	1.82996e-10	2.17486e-10	2.5819e-10	3.06178e-10	3.62689e-10	4.29167e-10	5.07282e-10	5.98976e-10	7.06494e-10	8.32433e-10	9.79795e-10	1.15204e-09	1.35317e-09	1.58778e-09	1.86116e-09	2.1794e-09	2.54949e-09	2.97943e-09	3.47841e-09	4.05694e-09	4.72705e-09	5.50246e-09	6.39886e-09	7.43412e-09	8.6286e-09	1.00055e-08	1.15911e-08	1.34154e-08	1.55123e-08	1.79203e-08	2.06831e-08	2.38499e-08	2.74766e-08	3.16261e-08	3.63697e-08	4.17874e-08	4.79695e-08	5.50178e-08	6.30464e-08	7.21837e-08	8.25739e-08
1332.64	4.48744e-09	5.18777e-09	5.99211e-09	6.91509e-09	7.97327e-09	9.18543e-09	1.05727e-08	1.21592e-08	1.39718e-08	1.6041e-08	1.84012e-08	2.10911e-08	2.41541e-08	2.76391e-08	3.16009e-08	3.61013e-08	4.12091e-08	4.70018e-08	5.35658e-08	6.0998e-08	6.94064e-08	7.89119e-08	8.96492e-08	1.01768e-07	1.15437e-07	1.3084e-07	1.48187e-07	1.67705e-07	1.89652e-07	2.14311e-07	2.41995e-07	2.73054e-07	3.07872e-07	3.46877e-07	3.9054e-07	4.39382e-07	4.93978e-07	5.54962e-07	6.23032e-07	6.9896e-07	7.83593e-07	8.77862e-07	9.82793e-07	1.09951e-06	1.22925e-06	1.37336e-06	1.53334e-06	1.7108e-06	1.90753e-06
1333.17	0.01734	0.01815	0.019	0.01988	0.02079	0.02174	0.02274	0.02377	0.02484	0.02595	0.02711	0.02831	0.02956	0.03085	0.0322	0.0336	0.03505	0.03655	0.03811	0.03973	0.04141	0.04315	0.04495	0.04682	0.04875	0.05076	0.05283	0.05498	0.0572	0.0595	0.06188	0.06435	0.06689	0.06953	0.07225	0.07506	0.07797	0.08098	0.08408	0.08728	0.09059	0.09401	0.09753	0.10117	0.10492	0.1088	0.11279	0.11691	0.12115
1338.07	0.20194	0.2073	0.21279	0.21839	0.22412	0.22997	0.23595	0.24205	0.24829	0.25467	0.26117	0.26782	0.2746	0.28153	0.2886	0.29582	0.30319	0.31071	0.31838	0.32621	0.3342	0.34234	0.35065	0.35913	0.36777	0.37659	0.38557	0.39473	0.40407	0.41359	0.42329	0.43318	0.44325	0.45352	0.46397	0.47462	0.48547	0.49653	0.50778	0.51924	0.53091	0.54279	0.55488	0.56719	0.57972	0.59248	0.60545	0.61866	0.63209
1349.45	0.00382	0.00404	0.00427	0.0045	0.00475	0.00501	0.00529	0.00558	0.00588	0.0062	0.00653	0.00688	0.00724	0.00762	0.00802	0.00844	0.00888	0.00933	0.00981	0.01031	0.01084	0.01138	0.01195	0.01255	0.01317	0.01382	0.0145	0.01521	0.01594	0.01671	0.01751	0.01835	0.01922	0.02013	0.02107	0.02205	0.02308	0.02414	0.02525	0.0264	0.0276	0.02885	0.03014	0.03149	0.03289	0.03434	0.03585	0.03741	0.03904
1353.21	7.47258e-12	9.21429e-12	1.13455e-11	1.39494e-11	1.71265e-11	2.09973e-11	2.57066e-11	3.14279e-11	3.83692e-11	4.67788e-11	5.69532e-11	6.92461e-11	8.40784e-11	1.0195e-10	1.23456e-10	1.493e-10	1.80317e-10	2.17492e-10	2.61992e-10	3.15188e-10	3.78701e-10	4.54434e-10	5.44622e-10	6.51891e-10	7.79316e-10	9.30497e-10	1.10964e-09	1.32166e-09	1.57228e-09	1.86818e-09	2.21711e-09	2.6281e-09	3.11159e-09	3.67973e-09	4.34655e-09	5.12827e-09	6.04366e-09	7.11435e-09	8.36524e-09	9.82504e-09	1.15267e-08	1.35082e-08	1.58129e-08	1.84905e-08	2.15982e-08	2.5201e-08	2.93734e-08	3.42002e-08	3.97783e-08
1354.39	2.14495e-09	2.55555e-09	3.04095e-09	3.61407e-09	4.28991e-09	5.08592e-09	6.02232e-09	7.12254e-09	8.41368e-09	9.92708e-09	1.16989e-08	1.37708e-08	1.61908e-08	1.90142e-08	2.23043e-08	2.6134e-08	3.05866e-08	3.57577e-08	4.17566e-08	4.87079e-08	5.67541e-08	6.60575e-08	7.68027e-08	8.91999e-08	1.03488e-07	1.19937e-07	1.38855e-07	1.60589e-07	1.85532e-07	2.14129e-07	2.46881e-07	2.84355e-07	3.27186e-07	3.76093e-07	4.3188e-07	4.95454e-07	5.67831e-07	6.50147e-07	7.43679e-07	8.49851e-07	9.70258e-07	1.10668e-06	1.2611e-06	1.43572e-06	1.63302e-06	1.85572e-06	2.10687e-06	2.38985e-06	2.70841e-06
1355.05	3.28008e-09	3.82078e-09	4.44632e-09	5.16931e-09	6.00415e-09	6.96721e-09	8.07715e-09	9.35518e-09	1.08254e-08	1.2515e-08	1.44552e-08	1.66809e-08	1.92319e-08	2.21531e-08	2.54952e-08	2.93155e-08	3.36784e-08	3.86568e-08	4.43324e-08	5.07974e-08	5.8155e-08	6.65215e-08	7.60269e-08	8.68173e-08	9.90561e-08	1.12926e-07	1.28631e-07	1.464e-07	1.66488e-07	1.89178e-07	2.14786e-07	2.43666e-07	2.76208e-07	3.12849e-07	3.54071e-07	4.00411e-07	4.52464e-07	5.1089e-07	5.76417e-07	6.49853e-07	7.32089e-07	8.24112e-07	9.27007e-07	1.04197e-06	1.17033e-06	1.31354e-06	1.4732e-06	1.65106e-06	1.84907e-06
1358.92	8.22972e-06	9.18969e-06	1.0254e-05	1.14331e-05	1.27384e-05	1.41823e-05	1.57785e-05	1.75416e-05	1.94878e-05	2.16345e-05	2.40007e-05	2.6607e-05	2.94758e-05	3.26313e-05	3.60998e-05	3.99096e-05	4.40917e-05	4.86791e-05	5.37078e-05	5.92167e-05	6.52475e-05	7.18453e-05	7.90588e-05	8.69403e-05	9.5546e-05	0.000104937	0.000115177	0.000126337	0.000138492	0.000151722	0.000166114	0.000181759	0.000198756	0.000217212	0.000237239	0.000258958	0.000282497	0.000307996	0.000335599	0.000365464	0.000397758	0.000432657	0.000470351	0.00051104	0.000554937	0.000602269	0.000653276	0.000708214	0.000767353
1364.75	1.15224e-11	1.41342e-11	1.73138e-11	2.1179e-11	2.58715e-11	3.15602e-11	3.84474e-11	4.67741e-11	5.68278e-11	6.89503e-11	8.35479e-11	1.01103e-10	1.22186e-10	1.47475e-10	1.77768e-10	2.14009e-10	2.57311e-10	3.08984e-10	3.70568e-10	4.43873e-10	5.31021e-10	6.345e-10	7.57218e-10	9.02576e-10	1.07454e-09	1.27774e-09	1.51757e-09	1.80028e-09	2.13316e-09	2.52465e-09	2.98455e-09	3.52416e-09	4.15661e-09	4.897e-09	5.7628e-09	6.7741e-09	7.95406e-09	9.32926e-09	1.09303e-08	1.27921e-08	1.4955e-08	1.74648e-08	2.03742e-08	2.37431e-08	2.76401e-08	3.21431e-08	3.73411e-08	4.33351e-08	5.024e-08
1378.37	2.68668e-14	3.44484e-14	4.40934e-14	5.63424e-14	7.18718e-14	9.1527e-14	1.16362e-13	1.4769e-13	1.87143e-13	2.36745e-13	2.99008e-13	3.77034e-13	4.74657e-13	5.96604e-13	7.48694e-13	9.38077e-13	1.17353e-12	1.4658e-12	1.82804e-12	2.27632e-12	2.83021e-12	3.51357e-12	4.3554e-12	5.39089e-12	6.6627e-12	8.22248e-12	1.01326e-11	1.24684e-11	1.53207e-11	1.87985e-11	2.30331e-11	2.81818e-11	3.44333e-11	4.20132e-11	5.1191e-11	6.22883e-11	7.56883e-11	9.18468e-11	1.11306e-10	1.34707e-10	1.62814e-10	1.96526e-10	2.36909e-10	2.85221e-10	3.42943e-10	4.11821e-10	4.93905e-10	5.91604e-10	7.07742e-10
1380.1	0.00224	0.0024	0.00257	0.00275	0.00294	0.00315	0.00336	0.00359	0.00384	0.0041	0.00437	0.00466	0.00497	0.0053	0.00564	0.00601	0.0064	0.00681	0.00724	0.0077	0.00818	0.00869	0.00923	0.00979	0.01039	0.01102	0.01169	0.01239	0.01313	0.0139	0.01472	0.01558	0.01648	0.01743	0.01843	0.01947	0.02057	0.02173	0.02294	0.0242	0.02553	0.02693	0.02839	0.02992	0.03152	0.0332	0.03495	0.03678	0.0387
1380.8	5.30245e-122	1.01836e-120	1.89655e-119	3.42614e-118	6.00565e-117	1.0218e-115	1.68795e-114	2.70814e-113	4.22118e-112	6.39411e-111	9.41536e-110	1.34813e-108	1.87757e-107	2.54419e-106	3.35519e-105	4.30749e-104	5.38505e-103	6.55745e-102	7.77999e-101	8.99577e-100	1.01398e-98	1.11448e-97	1.19474e-96	1.24953e-95	1.27529e-94	1.27048e-93	1.23576e-92	1.17385e-91	1.08922e-90	9.87512e-90	8.74989e-89	7.57877e-88	6.4185e-87	5.31629e-86	4.30749e-85	3.41492e-84	2.64958e-83	2.01237e-82	1.49648e-81	1.08984e-80	7.77463e-80	5.43389e-79	3.72178e-78	2.49857e-77	1.64445e-76	1.06129e-75	6.71758e-75	4.17109e-74	2.54115e-73
1381.7	2.3542e-27	3.97479e-27	6.68307e-27	1.11904e-26	1.8661e-26	3.09929e-26	5.12669e-26	8.44647e-26	1.38609e-25	2.26567e-25	3.68899e-25	5.98324e-25	9.6671e-25	1.55597e-24	2.49495e-24	3.98561e-24	6.34323e-24	1.00583e-23	1.58907e-23	2.50143e-23	3.92343e-23	6.13183e-23	9.54935e-23	1.48193e-22	2.29175e-22	3.53184e-22	5.4243e-22	8.30242e-22	1.26648e-21	1.92545e-21	2.91757e-21	4.40633e-21	6.63299e-21	9.95246e-21	1.48851e-20	2.21914e-20	3.2979e-20	4.88568e-20	7.21531e-20	1.06228e-19	1.55916e-19	2.28148e-19	3.32836e-19	4.84105e-19	7.02031e-19	1.01506e-18	1.46336e-18	2.10354e-18	3.01508e-18
1382.31	1.47066e-39	3.22963e-39	7.04588e-39	1.52716e-38	3.28868e-38	7.03674e-38	1.49609e-37	3.16084e-37	6.63636e-37	1.38472e-36	2.87159e-36	5.91876e-36	1.21258e-35	2.46937e-35	4.99894e-35	1.00602e-34	2.01276e-34	4.00367e-34	7.9182e-34	1.5571e-33	3.04473e-33	5.92031e-33	1.14478e-32	2.20144e-32	4.21031e-32	8.00876e-32	1.51523e-31	2.85153e-31	5.33799e-31	9.9403e-31	1.84146e-30	3.39379e-30	6.22279e-30	1.13523e-29	2.06061e-29	3.72171e-29	6.68869e-29	1.19622e-28	2.12895e-28	3.77074e-28	6.64677e-28	1.1661e-27	2.03618e-27	3.53894e-27	6.12239e-27	1.05433e-26	1.80742e-26	3.08447e-26	5.24036e-26
1383.5	8.26911e-103	7.92848e-102	7.44151e-101	6.83848e-100	6.1542e-99	5.4248e-98	4.68469e-97	3.96411e-96	3.28748e-95	2.67248e-94	2.13001e-93	1.66474e-92	1.27611e-91	9.59596e-91	7.07983e-90	5.12591e-89	3.64258e-88	2.54106e-87	1.74046e-86	1.17066e-85	7.73374e-85	5.01897e-84	3.20021e-83	2.00518e-82	1.23484e-81	7.4752e-81	4.44895e-80	2.60367e-79	1.49857e-78	8.48398e-78	4.72519e-77	2.58943e-76	1.39644e-75	7.41201e-75	3.87269e-74	1.99212e-73	1.00904e-72	5.03337e-72	2.473e-71	1.19693e-70	5.70759e-70	2.68188e-69	1.2419e-68	5.66833e-68	2.55038e-67	1.13134e-66	4.94858e-66	2.13463e-65	9.08187e-65
1386.72	5.6147e-22	7.99394e-22	1.13549e-21	1.60916e-21	2.27518e-21	3.20951e-21	4.51728e-21	6.34359e-21	8.88833e-21	1.24262e-20	1.73339e-20	2.41269e-20	3.35088e-20	4.6438e-20	6.42175e-20	8.86145e-20	1.2202e-19	1.67666e-19	2.29903e-19	3.14587e-19	4.29574e-19	5.85385e-19	7.96084e-19	1.08043e-18	1.46338e-18	1.9781e-18	2.66855e-18	3.5929e-18	4.82794e-18	6.47489e-18	8.66685e-18	1.15786e-17	1.5439e-17	2.05474e-17	2.72946e-17	3.61895e-17	4.78938e-17	6.32665e-17	8.342e-17	1.09793e-16	1.44242e-16	1.89158e-16	2.47618e-16	3.2357e-16	4.22073e-16	5.49597e-16	7.14406e-16	9.27031e-16	1.20087e-15
1431.23	5.33751e-68	1.65656e-67	5.10016e-67	1.55773e-66	4.72016e-66	1.41907e-65	4.23308e-65	1.25296e-64	3.68022e-64	1.07272e-63	3.10314e-63	8.90922e-63	2.53879e-62	7.18097e-62	2.0162e-61	5.61955e-61	1.55492e-60	4.27146e-60	1.16501e-59	3.1549e-59	8.48343e-59	2.2652e-58	6.0064e-58	1.58166e-57	4.13645e-57	1.07443e-56	2.77194e-56	7.1034e-56	1.80821e-55	4.57244e-55	1.14865e-54	2.86673e-54	7.1083e-54	1.75123e-53	4.28689e-53	1.04275e-52	2.52044e-52	6.05412e-52	1.44519e-51	3.42857e-51	8.08422e-51	1.89461e-50	4.41339e-50	1.02193e-49	2.35221e-49	5.38223e-49	1.22432e-48	2.76883e-48	6.22557e-48
1436.46	2.6053e-21	3.983e-21	6.06816e-21	9.21323e-21	1.39408e-20	2.10229e-20	3.15967e-20	4.73312e-20	7.06675e-20	1.05165e-19	1.55996e-19	2.30653e-19	3.39951e-19	4.99459e-19	7.31508e-19	1.06803e-18	1.55457e-18	2.25582e-18	3.26346e-18	4.70699e-18	6.76876e-18	9.70483e-18	1.38736e-17	1.97753e-17	2.81062e-17	3.98321e-17	5.62897e-17	7.93228e-17	1.11468e-16	1.56206e-16	2.18298e-16	3.04239e-16	4.22866e-16	5.86169e-16	8.10375e-16	1.11738e-15	1.53666e-15	2.10777e-15	2.88369e-15	3.93517e-15	5.35644e-15	7.2727e-15	9.84989e-15	1.33073e-14	1.79343e-14	2.41113e-14	3.23375e-14	4.32666e-14	5.77519e-14
1451.78	1.1367e-47	3.35623e-47	9.8071e-47	2.83632e-46	8.1197e-46	2.3011e-45	6.45633e-45	1.79362e-44	4.93417e-44	1.34423e-43	3.62704e-43	9.69371e-43	2.56641e-42	6.73131e-42	1.74924e-41	4.50418e-41	1.14931e-40	2.90635e-40	7.28431e-40	1.80965e-39	4.45662e-39	1.08807e-38	2.6338e-38	6.3215e-38	1.50454e-37	3.55117e-37	8.31296e-37	1.93015e-36	4.44541e-36	1.01567e-35	2.3022e-35	5.17752e-35	1.15536e-34	2.55839e-34	5.62209e-34	1.22615e-33	2.65422e-33	5.70305e-33	1.21643e-32	2.57576e-32	5.41496e-32	1.13027e-31	2.34262e-31	4.82148e-31	9.85477e-31	2.00046e-30	4.03329e-30	8.07726e-30	1.60683e-29
1452.92	2.74439e-15	3.81225e-15	5.28066e-15	7.29415e-15	1.00474e-14	1.38017e-14	1.8907e-14	2.58306e-14	3.51949e-14	4.78263e-14	6.48195e-14	8.76207e-14	1.18135e-13	1.58867e-13	2.13098e-13	2.85119e-13	3.80524e-13	5.06592e-13	6.72765e-13	8.91264e-13	1.17787e-12	1.5529e-12	2.04247e-12	2.68005e-12	3.50843e-12	4.5822e-12	5.97085e-12	7.7626e-12	1.00692e-11	1.3032e-11	1.68291e-11	2.16847e-11	2.78804e-11	3.57686e-11	4.57902e-11	5.8495e-11	7.45673e-11	9.48569e-11	1.20417e-10	1.52551e-10	1.92867e-10	2.43345e-10	3.06419e-10	3.85077e-10	4.82973e-10	6.04577e-10	7.55334e-10	9.41875e-10	1.17225e-09
1453.53	2.37839e-19	3.58928e-19	5.39736e-19	8.08763e-19	1.20764e-18	1.797e-18	2.66477e-18	3.93813e-18	5.80029e-18	8.51437e-18	1.24569e-17	1.8165e-17	2.64024e-17	3.82509e-17	5.52389e-17	7.9518e-17	1.14108e-16	1.63232e-16	2.32781e-16	3.30944e-16	4.69069e-16	6.62837e-16	9.33846e-16	1.31176e-15	1.83719e-15	2.56558e-15	3.5724e-15	4.96008e-15	6.86725e-15	9.48096e-15	1.30529e-14	1.79209e-14	2.45369e-14	3.35039e-14	4.56247e-14	6.19645e-14	8.3933e-14	1.13392e-13	1.52791e-13	2.05348e-13	2.75278e-13	3.68086e-13	4.90947e-13	6.53183e-13	8.66883e-13	1.14768e-12	1.51574e-12	1.99703e-12	2.62485e-12
1454.45	3.08226e-15	4.13946e-15	5.54657e-15	7.41515e-15	9.89093e-15	1.31639e-14	1.74811e-14	2.31631e-14	3.0625e-14	4.04031e-14	5.31889e-14	6.98716e-14	9.15928e-14	1.19815e-13	1.56406e-13	2.03751e-13	2.64884e-13	3.43658e-13	4.4496e-13	5.74969e-13	7.4149e-13	9.54352e-13	1.22592e-12	1.57171e-12	2.01115e-12	2.56854e-12	3.2742e-12	4.16587e-12	5.29048e-12	6.70623e-12	8.48523e-12	1.07166e-11	1.35102e-11	1.70015e-11	2.1357e-11	2.67807e-11	3.3523e-11	4.18897e-11	5.22541e-11	6.50713e-11	8.08946e-11	1.00396e-10	1.2439e-10	1.53862e-10	1.90004e-10	2.34252e-10	2.88335e-10	3.54334e-10	4.34743e-10
1455.12	3.55104e-42	8.84901e-42	2.18683e-41	5.35979e-41	1.30295e-40	3.14187e-40	7.51554e-40	1.78351e-39	4.19917e-39	9.80977e-39	2.274e-38	5.23107e-38	1.19423e-37	2.70592e-37	6.08553e-37	1.35853e-36	3.01064e-36	6.62359e-36	1.44678e-35	3.13773e-35	6.7571e-35	1.44499e-34	3.06871e-34	6.47235e-34	1.35585e-33	2.82116e-33	5.83097e-33	1.19723e-32	2.44208e-32	4.94902e-32	9.96503e-32	1.99372e-31	3.96369e-31	7.83092e-31	1.53754e-30	3.00031e-30	5.8191e-30	1.12181e-29	2.14973e-29	4.09514e-29	7.7553e-29	1.46015e-28	2.73332e-28	5.08741e-28	9.41544e-28	1.73279e-27	3.17126e-27	5.77195e-27	1.04482e-26
1457.82	1.26206e-11	1.59449e-11	2.01078e-11	2.53112e-11	3.18036e-11	3.98895e-11	4.99421e-11	6.24175e-11	7.78724e-11	9.69849e-11	1.2058e-10	1.49658e-10	1.85433e-10	2.29373e-10	2.8325e-10	3.49202e-10	4.29801e-10	5.28138e-10	6.47924e-10	7.936e-10	9.70477e-10	1.1849e-09	1.44443e-09	1.75805e-09	2.13647e-09	2.59236e-09	3.14074e-09	3.79938e-09	4.58926e-09	5.53512e-09	6.66608e-09	8.01639e-09	9.62623e-09	1.15427e-08	1.3821e-08	1.65255e-08	1.97314e-08	2.35264e-08	2.80126e-08	3.33083e-08	3.95513e-08	4.69009e-08	5.55417e-08	6.56869e-08	7.75827e-08	9.15128e-08	1.07804e-07	1.26831e-07	1.49027e-07
1458.76	4.53072e-23	7.54315e-23	1.25004e-22	2.06206e-22	3.38611e-22	5.53532e-22	9.0083e-22	1.45955e-21	2.35445e-21	3.78157e-21	6.0476e-21	9.6303e-21	1.52707e-20	2.41133e-20	3.79184e-20	5.93822e-20	9.2617e-20	1.4387e-19	2.22592e-19	3.43024e-19	5.26542e-19	8.05097e-19	1.22627e-18	1.86064e-18	2.8125e-18	4.23536e-18	6.35435e-18	9.49838e-18	1.41462e-17	2.09922e-17	3.10397e-17	4.57332e-17	6.71453e-17	9.82386e-17	1.43234e-16	2.08123e-16	3.01384e-16	4.34967e-16	6.25668e-16	8.97006e-16	1.28181e-15	1.82576e-15	2.59218e-15	3.66862e-15	5.1757e-15	7.27907e-15	1.02055e-14	1.42646e-14	1.98776e-14
1460.52	9.17916e-70	3.28751e-69	1.16576e-68	4.0932e-68	1.42319e-67	4.90051e-67	1.67121e-66	5.64503e-66	1.88877e-65	6.26035e-65	2.0557e-64	6.68797e-64	2.15592e-63	6.88662e-63	2.17994e-62	6.83883e-62	2.1264e-61	6.55339e-61	2.00205e-60	6.06316e-60	1.82042e-59	5.419e-59	1.59945e-58	4.68121e-58	1.35865e-57	3.91063e-57	1.11636e-56	3.1609e-56	8.8775e-56	2.47327e-55	6.83571e-55	1.87435e-54	5.0992e-54	1.37646e-53	3.68689e-53	9.79984e-53	2.58504e-52	6.76753e-52	1.75846e-51	4.53524e-51	1.16107e-50	2.95076e-50	7.44474e-50	1.86479e-49	4.63767e-49	1.14521e-48	2.80805e-48	6.83737e-48	1.65333e-47
1470.04	6.34005e-20	9.87651e-20	1.53238e-19	2.36808e-19	3.64511e-19	5.58886e-19	8.53591e-19	1.29869e-18	1.96838e-18	2.97214e-18	4.47101e-18	6.70086e-18	1.0006e-17	1.4887e-17	2.20694e-17	3.26e-17	4.79853e-17	7.03839e-17	1.02879e-16	1.49859e-16	2.17549e-16	3.14747e-16	4.53845e-16	6.52245e-16	9.34295e-16	1.33395e-15	1.89841e-15	2.69308e-15	3.80829e-15	5.36838e-15	7.54401e-15	1.05686e-14	1.47607e-14	2.05531e-14	2.85326e-14	3.94923e-14	5.45005e-14	7.49926e-14	1.02891e-13	1.40763e-13	1.92028e-13	2.61226e-13	3.54367e-13	4.79388e-13	6.4674e-13	8.70144e-13	1.16757e-12	1.56248e-12	2.08543e-12
1470.53	9.45848e-17	1.29122e-16	1.75859e-16	2.38958e-16	3.23953e-16	4.38178e-16	5.91337e-16	7.9624e-16	1.06975e-15	1.43404e-15	1.91815e-15	2.56011e-15	3.40953e-15	4.53103e-15	6.00859e-15	7.95113e-15	1.04996e-14	1.3836e-14	1.8195e-14	2.38781e-14	3.12724e-14	4.08738e-14	5.33159e-14	6.9407e-14	9.01758e-14	1.1693e-13	1.51326e-13	1.95461e-13	2.51985e-13	3.24237e-13	4.16417e-13	5.33802e-13	6.83002e-13	8.72292e-13	1.112e-12	1.415e-12	1.79731e-12	2.27883e-12	2.88421e-12	3.64396e-12	4.59579e-12	5.78615e-12	7.27227e-12	9.12442e-12	1.14288e-11	1.42911e-11	1.78402e-11	2.22337e-11	2.76635e-11
1471.35	0.000741824	0.000794472	0.000850517	0.000910155	0.000973593	0.00104	0.00111	0.00119	0.00127	0.00136	0.00145	0.00154	0.00165	0.00175	0.00187	0.00199	0.00212	0.00226	0.0024	0.00256	0.00272	0.00289	0.00307	0.00326	0.00346	0.00367	0.0039	0.00413	0.00438	0.00465	0.00492	0.00522	0.00552	0.00585	0.00619	0.00655	0.00692	0.00732	0.00773	0.00817	0.00863	0.00911	0.00962	0.01015	0.0107	0.01129	0.0119	0.01254	0.01321
1473.53	7.5048e-56	2.9234e-55	1.12287e-54	4.25337e-54	1.58911e-53	5.85679e-53	2.12965e-52	7.64118e-52	2.70568e-51	9.45618e-51	3.2624e-50	1.11122e-49	3.7373e-49	1.24128e-48	4.07189e-48	1.31943e-47	4.22375e-47	1.33594e-46	4.17547e-46	1.28976e-45	3.93773e-45	1.18843e-44	3.54602e-44	1.04617e-43	3.05214e-43	8.80642e-43	2.51326e-42	7.09524e-42	1.9817e-41	5.4764e-41	1.49758e-40	4.05293e-40	1.08562e-39	2.87847e-39	7.5556e-39	1.96355e-38	5.05277e-38	1.28757e-37	3.24949e-37	8.12272e-37	2.01129e-36	4.93376e-36	1.19909e-35	2.88761e-35	6.89096e-35	1.62973e-34	3.82021e-34	8.87633e-34	2.04454e-33
1474.03	2.53724e-08	2.99958e-08	3.54168e-08	4.17648e-08	4.91892e-08	5.78616e-08	6.79793e-08	7.97688e-08	9.34895e-08	1.09439e-07	1.27956e-07	1.49429e-07	1.74301e-07	2.03076e-07	2.36327e-07	2.74707e-07	3.18957e-07	3.69915e-07	4.28532e-07	4.95886e-07	5.73192e-07	6.61822e-07	7.63324e-07	8.79443e-07	1.01214e-06	1.16362e-06	1.33636e-06	1.53313e-06	1.75704e-06	2.01158e-06	2.30064e-06	2.62855e-06	3.00018e-06	3.42091e-06	3.89677e-06	4.43445e-06	5.04138e-06	5.72581e-06	6.49688e-06	7.36475e-06	8.34062e-06	9.43689e-06	1.06673e-05	1.20469e-05	1.35924e-05	1.53221e-05	1.72564e-05	1.94173e-05	2.18292e-05
1474.6	1.61385e-08	1.89978e-08	2.23375e-08	2.62334e-08	3.07731e-08	3.60566e-08	4.21989e-08	4.93314e-08	5.76043e-08	6.71892e-08	7.82817e-08	9.11048e-08	1.05912e-07	1.22992e-07	1.42672e-07	1.65323e-07	1.91366e-07	2.21277e-07	2.55595e-07	2.94928e-07	3.39961e-07	3.91467e-07	4.50318e-07	5.17491e-07	5.94086e-07	6.81337e-07	7.80628e-07	8.9351e-07	1.02172e-06	1.16718e-06	1.33208e-06	1.51882e-06	1.73009e-06	1.9689e-06	2.23858e-06	2.54283e-06	2.88577e-06	3.27197e-06	3.70648e-06	4.1949e-06	4.74344e-06	5.35895e-06	6.04897e-06	6.82187e-06	7.68683e-06	8.65398e-06	9.73447e-06	1.09405e-05	1.22857e-05
1475.74	8.46988e-16	1.15466e-15	1.57025e-15	2.13025e-15	2.88302e-15	3.89251e-15	5.24305e-15	7.04562e-15	9.44587e-15	1.26346e-14	1.68611e-14	2.24502e-14	2.98247e-14	3.9533e-14	5.22852e-14	6.89986e-14	9.08557e-14	1.19377e-13	1.56515e-13	2.04769e-13	2.67333e-13	3.48279e-13	4.52791e-13	5.87447e-13	7.60586e-13	9.82752e-13	1.26725e-12	1.63084e-12	2.09457e-12	2.68486e-12	3.43479e-12	4.38565e-12	5.58897e-12	7.10886e-12	9.02493e-12	1.14359e-11	1.4464e-11	1.826e-11	2.30099e-11	2.89426e-11	3.63392e-11	4.55443e-11	5.69797e-11	7.11605e-11	8.87149e-11	1.10408e-10	1.37168e-10	1.70124e-10	2.10639e-10
1476.37	4.5609e-11	5.68766e-11	7.08062e-11	8.79973e-11	1.09178e-10	1.3523e-10	1.67219e-10	2.06436e-10	2.54433e-10	3.1308e-10	3.84626e-10	4.71766e-10	5.77731e-10	7.06384e-10	8.62338e-10	1.05109e-09	1.2792e-09	1.55443e-09	1.88602e-09	2.28491e-09	2.76405e-09	3.33871e-09	4.02694e-09	4.84997e-09	5.83277e-09	7.00469e-09	8.4001e-09	1.00593e-08	1.20293e-08	1.43652e-08	1.71311e-08	2.04016e-08	2.42634e-08	2.88175e-08	3.41806e-08	4.04881e-08	4.78964e-08	5.65864e-08	6.67665e-08	7.86768e-08	9.25936e-08	1.08834e-07	1.27763e-07	1.49797e-07	1.75414e-07	2.05161e-07	2.39659e-07	2.79621e-07	3.25856e-07
1476.88	3.17176e-11	3.9268e-11	4.85388e-11	5.99041e-11	7.38152e-11	9.0816e-11	1.11561e-10	1.36835e-10	1.67581e-10	2.04926e-10	2.50221e-10	3.05075e-10	3.71407e-10	4.51503e-10	5.48076e-10	6.6435e-10	8.04142e-10	9.71971e-10	1.17318e-09	1.41406e-09	1.70204e-09	2.04585e-09	2.45575e-09	2.9438e-09	3.52409e-09	4.21314e-09	5.03025e-09	5.99794e-09	7.14246e-09	8.49435e-09	1.00891e-08	1.19681e-08	1.41789e-08	1.67771e-08	1.98266e-08	2.34013e-08	2.75867e-08	3.24809e-08	3.81971e-08	4.48652e-08	5.26346e-08	6.16762e-08	7.21861e-08	8.43883e-08	9.85389e-08	1.1493e-07	1.33895e-07	1.55812e-07	1.81114e-07
1481.91	8.1564e-22	1.10975e-21	1.50723e-21	2.04344e-21	2.76554e-21	3.73626e-21	5.0389e-21	6.78396e-21	9.11764e-21	1.22331e-20	1.63853e-20	2.19096e-20	2.92473e-20	3.89771e-20	5.18573e-20	6.888e-20	9.13403e-20	1.20926e-19	1.59836e-19	2.10924e-19	2.77894e-19	3.65544e-19	4.80077e-19	6.295e-19	8.24137e-19	1.07727e-18	1.40597e-18	1.83214e-18	2.38383e-18	3.09692e-18	4.01722e-18	5.20315e-18	6.7291e-18	8.68962e-18	1.12047e-17	1.44266e-17	1.85476e-17	2.38112e-17	3.05243e-17	3.90739e-17	4.99466e-17	6.3754e-17	8.12634e-17	1.03436e-16	1.31475e-16	1.66882e-16	2.11532e-16	2.67761e-16	3.38474e-16
1484.34	3.23573e-09	3.80982e-09	4.48081e-09	5.2642e-09	6.17782e-09	7.24216e-09	8.48074e-09	9.92056e-09	1.15925e-08	1.3532e-08	1.57795e-08	1.83811e-08	2.13896e-08	2.4865e-08	2.88756e-08	3.34993e-08	3.88243e-08	4.49509e-08	5.19928e-08	6.00787e-08	6.93543e-08	7.99842e-08	9.21545e-08	1.06075e-07	1.21982e-07	1.40142e-07	1.60855e-07	1.84457e-07	2.11327e-07	2.41887e-07	2.76615e-07	3.16042e-07	3.60763e-07	4.11444e-07	4.68828e-07	5.33743e-07	6.07115e-07	6.89971e-07	7.83458e-07	8.88847e-07	1.00755e-06	1.14114e-06	1.29136e-06	1.46013e-06	1.64958e-06	1.86208e-06	2.10023e-06	2.36692e-06	2.66531e-06
1484.87	1.42649e-31	2.66435e-31	4.95076e-31	9.1523e-31	1.68339e-30	3.08071e-30	5.60984e-30	1.01648e-29	1.8328e-29	3.28865e-29	5.87249e-29	1.04363e-28	1.8459e-28	3.24956e-28	5.69392e-28	9.93084e-28	1.72411e-27	2.97965e-27	5.12628e-27	8.77998e-27	1.49711e-26	2.54156e-26	4.29584e-26	7.22957e-26	1.21146e-25	2.02141e-25	3.35864e-25	5.55712e-25	9.15652e-25	1.50252e-24	2.45545e-24	3.99652e-24	6.47865e-24	1.04605e-23	1.6823e-23	2.69495e-23	4.30038e-23	6.83575e-23	1.08244e-22	1.70754e-22	2.68351e-22	4.20158e-22	6.55413e-22	1.01864e-21	1.57742e-21	2.4339e-21	3.742e-21	5.73272e-21	8.75161e-21
1486.28	1.45627e-36	3.42759e-36	7.99987e-36	1.85166e-35	4.25067e-35	9.67851e-35	2.18599e-34	4.89792e-34	1.08876e-33	2.4013e-33	5.25513e-33	1.14125e-32	2.45961e-32	5.2611e-32	1.11697e-31	2.35394e-31	4.92457e-31	1.0228e-30	2.10909e-30	4.31829e-30	8.77952e-30	1.77256e-29	3.55414e-29	7.07781e-29	1.39999e-28	2.75067e-28	5.36874e-28	1.041e-27	2.00542e-27	3.8385e-27	7.30042e-27	1.37972e-26	2.5913e-26	4.83677e-26	8.97285e-26	1.65451e-25	3.03246e-25	5.52506e-25	1.00073e-24	1.80205e-24	3.22629e-24	5.74323e-24	1.01659e-23	1.78938e-23	3.13217e-23	5.45255e-23	9.44034e-23	1.62568e-22	2.78459e-22
1489.91	7.13285e-30	1.17024e-29	1.91338e-29	3.11784e-29	5.0634e-29	8.19554e-29	1.32211e-28	2.12582e-28	3.40691e-28	5.44228e-28	8.66555e-28	1.37536e-27	2.17597e-27	3.43174e-27	5.39522e-27	8.45567e-27	1.32111e-26	2.05775e-26	3.19535e-26	4.9468e-26	7.63519e-26	1.17494e-25	1.80267e-25	2.75762e-25	4.2061e-25	6.39673e-25	9.70017e-25	1.46674e-24	2.2115e-24	3.32498e-24	4.98505e-24	7.45308e-24	1.11121e-23	1.65219e-23	2.44981e-23	3.62265e-23	5.34252e-23	7.85781e-23	1.15266e-22	1.68636e-22	2.4607e-22	3.58126e-22	5.19861e-22	7.52698e-22	1.08704e-21	1.56591e-21	2.25007e-21	3.22506e-21	4.61105e-21
1496.47	6.43015e-11	8.19302e-11	1.04174e-10	1.32182e-10	1.67377e-10	2.11511e-10	2.66742e-10	3.35724e-10	4.21707e-10	5.28669e-10	6.6147e-10	8.26031e-10	1.02956e-09	1.28079e-09	1.59033e-09	1.97099e-09	2.43825e-09	3.01075e-09	3.71091e-09	4.56565e-09	5.60723e-09	6.87421e-09	8.41268e-09	1.02775e-08	1.25341e-08	1.52599e-08	1.8547e-08	2.25043e-08	2.72603e-08	3.2967e-08	3.98028e-08	4.79781e-08	5.77393e-08	6.93754e-08	8.32246e-08	9.96818e-08	1.19208e-07	1.42338e-07	1.69697e-07	2.02007e-07	2.40108e-07	2.8497e-07	3.37715e-07	3.99636e-07	4.72223e-07	5.57192e-07	6.56511e-07	7.7244e-07	9.07564e-07
1499.68	1.52183e-07	1.78956e-07	2.10167e-07	2.46505e-07	2.88757e-07	3.37825e-07	3.94736e-07	4.60662e-07	5.36936e-07	6.25075e-07	7.26799e-07	8.44061e-07	9.79072e-07	1.13434e-06	1.31268e-06	1.51729e-06	1.75177e-06	2.02016e-06	2.32703e-06	2.67749e-06	3.07728e-06	3.53284e-06	4.05138e-06	4.64095e-06	5.31055e-06	6.07023e-06	6.93118e-06	7.90587e-06	9.00815e-06	1.02534e-05	1.16588e-05	1.32432e-05	1.50277e-05	1.70354e-05	1.9292e-05	2.18259e-05	2.46682e-05	2.78535e-05	3.14196e-05	3.54082e-05	3.9865e-05	4.48405e-05	5.03896e-05	5.65726e-05	6.34558e-05	7.11112e-05	7.96177e-05	8.90615e-05	9.95363e-05
1504.4	5.03179e-14	6.67119e-14	8.82478e-14	1.16475e-13	1.53389e-13	2.01557e-13	2.64274e-13	3.45755e-13	4.51385e-13	5.8803e-13	7.6442e-13	9.91637e-13	1.28371e-12	1.65839e-12	2.13803e-12	2.7508e-12	3.53205e-12	4.52611e-12	5.78845e-12	7.38828e-12	9.41188e-12	1.19665e-11	1.51853e-11	1.92332e-11	2.43141e-11	3.06795e-11	3.86395e-11	4.85748e-11	6.09532e-11	7.63469e-11	9.54562e-11	1.19135e-10	1.48424e-10	1.84589e-10	2.29166e-10	2.84014e-10	3.51386e-10	4.33999e-10	5.3513e-10	6.58721e-10	8.09507e-10	9.9317e-10	1.21651e-09	1.48765e-09	1.81631e-09	2.21402e-09	2.69455e-09	3.27422e-09	3.97239e-09
1508.39	0	0	0	0	0	0	0	0	0	0	0	0	0	0	0	0	0	0	0	0	0	0	0	0	0	0	0	0	0	0	0	0	0	0	0	0	0	0	0	0	0	0	0	0	0	0	0	0	0
1513.74	1.80771e-16	2.28972e-16	2.89629e-16	3.65856e-16	4.61522e-16	5.8142e-16	7.31489e-16	9.19071e-16	1.15323e-15	1.44515e-15	1.8086e-15	2.26052e-15	2.82173e-15	3.51774e-15	4.37984e-15	5.44631e-15	6.76393e-15	8.38979e-15	1.03935e-14	1.28598e-14	1.58918e-14	1.96145e-14	2.41799e-14	2.97718e-14	3.66129e-14	4.4972e-14	5.5174e-14	6.76102e-14	8.27523e-14	1.01167e-13	1.23536e-13	1.50677e-13	1.8357e-13	2.23387e-13	2.71533e-13	3.29684e-13	3.99838e-13	4.84379e-13	5.86145e-13	7.0851e-13	8.55481e-13	1.03181e-12	1.24314e-12	1.49614e-12	1.7987e-12	2.16014e-12	2.59146e-12	3.10563e-12	3.71793e-12
1536.27	2.04426e-28	3.05343e-28	4.55005e-28	6.76437e-28	1.00329e-27	1.48465e-27	2.1919e-27	3.22867e-27	4.74505e-27	6.95787e-27	1.01797e-26	1.48602e-26	2.16447e-26	3.1457e-26	4.56175e-26	6.60082e-26	9.53066e-26	1.37313e-25	1.9741e-25	2.83205e-25	4.05428e-25	5.79178e-25	8.25659e-25	1.17459e-24	1.66753e-24	2.36247e-24	3.34019e-24	4.71297e-24	6.63651e-24	9.32636e-24	1.30803e-23	1.83089e-23	2.55769e-23	3.566e-23	4.96213e-23	6.89149e-23	9.55258e-23	1.32159e-22	1.82492e-22	2.51518e-22	3.46e-22	4.75085e-22	6.51115e-22	8.9072e-22	1.21626e-21	1.65774e-21	2.25537e-21	3.06291e-21	4.15212e-21
1581.26	1.19014e-137	3.9162e-136	1.24039e-134	3.78325e-133	1.11163e-131	3.14789e-130	8.59452e-129	2.26328e-127	5.75096e-126	1.41058e-124	3.34101e-123	7.64445e-122	1.69032e-120	3.6133e-119	7.4699e-118	1.49403e-116	2.89198e-115	5.41971e-114	9.83686e-113	1.72977e-111	2.94796e-110	4.87084e-109	7.80518e-108	1.2134e-106	1.83067e-105	2.6813e-104	3.81372e-103	5.26938e-102	7.07482e-101	9.23319e-100	1.17167e-98	1.44612e-97	1.73654e-96	2.02945e-95	2.30892e-94	2.55803e-93	2.76055e-92	2.9027e-91	2.97474e-90	2.97206e-89	2.89568e-88	2.75197e-87	2.55187e-86	2.30945e-85	2.04038e-84	1.76027e-83	1.48329e-82	1.22114e-81	9.82433e-81
1584.34	6.81909e-106	6.48115e-105	6.03467e-104	5.5057e-103	4.92277e-102	4.31445e-101	3.70714e-100	3.1234e-99	2.58089e-98	2.09191e-97	1.6635e-96	1.29804e-95	9.94051e-95	7.47243e-94	5.51469e-93	3.99631e-92	2.84412e-91	1.98819e-90	1.36541e-89	9.21367e-89	6.10991e-88	3.98236e-87	2.55162e-86	1.60743e-85	9.95754e-85	6.0666e-84	3.63561e-83	2.14345e-82	1.24342e-81	7.09831e-81	3.98831e-80	2.20588e-79	1.20115e-78	6.44013e-78	3.40046e-77	1.76843e-76	9.05945e-76	4.57238e-75	2.27388e-74	1.11438e-73	5.38275e-73	2.5629e-72	1.20302e-71	5.56788e-71	2.54116e-70	1.14382e-69	5.07836e-69	2.22423e-68	9.61133e-68
1591.04	3.89587e-69	2.16905e-68	1.18587e-67	6.36785e-67	3.35906e-66	1.74098e-65	8.86751e-65	4.43938e-64	2.18492e-63	1.05735e-62	5.03209e-62	2.35561e-61	1.08482e-60	4.91576e-60	2.19216e-59	9.62229e-59	4.15797e-58	1.7691e-57	7.41247e-57	3.05904e-56	1.24362e-55	4.98125e-55	1.96611e-54	7.64824e-54	2.9327e-53	1.10864e-52	4.13238e-52	1.519e-51	5.50716e-51	1.96958e-50	6.94956e-50	2.4196e-49	8.31362e-49	2.81943e-48	9.43875e-48	3.11969e-47	1.01814e-46	3.28145e-46	1.04458e-45	3.28466e-45	1.0204e-44	3.13211e-44	9.50048e-44	2.84807e-43	8.43928e-43	2.47209e-42	7.15946e-42	2.05024e-41	5.80619e-41
1597.72	6.1962e-56	1.89502e-55	5.74092e-55	1.72292e-54	5.12268e-54	1.50908e-53	4.40502e-53	1.27419e-52	3.65264e-52	1.03776e-51	2.92239e-51	8.15764e-51	2.25739e-50	6.19296e-50	1.6845e-49	4.54312e-49	1.21501e-48	3.22242e-48	8.47596e-48	2.21122e-47	5.72189e-47	1.46874e-46	3.74002e-46	9.4484e-46	2.36825e-45	5.88993e-45	1.45357e-44	3.55984e-44	8.65215e-44	2.08711e-43	4.99713e-43	1.18762e-42	2.80185e-42	6.5622e-42	1.52587e-41	3.52268e-41	8.07509e-41	1.83808e-40	4.15478e-40	9.32668e-40	2.07934e-39	4.60436e-39	1.01271e-38	2.21255e-38	4.80199e-38	1.03537e-37	2.21786e-37	4.72028e-37	9.98199e-37
1598.72	3.30427e-84	3.96975e-83	4.62184e-82	5.21676e-81	5.71074e-80	6.06536e-79	6.25258e-78	6.25843e-77	6.08464e-76	5.74815e-75	5.2784e-74	4.71318e-73	4.0937e-72	3.45988e-71	2.84641e-70	2.2802e-69	1.77924e-68	1.35278e-67	1.00252e-66	7.24385e-66	5.10503e-65	3.51007e-64	2.35537e-63	1.54297e-62	9.87068e-62	6.16817e-61	3.76629e-60	2.24774e-59	1.31153e-58	7.48405e-58	4.17773e-57	2.28198e-56	1.22003e-55	6.38605e-55	3.27352e-54	1.64374e-53	8.08718e-53	3.89962e-52	1.84339e-51	8.54463e-51	3.88468e-50	1.73265e-49	7.58339e-49	3.25776e-48	1.37397e-47	5.69039e-47	2.31479e-46	9.25088e-46	3.63292e-45
1600.55	1.01299e-102	1.88152e-101	3.37233e-100	5.8352e-99	9.75159e-98	1.57461e-96	2.45769e-95	3.70956e-94	5.41669e-93	7.65487e-92	1.04739e-90	1.38808e-89	1.78249e-88	2.21877e-87	2.67815e-86	3.13588e-85	3.56326e-84	3.93057e-83	4.21058e-82	4.3819e-81	4.4317e-80	4.35729e-79	4.1663e-78	3.87543e-77	3.5081e-76	3.09136e-75	2.65275e-74	2.21744e-73	1.80616e-72	1.43398e-71	1.11008e-70	8.38147e-70	6.17409e-69	4.43857e-68	3.11502e-67	2.13479e-66	1.42905e-65	9.34687e-65	5.97493e-64	3.73396e-63	2.28189e-62	1.36405e-61	7.97788e-61	4.56654e-60	2.55883e-59	1.40399e-58	7.54508e-58	3.97241e-57	2.04947e-56
1607.14	7.81152e-31	1.44281e-30	2.65137e-30	4.84773e-30	8.81926e-30	1.5965e-29	2.87585e-29	5.15515e-29	9.19632e-29	1.63268e-28	2.88481e-28	5.0732e-28	8.88e-28	1.54713e-27	2.6831e-27	4.63195e-27	7.96019e-27	1.36185e-26	2.31954e-26	3.93328e-26	6.64055e-26	1.11626e-25	1.86833e-25	3.11377e-25	5.16748e-25	8.53974e-25	1.4054e-24	2.30335e-24	3.75957e-24	6.11154e-24	9.89492e-24	1.59565e-23	2.56295e-23	4.10047e-23	6.53483e-23	1.03742e-22	1.64063e-22	2.58471e-22	4.05674e-22	6.34332e-22	9.88201e-22	1.53382e-21	2.37204e-21	3.65507e-21	5.61193e-21	8.58584e-21	1.30894e-20	1.98856e-20	3.01057e-20
1607.83	1.81746e-46	5.05449e-46	1.39238e-45	3.79964e-45	1.02724e-44	2.75157e-44	7.30312e-44	1.92084e-43	5.00688e-43	1.29352e-42	3.31238e-42	8.40832e-42	2.11599e-41	5.27945e-41	1.30608e-40	3.20397e-40	7.7944e-40	1.88055e-39	4.50014e-39	1.06817e-38	2.51516e-38	5.87527e-38	1.36164e-37	3.13112e-37	7.1445e-37	1.61775e-36	3.63536e-36	8.10796e-36	1.79488e-35	3.94408e-35	8.60352e-35	1.86318e-34	4.006e-34	8.55211e-34	1.81289e-33	3.81622e-33	7.97788e-33	1.65639e-32	3.41573e-32	6.99649e-32	1.42357e-31	2.87746e-31	5.77823e-31	1.15282e-30	2.28528e-30	4.50145e-30	8.81098e-30	1.71389e-29	3.31324e-29
1618.76	1.48982e-184	1.01978e-182	6.69507e-181	4.21749e-179	2.55024e-177	1.48086e-175	8.26081e-174	4.42876e-172	2.28277e-170	1.1317e-168	5.3983e-167	2.47859e-165	1.09581e-163	4.66677e-162	1.91515e-160	7.57632e-159	2.89026e-157	1.06364e-155	3.77736e-154	1.295e-152	4.28733e-151	1.37118e-149	4.23776e-148	1.26608e-146	3.65778e-145	1.02222e-143	2.76431e-142	7.23576e-141	1.83391e-139	4.502e-138	1.07079e-136	2.46836e-135	5.51639e-134	1.19557e-132	2.51362e-131	5.12815e-130	1.01551e-128	1.95256e-127	3.64621e-126	6.61489e-125	1.1662e-123	1.99854e-122	3.33017e-121	5.397e-120	8.50923e-119	1.30557e-117	1.94982e-116	2.83526e-115	4.01521e-114
1621.86	3.7452e-17	5.30987e-17	7.50664e-17	1.05821e-16	1.48754e-16	2.08521e-16	2.91489e-16	4.06349e-16	5.64923e-16	7.83253e-16	1.08305e-15	1.4936e-15	2.05434e-15	2.8182e-15	3.85604e-15	5.26249e-15	7.16357e-15	9.7267e-15	1.31737e-14	1.77979e-14	2.39857e-14	3.22456e-14	4.32445e-14	5.78553e-14	7.72173e-14	1.02815e-13	1.36575e-13	1.80999e-13	2.39316e-13	3.15697e-13	4.15507e-13	5.45639e-13	7.14922e-13	9.34645e-13	1.21921e-12	1.58693e-12	2.06109e-12	2.67116e-12	3.45445e-12	4.45797e-12	5.74097e-12	7.37784e-12	9.46186e-12	1.21098e-11	1.54672e-11	1.97158e-11	2.50813e-11	3.18438e-11	4.03504e-11
1622.29	3.29548e-37	7.3368e-37	1.62164e-36	3.55871e-36	7.75436e-36	1.67782e-35	3.60509e-35	7.69284e-35	1.63036e-34	3.4319e-34	7.17574e-34	1.49041e-33	3.07521e-33	6.30383e-33	1.28386e-32	2.59802e-32	5.22396e-32	1.0438e-31	2.07263e-31	4.0901e-31	8.02194e-31	1.56381e-30	3.03017e-30	5.83657e-30	1.11757e-29	2.12738e-29	4.02616e-29	7.57589e-29	1.41741e-28	2.63695e-28	4.87834e-28	8.97489e-28	1.64208e-27	2.98807e-27	5.40801e-27	9.7355e-27	1.7433e-26	3.10528e-26	5.50256e-26	9.70029e-26	1.7013e-25	2.96874e-25	5.15442e-25	8.90479e-25	1.53082e-24	2.61876e-24	4.45825e-24	7.55343e-24	1.27367e-23
1625.65	1.02652e-06	1.16282e-06	1.31611e-06	1.48836e-06	1.68175e-06	1.89869e-06	2.14186e-06	2.41419e-06	2.71895e-06	3.05971e-06	3.44042e-06	3.86543e-06	4.33951e-06	4.86792e-06	5.45643e-06	6.11135e-06	6.83962e-06	7.64884e-06	8.54732e-06	9.54416e-06	1.06493e-05	1.18736e-05	1.32288e-05	1.4728e-05	1.63851e-05	1.82155e-05	2.02358e-05	2.24642e-05	2.49204e-05	2.76256e-05	3.06032e-05	3.38781e-05	3.74777e-05	4.14314e-05	4.5771e-05	5.05311e-05	5.57488e-05	6.14643e-05	6.7721e-05	7.45656e-05	8.20483e-05	9.02235e-05	9.91494e-05	0.000108889	0.000119509	0.000131082	0.000143686	0.000157403	0.000172324
1627.05	2.33582e-44	6.61686e-44	1.85516e-43	5.14844e-43	1.41441e-42	3.84704e-42	1.03603e-41	2.76281e-41	7.29644e-41	1.90849e-40	4.9446e-40	1.26904e-39	3.22673e-39	8.12894e-39	2.02922e-38	5.01979e-38	1.23068e-37	2.9905e-37	7.20313e-37	1.71995e-36	4.0716e-36	9.55662e-36	2.22419e-35	5.13339e-35	1.175e-34	2.6675e-34	6.00682e-34	1.34181e-33	2.97357e-33	6.53792e-33	1.4263e-32	3.08763e-32	6.63308e-32	1.41421e-31	2.99264e-31	6.28593e-31	1.31066e-30	2.71299e-30	5.57538e-30	1.13763e-29	2.30493e-29	4.63742e-29	9.26586e-29	1.83872e-28	3.62407e-28	7.09507e-28	1.37983e-27	2.66583e-27	5.11687e-27
1628.85	5.90252e-25	9.10031e-25	1.39871e-24	2.14319e-24	3.2739e-24	4.98599e-24	7.57056e-24	1.14605e-23	1.72977e-23	2.60311e-23	3.90593e-23	5.84375e-23	8.71777e-23	1.2968e-22	1.92356e-22	2.84519e-22	4.19659e-22	6.17267e-22	9.05415e-22	1.32443e-21	1.93209e-21	2.81093e-21	4.07855e-21	5.90204e-21	8.5182e-21	1.22617e-20	1.76044e-20	2.52096e-20	3.60073e-20	5.12988e-20	7.28989e-20	1.03334e-19	1.46108e-19	2.06078e-19	2.89945e-19	4.06947e-19	5.69776e-19	7.95836e-19	1.10892e-18	1.54151e-18	2.13781e-18	2.95781e-18	4.08284e-18	5.62277e-18	7.72577e-18	1.05912e-17	1.44865e-17	1.97702e-17	2.69208e-17
1638.46	1.67766e-10	2.05934e-10	2.52394e-10	3.08861e-10	3.77384e-10	4.60412e-10	5.60862e-10	6.82209e-10	8.28584e-10	1.00489e-09	1.21693e-09	1.47157e-09	1.77696e-09	2.14265e-09	2.57996e-09	3.10216e-09	3.72486e-09	4.46638e-09	5.34816e-09	6.39532e-09	7.63718e-09	9.10795e-09	1.08475e-08	1.29023e-08	1.53261e-08	1.81816e-08	2.15413e-08	2.54892e-08	3.01222e-08	3.55524e-08	4.19089e-08	4.93406e-08	5.80185e-08	6.81391e-08	7.99279e-08	9.36433e-08	1.09581e-07	1.28079e-07	1.49523e-07	1.74353e-07	2.0307e-07	2.36245e-07	2.74525e-07	3.18646e-07	3.69442e-07	4.27856e-07	4.94957e-07	5.71951e-07	6.602e-07
1643.06	1.36398e-76	6.82728e-76	3.36826e-75	1.63809e-74	7.85412e-74	3.71316e-73	1.73113e-72	7.95992e-72	3.61025e-71	1.61535e-70	7.13101e-70	3.1063e-69	1.33535e-68	5.66572e-68	2.3729e-67	9.81104e-67	4.00511e-66	1.61445e-65	6.42685e-65	2.52687e-64	9.81352e-64	3.76508e-63	1.42718e-62	5.34546e-62	1.97851e-61	7.23749e-61	2.61684e-60	9.35304e-60	3.30491e-59	1.15463e-58	3.98881e-58	1.36273e-57	4.60449e-57	1.53888e-56	5.08768e-56	1.66407e-55	5.38516e-55	1.72443e-54	5.46451e-54	1.71379e-53	5.31992e-53	1.63468e-52	4.9726e-52	1.49759e-51	4.46582e-51	1.3187e-50	3.85628e-50	1.11687e-49	3.20399e-49
1646.6	5.24944e-18	7.05676e-18	9.46764e-18	1.26773e-17	1.69421e-17	2.2598e-17	3.00841e-17	3.99739e-17	5.30143e-17	7.01766e-17	9.27214e-17	1.22282e-16	1.60969e-16	2.11508e-16	2.77409e-16	3.63187e-16	4.74635e-16	6.19177e-16	8.06308e-16	1.04815e-15	1.36014e-15	1.76194e-15	2.27851e-15	2.94147e-15	3.79088e-15	4.87732e-15	6.26459e-15	8.03304e-15	1.02836e-14	1.31432e-14	1.67704e-14	2.13638e-14	2.71716e-14	3.45029e-14	4.37426e-14	5.5369e-14	6.99756e-14	8.82976e-14	1.11244e-13	1.39939e-13	1.75766e-13	2.2043e-13	2.76027e-13	3.4513e-13	4.30889e-13	5.37164e-13	6.68667e-13	8.3115e-13	1.03162e-12
1649	4.05775e-32	7.02439e-32	1.21124e-31	2.08049e-31	3.55977e-31	6.06756e-31	1.03028e-30	1.74282e-30	2.93711e-30	4.93142e-30	8.24929e-30	1.37489e-29	2.28314e-29	3.7777e-29	6.22818e-29	1.02316e-28	1.67491e-28	2.73217e-28	4.44129e-28	7.19455e-28	1.16146e-27	1.86861e-27	2.99612e-27	4.78781e-27	7.62539e-27	1.21044e-26	1.91511e-26	3.0201e-26	4.7472e-26	7.43792e-26	1.16165e-25	1.80848e-25	2.80661e-25	4.34198e-25	6.6964e-25	1.02956e-24	1.57808e-24	2.41147e-24	3.67385e-24	5.58027e-24	8.45071e-24	1.27598e-23	1.92097e-23	2.88355e-23	4.31593e-23	6.44128e-23	9.5858e-23	1.4225e-22	2.10501e-22
1650.18	5.50164e-44	1.42772e-43	3.67285e-43	9.36719e-43	2.36862e-42	5.93872e-42	1.47652e-41	3.64053e-41	8.90235e-41	2.15919e-40	5.19465e-40	1.23975e-39	2.9353e-39	6.8952e-39	1.60712e-38	3.71693e-38	8.53081e-38	1.9431e-37	4.39265e-37	9.85639e-37	2.19532e-36	4.85394e-36	1.06546e-35	2.32197e-35	5.02436e-35	1.07954e-34	2.30332e-34	4.88043e-34	1.02702e-33	2.14656e-33	4.45634e-33	9.18988e-33	1.88263e-32	3.83151e-32	7.74733e-32	1.55645e-31	3.10704e-31	6.16325e-31	1.21493e-30	2.38011e-30	4.63414e-30	8.96795e-30	1.72502e-29	3.29834e-29	6.26932e-29	1.18466e-28	2.22555e-28	4.15695e-28	7.72023e-28
1652.81	1.10368e-53	3.96834e-53	1.40849e-52	4.93557e-52	1.7077e-51	5.83494e-51	1.96908e-50	6.56371e-50	2.16146e-49	7.03251e-49	2.26096e-48	7.18366e-48	2.25591e-47	7.0028e-47	2.14905e-46	6.52075e-46	1.95647e-45	5.80529e-45	1.70372e-44	4.94586e-44	1.42039e-43	4.03587e-43	1.1347e-42	3.15709e-42	8.69355e-42	2.36951e-41	6.39319e-41	1.70772e-40	4.51648e-40	1.1828e-39	3.06758e-39	7.87944e-39	2.00471e-38	5.05248e-38	1.26154e-37	3.12087e-37	7.6502e-37	1.85837e-36	4.47398e-36	1.06757e-35	2.52511e-35	5.92083e-35	1.37639e-34	3.17247e-34	7.25078e-34	1.64339e-33	3.69407e-33	8.23591e-33	1.82136e-32
1659.07	1.47905e-46	3.77628e-46	9.56488e-46	2.40359e-45	5.99286e-45	1.48263e-44	3.63983e-44	8.86769e-44	2.14412e-43	5.14545e-43	1.22564e-42	2.89796e-42	6.8021e-42	1.58504e-41	3.66698e-41	8.42321e-41	1.9212e-40	4.35131e-40	9.78692e-40	2.18613e-39	4.84992e-39	1.06868e-38	2.33906e-38	5.08557e-38	1.09842e-37	2.35694e-37	5.02467e-37	1.06431e-36	2.24003e-36	4.6848e-36	9.73643e-36	2.01096e-35	4.12789e-35	8.42158e-35	1.70775e-34	3.44224e-34	6.89711e-34	1.3738e-33	2.72041e-33	5.35574e-33	1.04834e-32	2.04032e-32	3.94854e-32	7.59859e-32	1.45415e-31	2.76751e-31	5.23828e-31	9.86119e-31	1.84643e-30
1659.75	2.23087e-145	8.04225e-144	2.79095e-142	9.32767e-141	3.00341e-139	9.32072e-138	2.78898e-136	8.04956e-135	2.24179e-133	6.0267e-132	1.56455e-130	3.92358e-129	9.50869e-128	2.22772e-126	5.04731e-125	1.1063e-123	2.34666e-122	4.81885e-121	9.58304e-120	1.84619e-118	3.44677e-117	6.23809e-116	1.09481e-114	1.86388e-113	3.07912e-112	4.93747e-111	7.68757e-110	1.16256e-108	1.70812e-107	2.43912e-106	3.386e-105	4.57101e-104	6.00258e-103	7.66992e-102	9.53888e-101	1.155e-99	1.36197e-98	1.56451e-97	1.75119e-96	1.91052e-95	2.03213e-94	2.10791e-93	2.13288e-92	2.10577e-91	2.02907e-90	1.9087e-89	1.75326e-88	1.573e-87	1.37878e-86
1660.05	1.05451e-10	1.25945e-10	1.50251e-10	1.79044e-10	2.13114e-10	2.53382e-10	3.00924e-10	3.5699e-10	4.23037e-10	5.00755e-10	5.92107e-10	6.9937e-10	8.25178e-10	9.72581e-10	1.1451e-09	1.34681e-09	1.58239e-09	1.85725e-09	2.17761e-09	2.55062e-09	2.98447e-09	3.48859e-09	4.07376e-09	4.75235e-09	5.53847e-09	6.44826e-09	7.50016e-09	8.71517e-09	1.01172e-08	1.17336e-08	1.35951e-08	1.57371e-08	1.81994e-08	2.10273e-08	2.4272e-08	2.79915e-08	3.22513e-08	3.71256e-08	4.26978e-08	4.90621e-08	5.63247e-08	6.46048e-08	7.40368e-08	8.47713e-08	9.69776e-08	1.10845e-07	1.26587e-07	1.44441e-07	1.64674e-07
1666.32	7.30061e-15	9.41351e-15	1.21168e-14	1.55695e-14	1.99718e-14	2.55753e-14	3.26955e-14	4.17278e-14	5.31666e-14	6.76288e-14	8.58836e-14	1.08888e-13	1.3783e-13	1.74183e-13	2.19772e-13	2.76853e-13	3.4821e-13	4.37271e-13	5.48256e-13	6.86348e-13	8.57902e-13	1.0707e-12	1.33426e-12	1.6602e-12	2.06266e-12	2.5589e-12	3.16983e-12	3.92089e-12	4.84284e-12	5.97295e-12	7.35621e-12	9.04691e-12	1.11105e-11	1.36255e-11	1.66866e-11	2.04071e-11	2.49228e-11	3.03961e-11	3.7021e-11	4.50292e-11	5.46963e-11	6.63504e-11	8.03814e-11	9.72517e-11	1.1751e-10	1.41803e-10	1.709e-10	2.05704e-10	2.47283e-10
1670.41	5.61716e-44	1.18498e-43	2.48645e-43	5.18973e-43	1.07751e-42	2.22547e-42	4.57264e-42	9.34698e-42	1.90086e-41	3.84611e-41	7.74285e-41	1.55096e-40	3.0913e-40	6.13106e-40	1.21004e-39	2.37655e-39	4.64508e-39	9.03558e-39	1.74923e-38	3.37042e-38	6.46369e-38	1.23382e-37	2.34428e-37	4.43374e-37	8.34734e-37	1.56444e-36	2.91886e-36	5.42161e-36	1.00257e-35	1.84583e-35	3.38351e-35	6.1753e-35	1.12222e-34	2.03066e-34	3.65891e-34	6.56499e-34	1.173e-33	2.08716e-33	3.69846e-33	6.52689e-33	1.14716e-32	2.00811e-32	3.50112e-32	6.07993e-32	1.05165e-31	1.81193e-31	3.10969e-31	5.31634e-31	9.05399e-31
1670.98	1.3602e-46	3.80116e-46	1.05213e-45	2.88468e-45	7.83508e-45	2.10835e-44	5.62126e-44	1.48509e-43	3.88811e-43	1.00885e-42	2.5945e-42	6.61388e-42	1.67136e-41	4.18724e-41	1.04008e-40	2.56167e-40	6.25647e-40	1.51537e-39	3.64021e-39	8.6733e-39	2.04987e-38	4.80603e-38	1.11788e-37	2.57981e-37	5.90733e-37	1.34227e-36	3.02668e-36	6.7733e-36	1.50443e-35	3.31674e-35	7.25856e-35	1.57695e-34	3.40128e-34	7.28376e-34	1.54876e-33	3.27008e-33	6.85656e-33	1.42776e-32	2.95281e-32	6.06557e-32	1.23764e-31	2.50858e-31	5.05127e-31	1.01051e-30	2.00849e-30	3.9666e-30	7.78416e-30	1.51801e-29	2.94194e-29
1671.61	4.25608e-31	7.90613e-31	1.46111e-30	2.6865e-30	4.91465e-30	8.94581e-30	1.62026e-29	2.92016e-29	5.23725e-29	9.34742e-29	1.66031e-28	2.93505e-28	5.16398e-28	9.04307e-28	1.57625e-27	2.73482e-27	4.7233e-27	8.12063e-27	1.38988e-26	2.36825e-26	4.01749e-26	6.78539e-26	1.14105e-25	1.91054e-25	3.1853e-25	5.28809e-25	8.74216e-25	1.43921e-24	2.35956e-24	3.85261e-24	6.26482e-24	1.01463e-23	1.6367e-23	2.62968e-23	4.20849e-23	6.70893e-23	1.06536e-22	1.68528e-22	2.65579e-22	4.16939e-22	6.52116e-22	1.01616e-21	1.57761e-21	2.44034e-21	3.7612e-21	5.77619e-21	8.83912e-21	1.34785e-20	2.0481e-20
1674.08	1.73549e-19	2.57047e-19	3.79491e-19	5.5847e-19	8.19257e-19	1.19804e-18	1.7465e-18	2.53817e-18	3.67737e-18	5.31167e-18	7.64914e-18	1.09823e-17	1.57211e-17	2.24384e-17	3.19325e-17	4.5312e-17	6.41128e-17	9.04562e-17	1.27263e-16	1.78546e-16	2.49798e-16	3.4852e-16	4.84931e-16	6.72903e-16	9.31228e-16	1.28529e-15	1.76927e-15	2.42912e-15	3.32637e-15	4.5433e-15	6.18956e-15	8.41094e-15	1.14008e-14	1.54149e-14	2.07907e-14	2.79724e-14	3.75432e-14	5.02671e-14	6.71419e-14	8.94687e-14	1.18939e-13	1.57747e-13	2.08733e-13	2.75562e-13	3.6296e-13	4.76995e-13	6.25453e-13	8.18291e-13	1.06822e-12
1674.93	1.10156e-39	2.78514e-39	6.97789e-39	1.73252e-38	4.26331e-38	1.03985e-37	2.51411e-37	6.02597e-37	1.43198e-36	3.37402e-36	7.88314e-36	1.82652e-35	4.19723e-35	9.56634e-35	2.16277e-34	4.85054e-34	1.07924e-33	2.3825e-33	5.21873e-33	1.13435e-32	2.44688e-32	5.23834e-32	1.11308e-31	2.34766e-31	4.9154e-31	1.02171e-30	2.10847e-30	4.3203e-30	8.79016e-30	1.77601e-29	3.56361e-29	7.10165e-29	1.40567e-28	2.7637e-28	5.39774e-28	1.0473e-27	2.01884e-27	3.86659e-27	7.35832e-27	1.39149e-26	2.61493e-26	4.88367e-26	9.06492e-26	1.6724e-25	3.0669e-25	5.59073e-25	1.01315e-24	1.82531e-24	3.26955e-24
1675.51	3.09217e-21	5.08333e-21	8.31691e-21	1.35433e-20	2.19512e-20	3.54143e-20	5.68731e-20	9.09207e-20	1.44699e-19	2.29261e-19	3.61642e-19	5.67976e-19	8.88179e-19	1.38296e-18	2.14423e-18	3.31062e-18	5.09023e-18	7.79423e-18	1.1886e-17	1.80526e-17	2.73088e-17	4.11473e-17	6.17551e-17	9.23237e-17	1.37492e-16	2.03979e-16	3.01473e-16	4.439e-16	6.51194e-16	9.51786e-16	1.38608e-15	2.01127e-15	2.90804e-15	4.18983e-15	6.0155e-15	8.60677e-15	1.2272e-14	1.74387e-14	2.46973e-14	3.48607e-14	4.9044e-14	6.87724e-14	9.61245e-14	1.33924e-13	1.85996e-13	2.57501e-13	3.55386e-13	4.88967e-13	6.70702e-13
1687.84	3.19613e-20	4.82534e-20	7.26009e-20	1.08863e-19	1.62687e-19	2.42312e-19	3.59712e-19	5.32241e-19	7.84956e-19	1.15393e-18	1.6909e-18	2.46989e-18	3.59638e-18	5.22032e-18	7.55407e-18	1.08976e-17	1.56731e-17	2.24731e-17	3.21271e-17	4.57918e-17	6.50762e-17	9.22119e-17	1.30284e-16	1.83547e-16	2.57848e-16	3.61203e-16	5.0457e-16	7.02882e-16	9.76441e-16	1.35276e-15	1.86904e-15	2.57541e-15	3.53928e-15	4.85105e-15	6.63157e-15	9.04205e-15	1.22969e-14	1.66807e-14	2.257e-14	3.04618e-14	4.10105e-14	5.50757e-14	7.37834e-14	9.86054e-14	1.3146e-13	1.74843e-13	2.31992e-13	3.07096e-13	4.05566e-13
1688.48	1.04937e-28	1.77062e-28	2.97579e-28	4.9816e-28	8.30692e-28	1.37984e-27	2.28321e-27	3.76363e-27	6.18047e-27	1.01112e-26	1.64804e-26	2.67622e-26	4.32993e-26	6.98002e-26	1.12114e-25	1.79434e-25	2.86155e-25	4.54738e-25	7.20106e-25	1.13637e-24	1.78706e-24	2.80073e-24	4.37445e-24	6.80939e-24	1.05642e-23	1.6335e-23	2.51749e-23	3.86716e-23	5.92112e-23	9.03679e-23	1.37478e-22	2.08482e-22	3.15164e-22	4.74945e-22	7.1351e-22	1.06861e-21	1.59553e-21	2.37506e-21	3.52479e-21	5.21547e-21	7.6942e-21	1.13176e-20	1.65987e-20	2.42736e-20	3.53951e-20	5.14649e-20	7.46185e-20	1.07885e-19	1.55546e-19
1689.28	1.36483e-27	2.58586e-27	4.86927e-27	9.11338e-27	1.69542e-26	3.13534e-26	5.76401e-26	1.05347e-25	1.91426e-25	3.45848e-25	6.21299e-25	1.10986e-24	1.97159e-24	3.48308e-24	6.11975e-24	1.06943e-23	1.85882e-23	3.21378e-23	5.52725e-23	9.45664e-23	1.60962e-22	2.72576e-22	4.59253e-22	7.69909e-22	1.28431e-21	2.13187e-21	3.52159e-21	5.78921e-21	9.47163e-21	1.54232e-20	2.4997e-20	4.0326e-20	6.47569e-20	1.03516e-19	1.6473e-19	2.60974e-19	4.11623e-19	6.46397e-19	1.01068e-18	1.57349e-18	2.4393e-18	3.76561e-18	5.78885e-18	8.86246e-18	1.35125e-17	2.05191e-17	3.10339e-17	4.67506e-17	7.01497e-17
1692.78	1.3186e-23	2.19141e-23	3.62557e-23	5.97159e-23	9.79224e-23	1.59871e-22	2.59878e-22	4.20629e-22	6.77913e-22	1.08795e-21	1.73871e-21	2.76717e-21	4.38588e-21	6.92314e-21	1.08841e-20	1.70427e-20	2.65802e-20	4.12922e-20	6.38969e-20	9.84942e-20	1.51243e-19	2.3136e-19	3.52585e-19	5.35325e-19	8.09772e-19	1.22043e-18	1.83268e-18	2.74216e-18	4.08834e-18	6.07384e-18	8.99199e-18	1.32659e-17	1.95039e-17	2.85773e-17	4.17301e-17	6.07323e-17	8.80938e-17	1.27362e-16	1.83532e-16	2.63621e-16	3.77443e-16	5.38694e-16	7.66412e-16	1.08699e-15	1.53689e-15	2.16633e-15	3.0443e-15	4.26519e-15	5.95787e-15
1693.48	2.85887e-35	5.77021e-35	1.15783e-34	2.30978e-34	4.58137e-34	9.03519e-34	1.77181e-33	3.45507e-33	6.70002e-33	1.29209e-32	2.47817e-32	4.72725e-32	8.96902e-32	1.69262e-31	3.17741e-31	5.93339e-31	1.10222e-30	2.037e-30	3.7453e-30	6.85133e-30	1.24702e-29	2.25841e-29	4.06984e-29	7.29825e-29	1.30239e-28	2.31295e-28	4.08799e-28	7.19099e-28	1.25898e-27	2.19392e-27	3.80548e-27	6.57055e-27	1.12931e-26	1.93225e-26	3.29129e-26	5.58134e-26	9.42316e-26	1.584e-25	2.65114e-25	4.41817e-25	7.33165e-25	1.2115e-24	1.99355e-24	3.26681e-24	5.33128e-24	8.66489e-24	1.4026e-23	2.26131e-23	3.63124e-23
1693.93	9.88667e-34	1.86765e-33	3.51043e-33	6.56542e-33	1.22185e-32	2.2628e-32	4.17025e-32	7.6486e-32	1.39612e-31	2.53631e-31	4.58601e-31	8.2535e-31	1.47852e-30	2.63644e-30	4.67979e-30	8.2693e-30	1.45465e-29	2.5475e-29	4.4417e-29	7.71042e-29	1.33265e-28	2.29341e-28	3.92992e-28	6.70566e-28	1.13938e-27	1.92786e-27	3.2485e-27	5.45132e-27	9.11057e-27	1.51645e-26	2.51401e-26	4.15119e-26	6.82745e-26	1.11851e-25	1.82528e-25	2.96715e-25	4.80491e-25	7.75138e-25	1.24576e-24	1.99463e-24	3.18183e-24	5.05698e-24	8.00789e-24	1.26348e-23	1.98636e-23	3.11168e-23	4.8573e-23	7.55558e-23	1.17119e-22
1724.28	2.31652e-127	3.62817e-126	5.53913e-125	8.24517e-124	1.19692e-122	1.69487e-121	2.34163e-120	3.15723e-119	4.15527e-118	5.33945e-117	6.70028e-116	8.21269e-115	9.83485e-114	1.15089e-112	1.31637e-111	1.47195e-110	1.60941e-109	1.72104e-108	1.80035e-107	1.84269e-106	1.84572e-105	1.8096e-104	1.73696e-103	1.63259e-102	1.50287e-101	1.35524e-100	1.19739e-99	1.03673e-98	8.79811e-98	7.31959e-97	5.97086e-96	4.77662e-95	3.74814e-94	2.88536e-93	2.17947e-92	1.61564e-91	1.1756e-90	8.39778e-90	5.89034e-89	4.05749e-88	2.7453e-87	1.82477e-86	1.19176e-85	7.64885e-85	4.82508e-84	2.99215e-83	1.82432e-82	1.09377e-81	6.44949e-81
[truncated: 1,753 more columns]

## Sheet: cp  residual
cumulative probability residual of fitted GSD
ϕ	-3	-2.75	-2.5	-2.25	-2	-1.75	-1.5	-1.25	-1	-0.75	-0.5	-0.25	0	0.25	0.5	0.75	1	1.25	1.5	1.75	2	2.25	2.5	2.75	3	3.25	3.5	3.75	4	5	6	7	8
1140.93	-2.84693e-07	-3.64444e-06	-3.35287e-05	-0.00023138	-0.00124	-0.00537	-0.0192	-0.0582	-0.15279	-0.35397	-0.73543	-1.38987	-2.41873	-3.28418	-3.39445	-2.72723	-1.42293	0.05174	1.37956	2.31956	2.74187	2.63501	2.07929	1.2106	0.23383	-0.71227	-1.53021	-2.15614	-2.54795	-1.67818	0.48901	0.66639	-0.06433
1142.24	-0.0464	-0.10666	-0.13469	-0.01211	0.14455	1.07748	1.32378	0.97947	1.67443	2.29501	1.01272	-0.46521	-1.43347	-1.84502	-1.712	-1.15826	-0.37202	0.39112	0.97782	1.29016	1.29149	1.00652	0.50737	-0.09717	-0.65094	-1.05662	-1.26148	-1.25673	-1.06568	0.60465	1.86595	1.88093	1.29894
1143.83	-0.00106	-0.00351	-0.01023	-0.02668	-0.06293	-0.13576	-0.27028	-0.50083	-0.8702	-1.42731	-2.22335	-3.22371	-3.86831	-3.64958	-2.62505	-1.02801	0.73582	2.18406	3.06082	3.28406	2.92576	2.15862	1.19204	0.23093	-0.58863	-1.20947	-1.63221	-1.88985	-2.02098	-1.64768	-0.13892	1.02639	1.03097
1145.41	-0.000570977	-0.00217	-0.00713	-0.02053	-0.05254	-0.12121	-0.19171	-0.19967	-0.25286	-0.06548	-0.70418	-1.53176	-1.79553	-1.4942	-0.70007	0.35135	1.34584	1.98309	2.15407	1.87694	1.25921	0.45255	-0.38254	-1.08891	-1.56646	-1.76903	-1.70501	-1.42279	-0.98977	0.98303	2.13281	2.03333	1.231
1155.52	-2.26407e-07	-2.84749e-06	-2.59526e-05	-0.000178579	-0.000961482	-0.00418	-0.01507	-0.04615	-0.12258	-0.28757	-0.6053	-1.159	-2.04321	-3.12416	-3.59414	-3.14745	-1.87526	-0.26683	1.30547	2.51628	3.14617	3.11393	2.46766	1.36275	0.08507	-1.13742	-2.12389	-2.75558	-2.97869	-0.78637	1.34526	1.09785	0.2651
1160.2	-7.65974e-06	-6.58605e-05	-0.000426908	0.23864	1.06888	1.62719	1.95247	2.05154	2.58656	2.9263	2.3423	1.08481	-0.304	-1.2216	-1.54795	-1.32782	-0.67172	0.07393	0.69313	1.0359	1.0448	0.75797	0.28295	-0.23578	-0.63785	-0.84771	-0.85696	-0.70557	-0.45225	0.67708	1.43146	1.21572	0.51781
1172.02	-5.64273e-19	-4.65415e-16	-1.45933e-13	-1.99954e-11	-1.34881e-09	-4.96068e-08	-1.08553e-06	-1.52311e-05	-0.000146086	-0.00101	-0.0053	-0.02189	-0.07368	-0.20824	-0.50671	-0.77592	-0.61635	-0.27541	0.07038	0.30814	0.3898	0.31951	0.15036	-0.03489	-0.20144	-0.2906	-0.27245	-0.14635	0.06464	0.73936	0.28076	-0.42053	-0.93938
1174.75	-0.02063	-0.05302	0.2559	1.10456	1.52574	2.40192	2.62432	2.08185	2.09282	1.29838	0.08674	-0.7249	-1.02391	-0.79129	-0.18651	0.51438	0.99801	1.0847	0.77574	0.19125	-0.49527	-1.11949	-1.56239	-1.75438	-1.68863	-1.38732	-0.89591	-0.27098	0.43041	2.98521	3.9749	3.28739	2.09021
1177.42	-5.13677e-175	-2.48486e-141	-4.40151e-114	-4.84632e-92	-3.27768e-74	-8.68583e-60	-4.03761e-48	-1.10687e-38	-4.772e-31	-7.15347e-25	-7.0841e-20	-7.78901e-16	-1.44712e-12	-6.38112e-10	-8.79042e-08	0.00424	0.41113	1.03352	1.62714	2.02569	2.13589	1.90591	1.33	0.56531	-0.27176	-0.9495	-1.22334	-0.93045	-0.06948	3.58192	0.21052	-2.85234	-3.41935
1181.9	-8.28681e-10	-3.01864e-08	-6.62562e-07	-9.41095e-06	-9.19738e-05	-0.000651924	-0.00351	-0.01488	-0.05151	-0.1497	-0.37431	-0.82256	-1.61779	-2.89261	-3.99896	-4.23907	-3.40589	-1.87532	0.00436	1.81759	3.1772	3.81864	3.64194	2.70855	1.35015	-0.14974	-1.54805	-2.67347	-3.4316	-3.03576	-0.99237	-0.58725	-0.87203
1186.4	-8.44786e-15	-2.01847e-12	-2.14486e-10	-1.14272e-08	-3.38078e-07	-6.05933e-06	-7.08552e-05	-0.000575839	-0.00343	-0.01571	-0.05741	-0.1732	-0.44376	-0.98921	-1.95847	-2.60969	-2.67579	-2.35143	-1.69694	-0.78911	0.24871	1.24226	1.9929	2.3011	2.13963	1.56965	0.71638	-0.26848	-1.24194	-3.5152	-3.05343	-1.85097	-1.31922
1189.2	-2.60614e-06	-2.46276e-05	-0.000174337	-0.000959488	-0.00424	-0.01548	-0.04785	-0.1279	-0.30129	-0.63567	-1.21834	-2.14768	-3.32795	-4.0196	-3.8155	-2.80253	-1.18792	0.52179	1.99282	2.98536	3.37871	3.17269	2.46086	1.40096	0.2389	-0.85917	-1.78048	-2.46424	-2.88954	-2.41772	-0.60687	0.11865	-0.10579
1191.95	-1.59728e-55	-2.84629e-46	-1.57911e-38	-4.79955e-32	-1.28259e-26	-4.4777e-22	-2.84496e-18	-4.34179e-15	-2.00783e-12	-3.41748e-10	-2.51947e-08	-9.21978e-07	-1.8771e-05	-0.00023393	-0.00193	-0.00998	0.09489	0.3009	0.44757	0.46333	0.34754	0.14392	-0.06778	-0.16194	-0.21743	-0.23995	-0.23147	-0.17745	-0.04903	1.09009	0.88636	-0.95638	-2.05016
1194.94	-9.86639e-09	-2.08179e-07	-2.93391e-06	-2.91329e-05	-0.000213489	-0.0012	-0.00538	-0.01977	-0.06113	-0.16279	-0.38077	-0.79591	-1.50898	-2.62867	-4.02038	-4.62109	-4.05733	-2.66784	-0.77195	1.21698	2.87534	3.86796	4.01206	3.30061	2.04351	0.54221	-0.92436	-2.15237	-3.03194	-3.43387	-2.10928	-1.21893	-0.86872
1199.34	-3.63116e-07	-3.8624e-06	-3.08139e-05	-0.000190946	-0.000947765	-0.00387	-0.01332	-0.03946	-0.10238	-0.23657	-0.49369	-0.94204	-1.66167	-2.73549	-3.44288	-3.32543	-2.38744	-1.02585	0.45294	1.75223	2.63398	2.96002	2.70465	1.94761	0.91207	-0.21393	-1.2751	-2.15995	-2.79658	-2.48044	0.23356	1.28178	0.69392
1200.62	-5.82958e-12	-4.85784e-10	0.56205	1.9674	2.75774	3.25204	3.62023	3.78667	4.05415	4.24107	4.19201	3.92801	3.4023	2.47533	1.37444	0.50707	-0.02132	-0.36692	-0.5542	-0.59298	-0.51071	-0.36504	-0.23044	-0.18081	-0.20818	-0.25896	-0.26384	-0.16326	0.07175	1.51589	1.65213	0.77997	0.00992
1204.26	-0.000141634	-0.000708509	0.22565	1.17176	2.8	2.88337	2.89179	2.88935	3.0313	3.10924	2.38359	1.07137	-0.22407	-0.91108	-1.005	-0.70021	-0.26739	0.01573	0.10411	0.06706	0.00769	-0.0065	0.02628	0.04253	-0.00541	-0.14176	-0.35396	-0.59339	-0.78958	-0.16356	1.69673	2.1276	1.44053
1205.53	-3.38034e-12	-2.06434e-10	-7.30904e-09	-1.61281e-07	-2.36141e-06	-2.42237e-05	-0.000182505	-0.00105	-0.00481	-0.01796	-0.05636	-0.15193	-0.35915	-0.75747	-1.44708	-2.52647	-3.04927	-3.14201	-2.84362	-2.12847	-0.98374	0.44519	1.86913	2.89548	3.25879	2.87723	1.83518	0.34924	-1.29397	-4.78021	-2.77263	-1.01385	-0.62874
1210.12	-3.30772e-05	-0.000198821	-0.000963323	-0.00386	-0.0131	-0.03836	-0.09874	-0.18328	0.40752	0.4933	-0.0436	-0.8344	-1.20255	-1.02423	-0.38343	0.53277	1.46167	2.07872	2.22664	1.87005	1.09051	0.05814	-1.00943	-1.87385	-2.37872	-2.45371	-2.11678	-1.45184	-0.57626	2.76655	3.85446	3.0648	1.73839
1214.66	-4.98327e-08	-8.33316e-07	-9.62143e-06	-8.053e-05	-0.000509726	-0.00253	0.08605	0.29711	0.34943	0.33933	0.08532	-0.44425	-1.31453	-2.63038	-3.58844	-3.65336	-2.80094	-1.45012	0.08336	1.48816	2.5059	2.97462	2.84572	2.18052	1.22128	0.17028	-0.80961	-1.61487	-2.19856	-2.61484	-1.62136	-0.92832	-0.79591
1292.77	-0.00292	-0.00772	-0.01865	-0.0415	-0.08571	-0.16547	-0.30045	-0.51607	-0.84287	-1.31511	-1.96867	-2.83832	-3.42518	-3.03788	-1.77484	-0.03647	1.62022	2.73289	3.13395	2.87277	2.14159	1.18489	0.23053	-0.53612	-1.06088	-1.34662	-1.44436	-1.42307	-1.34399	-0.9613	-0.0766	1.31687	1.96582
1299.64	-1.66756e-07	-1.51889e-06	-1.08668e-05	-6.27004e-05	-0.000298705	-0.0012	-0.00414	-0.01248	-0.03332	-0.07995	-0.17432	-0.34904	-0.64781	-1.12373	-1.67021	-1.51771	-0.71161	0.23085	0.99564	1.41125	1.44558	1.16591	0.69246	0.17239	-0.30639	-0.68542	-0.94444	-1.08404	-1.10883	-0.21545	0.8809	0.90589	0.66314
1301	-6.04345e-63	-2.11092e-52	-1.36999e-43	-3.17836e-36	-4.5546e-30	-6.36778e-25	-1.27277e-20	-5.00531e-17	-5.05766e-14	-1.64134e-11	-2.06138e-09	-1.1709e-07	-3.42654e-06	-5.76044e-05	-0.000609313	0.0613	0.57121	1.25862	1.90115	2.33617	2.45505	2.20221	1.59831	0.79747	-0.10547	-0.92912	-1.49278	-1.65559	-1.35249	2.29268	2.34034	-0.43282	-1.95809
1302.34	-2.79148e-195	-6.05306e-159	-2.51655e-129	-3.50049e-105	-1.67563e-85	-1.84526e-69	-2.1996e-56	-1.00293e-45	-4.89473e-37	-5.91544e-30	-3.50734e-24	-1.78132e-19	-1.22059e-15	-1.63412e-12	-5.78064e-10	-6.91038e-08	-3.41165e-06	0.02106	0.16727	0.47168	0.84051	1.16533	1.3436	1.33387	1.07256	0.55585	-0.14115	-0.85887	-1.39248	0.32332	2.16421	-0.50376	-2.60901
1303.37	-8.12663e-11	-3.54373e-09	-9.26126e-08	-1.55485e-06	-1.78067e-05	-0.000146514	-0.000905838	-0.00437	-0.01706	-0.05534	-0.15301	-0.36856	-0.78798	-1.51974	-2.68128	-3.45499	-3.43812	-2.83759	-1.78533	-0.45872	0.91707	2.09224	2.83368	2.9573	2.51095	1.62035	0.46719	-0.75672	-1.88521	-3.87701	-2.72299	-1.38945	-0.85826
1315.05	-5.90888e-06	-5.4494e-05	-0.0003736	-0.00198	-0.00841	0.23748	1.25512	1.94227	2.28361	2.42759	1.7561	0.4395	-0.88435	-1.6467	-1.89376	-1.63235	-0.91084	-0.0358	0.78437	1.37145	1.61085	1.47307	1.00869	0.33465	-0.33531	-0.85782	-1.1522	-1.20695	-1.06412	0.05025	0.64555	0.56159	0.15395
1317.92	-3.61603e-19	-3.64666e-16	-1.33109e-13	-2.04183e-11	-1.49504e-09	-5.8251e-08	-1.32503e-06	-1.90444e-05	-0.000185021	-0.00129	-0.00673	-0.02762	-0.09206	-0.25715	-0.61762	-1.20712	-1.33863	-1.16695	-0.79709	-0.30149	0.22986	0.68592	0.95477	0.94674	0.65553	0.17797	-0.34502	-0.7692	-0.98591	0.03182	0.55335	-0.22951	-0.8497
1319.17	-0.00134	-0.00468	-0.01427	-0.03841	-0.09252	-0.20202	-0.40422	-0.68927	-0.09936	-0.69257	-1.74681	-2.80679	-3.15715	-2.81478	-1.84391	-0.45224	1.03423	2.23206	2.94274	3.09871	2.74655	2.00962	1.04176	-0.000390084	-0.96678	-1.7678	-2.34971	-2.6841	-2.75913	-0.88272	1.49436	1.85878	1.28453
1321.24	-4.7129e-05	-0.000224171	-0.000902326	-0.00313	-0.0095	-0.0256	-0.06205	-0.0875	0.71771	0.76046	0.44938	-0.14742	-1.00318	-2.16982	-3.07953	-3.09277	-2.15589	-0.73005	0.79559	2.05499	2.78511	2.87668	2.37291	1.44628	0.37302	-0.63774	-1.44543	-1.98678	-2.26163	-1.63313	-0.03586	1.19056	1.50475
1329.31	-4.41478e-11	-2.97943e-09	-1.07779e-07	-2.29195e-06	-3.09963e-05	-0.000285069	-0.00189	-0.00945	-0.03726	-0.11991	-0.3246	-0.75823	-1.21447	-1.41393	-1.48977	-1.52779	-1.48123	-1.36682	-1.06567	-0.49215	0.33012	1.24988	2.02482	2.36861	2.21654	1.60942	0.68217	-0.38969	-1.44233	-3.97822	-4.07625	-3.03352	-1.98854
1332.64	-4.48744e-09	-1.3084e-07	-2.36675e-06	-2.84171e-05	-0.000240002	-0.0015	-0.00722	-0.02785	-0.08872	-0.23989	-0.56347	-1.17282	-2.16353	-3.00146	-3.30586	-3.12109	-2.36784	-1.27096	0.000624821	1.23805	2.23154	2.8163	2.89707	2.44982	1.65378	0.66811	-0.36023	-1.32162	-2.1509	-3.99251	-3.87011	-2.68918	-1.68102
1333.17	-0.01734	0.46262	1.96894	2.13957	2.20795	2.28944	1.93527	1.11366	0.245	-0.53657	-1.61245	-2.0197	-1.77684	-1.00463	0.02077	0.96837	1.52981	1.62722	1.33204	0.79874	0.19562	-0.34326	-0.7379	-0.95869	-0.99554	-0.87066	-0.62413	-0.30549	0.03602	0.91361	0.99924	0.76129	0.41547
1338.07	-0.20194	0.28802	2.30772	3.01438	3.5031	3.32355	2.73325	1.77934	0.99257	0.00263	-2.03	-3.92149	-4.77556	-4.55315	-3.35173	-1.5055	0.49006	2.16565	3.28543	3.7798	3.7023	3.17423	2.33246	1.30607	0.2477	-0.75571	-1.64347	-2.37424	-2.91971	-3.08299	-1.24665	0.19476	0.55473
1349.45	-0.00382	-0.01382	-0.04247	0.02042	0.33144	0.55468	0.47044	0.04689	-0.44015	-0.74293	-1.71588	-2.17584	-1.94609	-1.0719	0.15947	1.33715	2.04396	2.13386	1.68721	0.92796	0.12382	-0.50433	-0.8379	-0.87992	-0.72489	-0.48994	-0.28015	-0.16176	-0.154	-0.66413	-0.62778	-0.31828	-0.18276
1353.21	-7.47258e-12	-9.30497e-10	-5.36436e-08	-1.61906e-06	-2.8367e-05	-0.00031468	-0.00238	-0.01301	-0.05425	-0.18017	-0.49399	-1.15305	-2.35079	-3.50027	-3.92565	-3.56578	-2.3912	-0.80461	0.89496	2.38637	3.38551	3.70962	3.30402	2.23976	0.86198	-0.56484	-1.83395	-2.82847	-3.51971	-4.30559	-3.70953	-2.50787	-1.56899
1354.39	-2.14495e-09	-1.19937e-07	-3.46928e-06	-5.78315e-05	-0.000608044	-0.00435	-0.02253	-0.05274	0.4536	0.26178	-0.52703	-1.45058	-1.81716	-1.73498	-1.26315	-0.51325	0.35374	1.04748	1.44934	1.5165	1.27708	0.8164	0.2463	-0.32351	-0.73873	-0.95331	-0.98401	-0.89191	-0.75356	-0.72938	-0.96843	-0.86626	-0.71247
1355.05	-3.28008e-09	-1.12926e-07	-2.3142e-06	-3.04604e-05	-0.000274778	-0.0018	0.26802	0.98784	1.48554	2.02027	1.82235	1.06539	0.06328	-0.65607	-0.91401	-0.77893	-0.34395	0.08008	0.3555	0.43239	0.33811	0.14748	-0.05308	-0.19704	-0.22371	-0.13313	0.0317	0.20707	0.33473	0.00302	-0.35899	-0.42253	-0.50108
1358.92	-8.22972e-06	-0.000104937	0.28191	1.09531	1.85833	2.89391	3.49047	3.59163	4.20234	3.73946	1.97646	-0.08802	-1.52465	-2.27064	-2.27174	-1.62474	-0.58818	0.41661	1.14065	1.45433	1.35899	0.96263	0.42334	-0.10128	-0.44684	-0.57965	-0.53672	-0.39446	-0.23204	-0.07928	0.04214	0.27897	0.38958
1364.75	-1.15224e-11	-1.27774e-09	-6.7321e-08	-1.89559e-06	-3.14944e-05	-0.000335603	-0.00246	0.06251	1.47295	1.49414	1.23026	0.59133	-0.56791	-2.02948	-2.91194	-2.91681	-2.08118	-0.87964	0.38129	1.44471	2.1379	2.38654	2.19638	1.61909	0.85704	0.0372	-0.75057	-1.45503	-2.05337	-3.38818	-3.13871	-2.27966	-1.6276
1378.37	-2.68668e-14	-8.22248e-12	-1.00913e-09	-5.74652e-08	-1.71638e-06	-2.98066e-05	-0.000328172	-0.00246	-0.01341	-0.05566	-0.18412	-0.50316	-1.17116	-2.32351	-3.16203	-3.35376	-2.80116	-1.77404	-0.45769	0.9085	2.06504	2.78914	2.93635	2.4526	1.55673	0.45176	-0.67148	-1.67333	-2.47907	-3.94423	-3.82048	-2.97499	-2.14193
1380.1	-0.00224	0.18555	1.17484	2.30042	2.99092	4.28401	4.6435	3.70893	2.84129	1.28628	-1.25162	-3.07812	-3.8632	-3.546	-2.31834	-0.60192	1.05204	2.25281	2.84652	2.85334	2.40898	1.69605	0.88113	0.084	-0.58277	-1.10115	-1.4881	-1.77544	-1.99257	-2.38499	-2.00849	-1.43982	-1.01862
1380.8	-5.30245e-122	-1.27048e-93	-8.9159e-72	-5.84934e-55	-5.15927e-42	-4.76283e-32	-2.23366e-24	-1.79547e-18	-6.30815e-14	-1.99134e-10	-9.83607e-08	-1.16515e-05	-0.000459815	-0.00779	-0.06874	-0.36754	-1.10829	-1.23979	-1.16412	-1.04816	-0.73092	-0.10899	0.72548	1.40092	1.65072	1.36837	0.59927	-0.48869	-1.6743	-4.52507	-4.24126	-3.16487	-2.07825
1381.7	-2.3542e-27	-3.53184e-22	-6.14152e-18	-1.8276e-14	-1.28067e-11	-2.74471e-09	-2.22887e-07	-8.17349e-06	-0.000156275	-0.00175	-0.0127	-0.06429	-0.2428	-0.72112	-1.75912	-2.43382	-2.45496	-2.09757	-1.39255	-0.42107	0.65779	1.6246	2.24424	2.29332	1.83774	1.00412	-0.03213	-1.09815	-2.06101	-4.14198	-4.16006	-3.29766	-2.34769
1382.31	-1.47066e-39	-8.00876e-32	-1.49266e-25	-1.80458e-20	-2.37622e-16	-5.18706e-13	-2.63844e-10	-4.12116e-08	-2.47219e-06	-6.82773e-05	-0.00101	-0.0089	-0.05208	-0.21815	-0.69654	-1.69083	-2.02874	-1.99902	-1.71452	-1.15536	-0.33873	0.61767	1.50152	2.01121	2.03256	1.56495	0.70584	-0.38373	-1.52541	-4.44504	-4.4713	-3.52905	-2.47456
1383.5	-8.26911e-103	-7.4752e-81	-1.57813e-63	-7.38015e-50	-4.51152e-39	-1.46293e-30	0.12654	0.45744	0.6856	0.95181	1.0284	1.02845	1.02841	1.0269	1.32864	2.0044	2.8312	3.39928	3.34585	2.49553	0.98965	-0.73448	-2.08496	-2.53138	-2.07503	-0.87905	0.67461	2.13718	3.14331	1.31181	-1.18996	-1.45908	-1.42232
1386.72	-5.6147e-22	-1.9781e-18	-2.00485e-15	-7.06921e-13	-1.01875e-10	-6.87785e-09	-2.4421e-07	-5.03004e-06	-6.53065e-05	-0.000573446	-0.00361	-0.01721	-0.06456	-0.19797	-0.51169	-0.76082	-0.63942	-0.37466	-0.10496	0.09375	0.19323	0.19242	0.11444	0.00874	-0.09787	-0.13828	-0.07333	0.09528	0.32746	0.53765	-0.35217	-0.80816	-1.04985
1431.23	-5.33751e-68	-1.07443e-56	-3.09362e-47	-2.54801e-39	-1.07214e-32	-3.74455e-27	-1.62938e-22	-1.24085e-18	-2.19788e-15	-1.14878e-12	-2.16229e-10	-1.73145e-08	-6.78103e-07	-1.45967e-05	-0.000190417	0.00409	0.54093	1.31708	2.01111	2.39194	2.34087	1.8517	1.03759	0.17842	-0.56177	-1.01206	-1.08309	-0.78232	-0.20175	1.86903	1.05763	-0.66583	-1.91161
1436.46	-2.6053e-21	-3.98321e-17	-1.02172e-13	-6.12057e-11	-1.12111e-08	-7.82064e-07	-2.4846e-05	0.01563	0.31984	0.32513	0.23694	-0.06576	-0.81064	-1.87947	-2.46997	-2.38355	-1.59808	-0.5418	0.5264	1.37832	1.86116	1.92453	1.60202	0.96636	0.25172	-0.4254	-1.00835	-1.4906	-1.89244	-3.08776	-3.22577	-2.59273	-1.88143
1451.78	-1.1367e-47	-3.55117e-37	-6.23451e-29	-1.86831e-22	-2.28751e-17	-2.27152e-13	-3.13501e-10	-9.18108e-08	-7.95508e-06	-0.000264789	-0.00416	-0.03616	-0.19778	-0.55552	-0.56216	-0.30437	0.00507	0.09476	0.03215	-0.04172	-0.02699	0.0864	0.22291	0.2342	0.17437	0.06285	-0.07229	-0.2055	-0.31985	-0.64701	-0.64169	-0.33251	0.03294
1452.92	-2.74439e-15	-4.5822e-12	-1.80563e-09	-2.22395e-07	-1.07361e-05	-0.000243746	0.24295	0.96323	1.6499	2.06545	1.48534	0.46103	-0.1269	-0.47499	-0.58801	-0.44829	-0.11125	0.16882	0.31868	0.33134	0.24934	0.13193	0.01482	-0.11318	-0.17051	-0.16519	-0.1208	-0.06528	-0.02033	-0.06798	-0.03619	0.09089	0.22571
1453.53	-2.37839e-19	-2.56558e-15	-4.50263e-12	-1.83374e-09	-2.30599e-07	-1.12674e-05	-0.000257346	-0.00319	-0.02414	-0.12306	-0.45619	-0.98064	-1.15184	-0.98233	-0.66044	-0.28273	0.12917	0.40259	0.55592	0.61882	0.60528	0.51348	0.3277	0.0197	-0.27917	-0.52347	-0.69371	-0.79564	-0.84892	-0.9212	-0.60593	-0.17955	0.10873
1454.45	-3.08226e-15	-2.56854e-12	-6.51347e-10	-6.20367e-08	-2.63893e-06	-5.78199e-05	-0.000733779	-0.00594	-0.03322	-0.13703	-0.43985	-1.1487	-1.9318	-2.20706	-1.99431	-1.37355	-0.45952	0.3813	1.00884	1.36759	1.46646	1.3494	1.05926	0.60812	0.11498	-0.38034	-0.85874	-1.31265	-1.73502	-2.85743	-2.58017	-1.82	-1.26331
1455.12	-3.55104e-42	-2.82116e-33	-3.36853e-26	-1.42831e-20	-4.26101e-16	-1.54036e-12	-1.03968e-09	-1.84774e-07	-1.13645e-05	-0.000300627	-0.00407	0.12384	0.58235	1.171	1.61697	1.62599	1.16303	0.29161	-0.64237	-1.25855	-1.32854	-0.86498	-0.09797	0.58043	0.991	1.06206	0.83407	0.41702	-0.06131	-1.24395	-1.19053	-0.72037	-0.17771
1457.82	-1.26206e-11	-2.59236e-09	-2.04969e-07	-7.40277e-06	-0.000140547	-0.00157	0.06229	0.22831	0.26782	0.08019	-0.78252	-1.84921	-2.2156	-2.00799	-1.29287	-0.23901	0.86918	1.6495	1.9646	1.81234	1.29492	0.57115	-0.19964	-0.89213	-1.35486	-1.5574	-1.52616	-1.32409	-1.02678	-0.07626	0.16424	0.25636	0.35245
1458.76	-4.53072e-23	-4.23536e-18	-3.82516e-14	-5.37886e-11	-1.72162e-08	-1.69685e-06	0.07365	0.2853	0.47695	0.66584	0.48418	-0.17617	-0.83027	-1.0506	-1.0871	-0.95858	-0.55081	-0.05132	0.49299	0.99384	1.33916	1.43192	1.20608	0.62712	-0.0897	-0.82383	-1.47616	-1.98421	-2.3227	-2.3256	-1.36778	-0.52259	-0.01337
1460.52	-9.17916e-70	-3.91063e-57	-9.46996e-47	-3.26812e-38	-3.42229e-31	-2.02429e-25	-1.12733e-20	-8.997e-17	-1.45349e-13	-6.31442e-11	-9.31681e-09	-5.65711e-07	-1.65528e-05	-0.000265744	-0.0026	0.53103	1.46021	2.36209	2.90218	2.83847	2.09349	0.80613	-0.65331	-1.70126	-2.08722	-1.67377	-0.57831	0.88341	2.31684	2.73216	-0.96802	-2.4689	-2.76086
1470.04	-6.34005e-20	-1.33395e-15	-3.686e-12	-2.02366e-09	-3.06914e-07	-1.6716e-05	0.2163	0.8473	1.44492	1.73193	1.36652	0.42223	-0.40527	-0.84417	-0.98829	-0.80875	-0.29765	0.2483	0.69641	0.94655	0.95876	0.75894	0.40344	-0.05956	-0.4567	-0.74217	-0.91027	-0.98354	-0.99581	-0.93932	-0.65057	-0.2215	0.08658
1470.53	-9.45848e-17	-1.1693e-13	-4.26155e-11	-5.64616e-09	-3.23498e-07	-9.25506e-06	-0.000148942	-0.00149	-0.01002	-0.04863	-0.17999	-0.53226	-1.30681	-2.67635	-3.67336	-3.87608	-3.15757	-1.79998	-0.05682	1.69856	3.0697	3.75453	3.60832	2.65054	1.25931	-0.26384	-1.67676	-2.83717	-3.69994	-4.99741	-4.43827	-3.18205	-2.17911
1471.35	-0.000741824	0.79465	3.22195	3.56537	3.76042	4.22179	4.35047	4.05748	3.72171	3.20187	1.45647	-0.34301	-1.53655	-2.07022	-1.96171	-1.38343	-0.60896	0.04587	0.4448	0.56542	0.47165	0.26805	0.05242	-0.11179	-0.15854	-0.08465	0.08392	0.30583	0.53907	1.05277	1.03023	0.67973	0.24343
1473.53	-7.5048e-56	-8.80642e-43	-1.05711e-32	-6.272e-25	-6.19806e-19	-2.60347e-14	0.21564	0.79322	1.22979	1.39319	1.43502	1.38804	1.14472	0.36526	-0.18807	-0.43808	-0.47326	-0.46508	-0.31386	0.01031	0.41572	0.74209	0.83029	0.56001	0.15189	-0.26843	-0.60971	-0.83595	-0.95851	-1.14925	-0.98797	-0.45626	-0.00834
1474.03	-2.53724e-08	-1.16362e-06	0.27978	1.22776	2.48261	2.98812	3.30286	3.30845	3.26712	3.15677	1.67538	-0.23521	-1.5257	-2.15693	-2.06542	-1.33943	-0.23777	0.81262	1.56691	1.88979	1.76707	1.28837	0.59586	-0.16005	-0.7738	-1.1758	-1.36421	-1.38435	-1.29943	-0.80132	-0.25405	0.12817	0.28834
1474.6	-1.61385e-08	-6.81337e-07	-1.54535e-05	-0.000208763	-0.00183	0.24086	1.07936	1.53222	2.10608	2.05156	1.18851	0.50573	0.04562	-0.22886	-0.33494	-0.32755	-0.2495	-0.20617	-0.18416	-0.15737	-0.10854	-0.03687	0.03607	0.06285	0.09602	0.1411	0.19631	0.25339	0.30301	0.31862	0.37981	0.43128	0.44475
1475.74	-8.46988e-16	-9.82752e-13	-3.21292e-10	-3.71529e-08	-1.83124e-06	-4.48371e-05	0.24563	0.98418	1.74776	2.07378	1.89368	1.17322	0.30948	-0.18345	-0.40415	-0.37234	-0.07088	0.22705	0.40714	0.40002	0.20174	-0.12263	-0.46717	-0.72506	-0.74895	-0.51545	-0.0806	0.44747	0.94935	1.37803	0.75065	0.51753	0.43926
1476.37	-4.5609e-11	0.30209	1.28953	1.53733	1.53715	1.8218	1.99843	2.09808	2.45362	2.34356	1.52515	0.53487	-0.10461	-0.50424	-0.66574	-0.58503	-0.279	0.05263	0.32288	0.45972	0.42598	0.23652	-0.05098	-0.35613	-0.51043	-0.46213	-0.22924	0.11528	0.47613	0.85078	0.45796	0.38962	0.39728
1476.88	-3.17176e-11	-4.21314e-09	-2.43893e-07	-7.08532e-06	-0.000116133	-0.00118	-0.00813	-0.04027	-0.15196	-0.45762	-1.14272	-2.2951	-3.23502	-3.36413	-2.73116	-1.46293	0.15592	1.58749	2.54374	2.88799	2.63847	1.93347	0.96502	-0.07729	-0.96743	-1.62576	-2.05011	-2.28856	-2.40521	-2.45816	-1.89868	-1.28858	-0.9626
1481.91	-8.1564e-22	-1.07727e-18	-5.38661e-16	-1.16276e-13	-1.21383e-11	-6.76029e-10	-2.18674e-08	-4.42127e-07	-5.9539e-06	-5.64179e-05	-0.00039448	-0.00212	-0.00908	-0.03195	-0.09484	-0.23936	-0.1782	-0.01975	0.07833	0.06187	-0.04146	-0.1664	-0.24069	-0.19363	-0.10252	0.00322	0.0933	0.15174	0.18311	0.30696	0.25811	-0.38042	-0.86831
1484.34	-3.23573e-09	-1.40142e-07	-3.37158e-06	-4.93855e-05	-0.000475872	-0.00322	0.32287	1.05867	1.17337	1.19176	0.62451	-0.30741	-0.93313	-1.08238	-0.832	-0.3144	0.28778	0.68698	0.807	0.67481	0.38342	0.04616	-0.24502	-0.4475	-0.51114	-0.44643	-0.29	-0.08844	0.11638	0.45768	0.25456	-0.09568	-0.34263
1484.87	-1.42649e-31	-2.02141e-25	-2.01837e-20	-2.33381e-16	-4.67943e-13	-2.25889e-10	-3.4276e-08	-2.03052e-06	-5.60077e-05	-0.000830009	-0.00742	-0.04405	-0.18729	-0.60718	-1.57928	-2.52555	-2.75017	-2.50804	-1.7995	-0.67698	0.66444	1.91573	2.7342	2.80692	2.21716	1.13982	-0.1832	-1.51929	-2.69749	-5.06146	-5.03736	-3.94071	-2.66841
1486.28	-1.45627e-36	-2.75067e-28	-8.0417e-22	-9.05609e-17	-8.00898e-13	-9.70395e-10	-2.48817e-07	-1.89626e-05	-0.000560082	-0.00789	-0.0623	-0.31305	-0.91907	-1.26797	-1.16513	-0.85597	-0.34306	0.09335	0.44601	0.71436	0.87636	0.89805	0.7366	0.33677	-0.12837	-0.58967	-0.99653	-1.32264	-1.56257	-1.91334	-1.53807	-0.83484	-0.21123
1489.91	-7.13285e-30	-6.39673e-25	-9.35656e-21	-2.97828e-17	-2.62919e-14	-7.89318e-12	-9.56625e-10	-5.4067e-08	-1.60881e-06	-2.79101e-05	-0.000307583	-0.00231	-0.01263	-0.05266	-0.17489	-0.47723	-0.77307	-0.73286	-0.54564	-0.35341	-0.21566	-0.12637	-0.05189	0.04894	0.13053	0.20962	0.29481	0.38694	0.47984	0.32568	-0.69528	-1.51299	-1.84325
1496.47	-6.43015e-11	-1.52599e-08	-1.24766e-06	-4.32531e-05	-0.000751477	0.46176	2.15569	3.17793	4.01379	3.59185	1.95747	0.31986	-1.09612	-2.08088	-2.32624	-1.73925	-0.52202	0.80596	1.86094	2.38287	2.2938	1.68831	0.76013	-0.26489	-1.10735	-1.67215	-1.95582	-2.01703	-1.93799	-1.37489	-0.77806	-0.25093	0.07189
1499.68	-1.52183e-07	-6.07023e-06	-0.000123997	-0.00146	-0.01105	0.45934	2.10981	2.54003	2.21989	1.58019	-0.37153	-1.87511	-2.63007	-2.49752	-1.51733	-0.00944	1.47787	2.48518	2.8198	2.5016	1.70734	0.68353	-0.3426	-1.21024	-1.79873	-2.11668	-2.22273	-2.19294	-2.09373	-1.56807	-0.81527	-0.23378	0.08147
1504.4	-5.03179e-14	-3.06795e-11	-5.82007e-09	-4.24886e-07	-1.42032e-05	-0.000250627	-0.00262	0.02813	0.84285	1.23098	0.82854	-0.23409	-1.22006	-1.66157	-1.63448	-1.15201	-0.27643	0.61619	1.31308	1.66113	1.60189	1.18157	0.51802	-0.24164	-0.85926	-1.24328	-1.38338	-1.33092	-1.16563	-0.63038	-0.38048	-0.07085	0.1641
1508.39	0	0	0	-6.84967e-255	-6.38501e-181	-2.6024e-128	-6.82287e-91	-2.80313e-64	-2.37908e-45	-6.90785e-32	-2.59864e-22	-1.67949e-15	-1.1723e-10	-3.26738e-07	-9.216e-05	-0.0051	-0.08849	-0.10866	0.71313	1.08949	0.52684	-0.44542	-1.01744	-0.86774	-0.224	0.52711	1.00046	1.00258	0.56837	-1.70981	-1.33344	-0.74007	-0.18841
1513.74	-1.80771e-16	-4.4972e-14	-5.31189e-12	-3.29408e-10	-1.16998e-08	-2.56608e-07	-3.70913e-06	-3.73801e-05	-0.000275756	-0.00155	-0.00693	-0.02525	-0.07727	-0.20334	-0.46956	-0.86796	-0.73575	-0.29088	0.25578	0.72289	0.97483	0.93615	0.60918	0.09675	-0.46296	-0.89555	-1.06399	-0.90305	-0.43256	1.91632	1.11101	-0.40291	-0.88026
1536.27	-2.04426e-28	-2.36247e-24	-7.58963e-21	-8.07575e-18	-3.31072e-15	-5.95834e-13	-5.26885e-11	-2.52306e-09	-7.11559e-08	-1.27067e-06	-1.5295e-05	-0.00013098	-0.000836046	-0.00414	-0.01648	0.15839	0.84004	1.76523	2.64684	3.23966	3.38165	3.01141	2.17866	1.07692	-0.09724	-1.13065	-1.86775	-2.23908	-2.25653	-0.2683	2.14902	2.31681	0.77002
1581.26	-1.19014e-137	-2.6813e-104	-5.94044e-79	-1.08241e-59	-4.68724e-45	-6.21625e-34	-1.76133e-25	-4.66592e-19	-3.54802e-14	-1.81635e-10	-1.1965e-07	-1.65926e-05	-0.000704151	-0.01215	-0.10583	-0.53267	-0.31878	-0.07236	-0.23876	-0.63667	-0.85704	-0.57778	0.20032	1.04289	1.55602	1.49424	0.81899	-0.31246	-1.63116	-4.63822	-3.95121	-2.95069	-1.96113
1584.34	-6.81909e-106	-6.0666e-84	-1.72442e-66	-1.30488e-52	-1.41869e-41	-8.46852e-33	-8.05917e-26	-2.85416e-20	-7.38093e-16	-2.38217e-12	-1.46949e-09	-2.43159e-07	-1.41314e-05	-0.000357378	-0.00466	-0.03596	-0.18249	-0.5021	-0.64399	-0.68141	-0.78372	-0.83587	-0.6833	-0.23762	0.28606	0.76351	1.07004	1.13119	0.94217	-1.36492	-3.22049	-3.46276	-2.80899
1591.04	-3.89587e-69	-1.10864e-52	-4.50558e-40	-2.07054e-30	-5.25284e-23	-2.47953e-17	-5.52557e-13	-1.18655e-09	-4.24179e-07	-3.83824e-05	-0.00121	-0.01708	-0.12968	-0.61318	-1.07029	-1.14	-0.94865	-0.76445	-0.44379	0.11221	0.82065	1.43904	1.66959	1.25782	0.44788	-0.53808	-1.46509	-2.15964	-2.54522	-2.10117	-1.35687	-0.67929	-0.11246
1597.72	-6.1962e-56	-5.88993e-45	-4.37985e-36	-6.46291e-29	-4.01512e-23	-1.92868e-18	-1.17071e-14	-1.33553e-11	-3.94635e-09	-3.91425e-07	-1.6069e-05	-0.000323396	-0.00366	-0.02598	-0.12668	-0.4557	-1.10633	-1.16864	-0.97443	-0.71119	-0.41371	-0.08002	0.27033	0.55791	0.69197	0.67369	0.52849	0.29752	0.02496	-1.22481	-2.22768	-2.4764	-2.11773
1598.72	-3.30427e-84	-6.16817e-61	-5.3209e-44	-1.12526e-31	-1.04984e-22	-3.5405e-16	-1.99461e-11	-5.71883e-08	-1.8772e-05	-0.00127	-0.02738	-0.25543	-0.43992	-0.19532	-0.14662	-0.37147	-0.41619	-0.25695	0.17921	0.71169	1.06453	1.04592	0.60892	-0.15727	-0.87728	-1.39785	-1.65957	-1.68979	-1.56691	-0.96692	-0.56597	-0.13117	0.01666
1600.55	-1.01299e-102	-3.09136e-75	-5.13853e-55	-3.86748e-40	-3.40646e-29	-3.84213e-21	-3.22638e-15	-7.36506e-11	-1.18507e-07	-2.70927e-05	-0.00147	-0.02789	-0.24257	-0.96659	-1.32405	-1.37461	-1.0946	-0.64931	0.10893	1.07766	1.90717	2.21241	1.75416	0.52947	-0.90656	-2.20046	-3.11004	-3.55138	-3.5793	-2.29781	-1.41459	-0.61768	-0.09291
1607.14	-7.81152e-31	-8.53974e-25	-6.82964e-20	-6.53443e-16	-1.11509e-12	-4.69376e-10	-6.34122e-08	-3.40481e-06	-8.64273e-05	-0.00119	-0.01007	-0.05685	-0.23178	-0.72553	-1.8324	-2.54963	-2.57988	-2.20146	-1.4057	-0.29033	0.93766	1.99645	2.59946	2.50343	1.83607	0.7772	-0.45303	-1.65598	-2.69139	-4.57341	-4.19987	-3.19039	-2.26477
1607.83	-1.81746e-46	-1.61775e-36	-1.2157e-28	-2.08616e-22	-1.79702e-17	-1.44954e-13	-1.79361e-10	-5.03188e-08	-4.36065e-06	-0.000149114	-0.00244	-0.02234	-0.1288	-0.51549	-0.78218	-0.73288	-0.55199	-0.54481	-0.597	-0.50986	-0.15643	0.42712	1.04087	1.35333	1.28979	0.84563	0.11095	-0.76995	-1.64561	-3.50054	-3.14635	-2.3726	-1.63718
1618.76	-1.48982e-184	-1.02222e-143	-7.44636e-112	-5.40029e-87	-1.34795e-67	-1.83773e-52	-1.183e-40	-1.93491e-31	-2.98941e-24	-1.21537e-18	-2.89198e-14	-7.51498e-11	-3.46941e-08	-4.1599e-06	-0.000174212	-0.00321	-0.03119	-0.15539	-0.17488	0.14766	0.25843	-0.03029	-0.50416	-0.75313	-0.69256	-0.2504	0.45514	1.18807	1.70479	-0.2233	-2.97593	-3.2523	-2.68075
1621.86	-3.7452e-17	-1.02815e-13	-6.44111e-11	-1.21321e-08	-8.59756e-07	-2.75109e-05	-0.000461063	-0.00457	-0.02948	-0.13439	-0.46156	-1.22638	-2.00699	-2.27445	-2.14455	-1.6644	-0.86469	-0.02257	0.78487	1.49222	2.01883	2.27108	2.15092	1.56469	0.67835	-0.39034	-1.51204	-2.57285	-3.49115	-5.32678	-4.99335	-3.72836	-2.39858
1622.29	-3.29548e-37	-2.12738e-29	-3.57068e-23	-3.26823e-18	-2.94393e-14	-4.17786e-11	-1.35918e-08	-1.36687e-06	-5.39235e-05	-0.00101	-0.01042	-0.06699	-0.29525	-0.88191	-1.19008	-1.14865	-0.883	-0.62312	-0.33167	0.04798	0.50544	0.94354	1.20684	1.11069	0.744	0.1926	-0.43538	-1.04211	-1.55953	-2.54767	-2.40382	-1.84749	-1.26596
1625.65	-1.02652e-06	-1.82155e-05	-0.000206164	-0.0016	-0.00898	-0.03854	-0.13176	-0.30559	0.44134	0.38811	0.07465	0.16703	0.48058	0.86325	1.09292	0.99293	0.51537	-0.20582	-0.92746	-1.42449	-1.57143	-1.36615	-0.90798	-0.36525	0.17717	0.65118	1.02227	1.28314	1.44538	1.46812	1.27789	1.01083	0.79772
1627.05	-2.33582e-44	-2.6675e-34	-1.84909e-26	-2.39665e-20	-1.39625e-15	-7.24413e-12	-5.70401e-09	-1.03282e-06	-5.94586e-05	-0.0014	-0.01645	-0.11225	-0.50161	-0.69121	-0.49587	-0.3461	-0.21093	-0.19527	-0.146	0.04086	0.34628	0.65003	0.78613	0.58864	0.2139	-0.23216	-0.64312	-0.94697	-1.11903	-1.10938	-0.84356	-0.3808	0.02976
1628.85	-5.90252e-25	-1.22617e-20	-4.95868e-17	-5.11055e-14	-1.68107e-11	-2.12993e-09	-1.21621e-07	-3.56857e-06	-6.00368e-05	-0.000634664	-0.00455	-0.02359	-0.0933	-0.29421	-0.76796	-1.70007	-2.15356	-2.24595	-2.05518	-1.54736	-0.74591	0.22965	1.17593	1.8248	2.02849	1.78085	1.17468	0.36137	-0.49999	-2.92302	-3.82781	-3.56884	-2.6312
1638.46	-1.67766e-10	-1.81816e-08	-8.76797e-07	-2.16408e-05	-0.000306922	-0.00275	-0.0169	-0.07581	-0.26238	-0.73278	-1.7137	-2.87755	-3.27579	-2.90101	-1.77533	-0.18296	1.41047	2.48516	2.84988	2.53422	1.73001	0.69897	-0.31946	-1.15988	-1.69903	-1.93967	-1.93966	-1.77916	-1.5334	-0.57727	0.06529	0.32082	0.40182
1643.06	-1.36398e-76	-7.23749e-61	-2.56312e-48	-2.65251e-38	-2.60646e-30	-6.22861e-24	-7.66714e-19	-8.84926e-15	-1.54458e-11	-5.97054e-09	-6.93004e-07	-3.07956e-05	-0.000636035	-0.00713	0.16889	0.71729	1.46	1.98297	1.98183	1.3506	0.24249	-0.98135	-1.86709	-2.02108	-1.4518	-0.28946	1.14206	2.43564	3.2332	-0.00975	-3.50366	-3.3192	-2.47315
1646.6	-5.24944e-18	-4.87732e-15	-1.58244e-12	-2.10809e-10	-1.32246e-08	-4.38693e-07	-8.48828e-06	-0.000104088	-0.000867763	-0.00522	-0.02382	-0.08603	-0.255	-0.63943	-0.8563	-0.72093	-0.37391	-0.10885	-0.029	-0.13771	-0.36492	-0.59526	-0.69111	-0.52416	-0.08744	0.56729	1.29019	1.87827	2.14511	-0.65632	-3.31053	-3.38525	-2.83649
1649	-4.05775e-32	-1.21044e-26	-4.57108e-22	-3.06669e-18	-4.85212e-15	-2.29438e-12	-3.95249e-10	-2.92714e-08	-1.07027e-06	-2.1691e-05	-0.00026842	-0.0022	-0.01276	-0.0555	-0.18972	-0.1991	0.01077	0.16525	0.13028	-0.09374	-0.40577	-0.67005	-0.76256	-0.60078	-0.27188	0.18287	0.69298	1.17205	1.53327	0.61919	-1.88685	-2.75532	-2.40986
1650.18	-5.50164e-44	-1.07954e-34	-2.61808e-27	-1.93411e-21	-8.91359e-17	-4.52994e-13	-3.99212e-10	-8.74219e-08	-6.33139e-06	-0.000190329	-0.00284	-0.0244	-0.13464	-0.52313	-0.62282	-0.41139	-0.13554	-0.06372	-0.13794	-0.20178	-0.13231	0.0839	0.34843	0.47267	0.4586	0.32522	0.11745	-0.11799	-0.34832	-1.227	-1.76808	-1.6835	-1.29533
1652.81	-1.10368e-53	-2.36951e-41	-8.69649e-32	-2.27936e-24	-1.29317e-18	-3.75312e-14	-1.08577e-10	-5.25286e-08	-6.34808e-06	-0.00026161	-0.00468	-0.04383	-0.24852	-0.95459	-1.46985	-1.61391	-1.47957	-1.19622	-0.6243	0.26283	1.28869	2.13186	2.44301	1.94209	0.88699	-0.46668	-1.83294	-2.98041	-3.77945	-4.08087	-3.18244	-2.25521	-1.45319
1659.07	-1.47905e-46	-2.35694e-37	-6.37093e-30	-6.40013e-24	-4.50203e-19	-3.6986e-15	-5.36416e-12	-1.91738e-09	-2.2115e-07	-1.02316e-05	-0.000226367	-0.00276	-0.0208	-0.10629	-0.3968	-1.14098	-1.73688	-1.88252	-1.78786	-1.45314	-0.79873	0.12937	1.13294	1.85763	2.08421	1.76083	0.97365	-0.09679	-1.24203	-4.21096	-4.58393	-3.88752	-2.83741
1659.75	-2.23087e-145	-4.93747e-111	-9.88795e-85	-1.37091e-64	-3.6457e-49	-2.36675e-37	-2.63103e-28	-2.22628e-21	-4.49428e-16	-5.19179e-12	-6.70689e-09	-1.61844e-06	-0.000108065	-0.0027	-0.0317	-0.20915	-0.76785	-1.17628	-1.14488	-1.0329	-0.79532	-0.28827	0.47492	1.18203	1.53572	1.38808	0.73687	-0.27997	-1.4448	-4.37137	-4.21118	-3.37632	-2.32651
1660.05	-1.05451e-10	-6.44826e-09	-2.13497e-07	-4.19406e-06	-5.28431e-05	-0.000456269	-0.00286	-0.0136	-0.05132	-0.15883	-0.41537	-0.94113	-1.88749	-3.31049	-4.26218	-4.31834	-3.42049	-1.95026	-0.19687	1.51893	2.89488	3.70128	3.80848	3.19024	2.09978	0.76282	-0.61066	-1.86578	-2.9167	-5.13905	-5.31121	-4.27363	-3.01024
1666.32	-7.30061e-15	-2.5589e-12	-3.56005e-10	-2.27433e-08	-7.54301e-07	-1.44022e-05	-0.000172711	-0.0014	-0.00816	-0.036	-0.1257	-0.36037	-0.81192	-1.01528	-0.71774	-0.08997	0.68293	1.21805	1.3389	1.00514	0.3097	-0.55233	-1.32971	-1.75601	-1.6742	-1.05323	-0.01391	1.20587	2.32364	2.38671	-0.37578	-1.1547	-1.25078
1670.41	-5.61716e-44	-1.56444e-36	-2.59619e-30	-4.08292e-25	-8.96663e-21	-3.80168e-17	-4.0788e-14	-1.38831e-11	-1.8108e-09	-1.05979e-07	-3.17539e-06	-5.43801e-05	-0.000583603	-0.00424	-0.02222	-0.01533	0.36043	0.79961	1.0247	0.86161	0.29171	-0.53565	-1.32079	-1.65252	-1.43642	-0.66229	0.49017	1.71863	2.70465	1.41686	-1.97539	-2.87543	-2.84946
1670.98	-1.3602e-46	-1.34227e-36	-1.08477e-28	-1.95791e-22	-1.74556e-17	-1.44051e-13	-1.80857e-10	-5.11845e-08	-4.45676e-06	-0.000152709	-0.0025	-0.02286	-0.1316	-0.52572	-0.89502	-0.91804	-0.72394	-0.62667	-0.53813	-0.31531	0.1065	0.652	1.12387	1.243	1.01721	0.50015	-0.193	-0.92919	-1.59459	-2.79906	-2.52041	-1.98696	-1.43441
1671.61	-4.25608e-31	-5.28809e-25	-4.68008e-20	-4.85149e-16	-8.82063e-13	-3.90351e-10	-5.48621e-08	-3.03902e-06	-7.90611e-05	-0.00111	-0.00953	-0.05448	-0.22422	-0.70705	-1.42877	-1.79969	-1.75594	-1.55981	-1.16725	-0.53438	0.29643	1.17041	1.85197	2.06103	1.7943	1.12026	0.17509	-0.88331	-1.91309	-4.42199	-4.54233	-3.74315	-2.75139
1674.08	-1.73549e-19	-1.28529e-15	-1.80853e-12	-6.58919e-10	-7.99646e-08	-3.96746e-06	-9.50783e-05	-0.00126	-0.01032	-0.05711	-0.22975	-0.55702	-0.59439	-0.14979	0.51197	1.12634	1.4494	1.20693	0.45996	-0.53861	-1.4419	-1.93772	-1.85888	-1.25835	-0.33647	0.64748	1.46182	1.96702	2.13598	1.06857	0.42856	0.22382	0.28547
1674.93	-1.10156e-39	-1.02171e-30	-1.0312e-23	-3.04724e-18	-5.71147e-14	-1.24193e-10	0.55842	1.77965	1.95611	2.23528	2.28569	2.12226	1.5465	0.39781	-0.60405	-1.30939	-1.53913	-1.30639	-0.56139	0.51149	1.55649	2.20567	2.20092	1.44614	0.32538	-0.87084	-1.89817	-2.6144	-2.98762	-2.5512	-1.69096	-0.88285	-0.26486
1675.51	-3.09217e-21	-2.03979e-16	-1.25053e-12	-1.18494e-09	-2.58829e-07	-1.78436e-05	0.17684	0.66492	1.0451	1.17277	0.69269	0.06738	-0.2461	-0.54646	-0.79624	-0.80763	-0.436	0.11531	0.6998	1.13503	1.28071	1.09224	0.60956	-0.07521	-0.70196	-1.16611	-1.42892	-1.50901	-1.45867	-0.9932	-0.59879	-0.21323	0.07608
1687.84	-3.19613e-20	-3.61203e-16	-7.02472e-13	-3.27614e-10	-4.79605e-08	-2.74207e-06	-7.31038e-05	-0.00105	-0.00912	-0.05267	-0.21866	-0.5194	-0.59703	-0.41345	-0.24439	-0.166	-0.06049	0.00263	0.08828	0.22231	0.3722	0.46588	0.4191	0.15759	-0.17456	-0.46977	-0.63263	-0.61303	-0.42039	0.51171	0.24448	0.12199	0.26547
1688.48	-1.04937e-28	-1.6335e-23	-3.20667e-19	-1.13626e-15	-9.77611e-13	-2.60965e-10	-2.64703e-08	-1.20636e-06	-2.83738e-05	-0.000386218	-0.00334	-0.01993	-0.08718	-0.22999	-0.09106	0.33236	0.83776	1.10436	1.0185	0.61305	0.02786	-0.5573	-0.97727	-1.12514	-0.99965	-0.60785	-0.0026	0.72754	1.46967	2.21414	-0.05467	-1.3183	-1.48689
1689.28	-1.36483e-27	-2.13187e-21	-1.56112e-16	-1.03342e-12	-1.03576e-09	0.28832	1.55376	2.60457	3.07744	3.39121	3.2829	2.64298	1.85324	1.24445	0.51547	-0.25486	-0.74499	-0.9748	-0.89405	-0.5669	-0.12749	0.28607	0.56049	0.60372	0.55788	0.47374	0.38859	0.3193	0.26518	-0.05673	-0.29871	-0.15503	0.10388
1692.78	-1.3186e-23	-1.22043e-18	-1.15225e-14	-1.75026e-11	-6.15986e-09	-6.72553e-07	-2.87763e-05	-0.000581715	-0.00645	-0.04428	-0.20685	-0.39416	-0.34936	-0.36195	-0.52592	-0.80216	-0.92552	-0.86082	-0.48131	0.20176	1.02162	1.71887	2.02313	1.71463	0.9721	-0.03362	-1.10274	-2.06644	-2.82079	-3.79481	-3.35392	-2.52618	-1.7252
1693.48	-2.85887e-35	-2.31295e-28	-9.25353e-23	-3.23192e-18	-1.56246e-14	-1.51948e-11	-4.02507e-09	-3.71374e-07	-1.45677e-05	-0.000285584	-0.00319	-0.02258	-0.1104	-0.3999	-1.1357	-1.50996	-1.39634	-1.1464	-0.81665	-0.41902	0.03831	0.51471	0.92819	1.13978	1.13717	0.93104	0.55241	0.04258	-0.55444	-3.10938	-4.19003	-3.73687	-2.8018
1693.93	-9.88667e-34	-1.92786e-27	-2.78516e-22	-4.75846e-18	-1.41099e-14	-9.94697e-12	-2.1581e-09	-1.78085e-07	-6.64965e-06	-0.000129559	-0.00148	-0.01092	-0.05625	-0.21582	-0.65031	-1.60012	-2.53411	-2.84942	-2.67499	-2.00662	-0.86494	0.55713	1.9157	2.75675	2.87059	2.25954	1.09844	-0.33915	-1.77204	-4.81136	-5.03255	-4.4376	-3.26805
1724.28	-2.31652e-127	-1.35524e-100	-2.13461e-79	-1.30545e-62	-2.56552e-49	-8.63812e-39	-1.87538e-30	-7.49923e-24	-1.26816e-18	-1.75156e-14	-3.32773e-11	-1.31406e-08	-1.49552e-06	-6.3549e-05	-0.00124	-0.01299	-0.08364	-0.36545	-0.81303	-0.95902	-0.95894	-1.04441	-1.11251	-0.7567	-0.09378	0.74239	1.50918	1.95817	1.92957	-2.10289	-4.78303	-4.53661	-3.49012
